# Supplementary material for: Natural Variation in Fish Transcriptomes: Comparative Analysis of the Fathead Minnow (Pimephales promelas) and Zebrafish (Danio rerio)
Source: PubMed Central journal article supplement (PMC4262388; doi:10.1371/journal.pone.0114178), 2014-12-10
Supplement: pone.0114178.s002.pdf [file pone.0114178.s002.pdf]

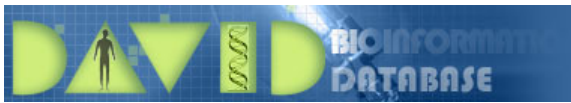

## Functional Annotation Clustering

[Help and Manual](#)

Current Gene List: **BetweenBatch\_FHM\_InVivoTop100byFpvalue.combined**

Current Background: **Danio rerio**

258 DAVID IDs

Options Classification Stringency  ▾

### 28 Cluster(s)

[Download File](#)

|                          | Annotation Cluster   | Enrichment Score                                                             |                    |  | Count | P_Value | Benjamini |
|--------------------------|----------------------|------------------------------------------------------------------------------|--------------------|--|-------|---------|-----------|
| <input type="checkbox"/> | Annotation Cluster 1 | Enrichment Score: 1.99                                                       | <b>G</b>           |  |       |         |           |
| <input type="checkbox"/> | KEGG_PATHWAY         | <a href="#">Spliceosome</a>                                                  | <a href="#">RT</a> |  | 7     | 3.8E-3  | 1.7E-1    |
| <input type="checkbox"/> | KEGG_PATHWAY         | <a href="#">RNA degradation</a>                                              | <a href="#">RT</a> |  | 5     | 6.2E-3  | 1.4E-1    |
| <input type="checkbox"/> | INTERPRO             | <a href="#">Like-Sm ribonucleoprotein, eukaryotic and archaea-type, core</a> | <a href="#">RT</a> |  | 3     | 1.5E-2  | 9.5E-1    |
| <input type="checkbox"/> | INTERPRO             | <a href="#">Like-Sm ribonucleoprotein, core</a>                              | <a href="#">RT</a> |  | 3     | 1.7E-2  | 8.9E-1    |
| <input type="checkbox"/> | SMART                | <a href="#">Sm</a>                                                           | <a href="#">RT</a> |  | 3     | 1.9E-2  | 5.9E-1    |
| <input type="checkbox"/> | Annotation Cluster 2 | Enrichment Score: 1.51                                                       | <b>G</b>           |  |       |         |           |
| <input type="checkbox"/> | INTERPRO             | <a href="#">Zinc finger, PHD-finger</a>                                      | <a href="#">RT</a> |  | 5     | 1.2E-2  | 9.9E-1    |
| <input type="checkbox"/> | INTERPRO             | <a href="#">Zinc finger, PHD-type</a>                                        | <a href="#">RT</a> |  | 5     | 1.2E-2  | 9.9E-1    |
| <input type="checkbox"/> | SMART                | <a href="#">PHD</a>                                                          | <a href="#">RT</a> |  | 5     | 1.8E-2  | 8.1E-1    |
| <input type="checkbox"/> | INTERPRO             | <a href="#">Zinc finger, PHD-type, conserved site</a>                        | <a href="#">RT</a> |  | 4     | 3.9E-2  | 9.5E-1    |
| <input type="checkbox"/> | SP_PIR_KEYWORDS      | <a href="#">zinc</a>                                                         | <a href="#">RT</a> |  | 13    | 3.0E-1  | 9.4E-1    |
| <input type="checkbox"/> | Annotation Cluster 3 | Enrichment Score: 1.12                                                       | <b>G</b>           |  |       |         |           |
| <input type="checkbox"/> | GOTERM_MF_FAT        | <a href="#">translation factor activity, nucleic acid binding</a>            | <a href="#">RT</a> |  | 5     | 2.4E-2  | 8.4E-1    |
| <input type="checkbox"/> | SP_PIR_KEYWORDS      | <a href="#">Initiation factor</a>                                            | <a href="#">RT</a> |  | 3     | 1.1E-1  | 9.1E-1    |
| <input type="checkbox"/> | GOTERM_MF_FAT        | <a href="#">translation initiation factor activity</a>                       | <a href="#">RT</a> |  | 3     | 1.6E-1  | 9.9E-1    |
| <input type="checkbox"/> | Annotation Cluster 4 | Enrichment Score: 1.1                                                        | <b>G</b>           |  |       |         |           |
| <input type="checkbox"/> | INTERPRO             | <a href="#">DNA/RNA helicase, C-terminal</a>                                 | <a href="#">RT</a> |  | 4     | 6.1E-2  | 9.8E-1    |
| <input type="checkbox"/> | INTERPRO             | <a href="#">DEAD-like helicase, N-terminal</a>                               | <a href="#">RT</a> |  | 4     | 6.3E-2  | 9.7E-1    |
| <input type="checkbox"/> | INTERPRO             | <a href="#">Helicase, superfamily 1 and 2, ATP-binding</a>                   | <a href="#">RT</a> |  | 4     | 6.6E-2  | 9.6E-1    |
| <input type="checkbox"/> | SMART                | <a href="#">HELICc</a>                                                       | <a href="#">RT</a> |  | 4     | 8.1E-2  | 9.3E-1    |
| <input type="checkbox"/> | SMART                | <a href="#">DEXDc</a>                                                        | <a href="#">RT</a> |  | 4     | 8.3E-2  | 8.7E-1    |
| <input type="checkbox"/> | GOTERM_MF_FAT        | <a href="#">helicase activity</a>                                            | <a href="#">RT</a> |  | 4     | 1.4E-1  | 1.0E0     |
| <input type="checkbox"/> | Annotation Cluster 5 | Enrichment Score: 1.02                                                       | <b>G</b>           |  |       |         |           |
| <input type="checkbox"/> | GOTERM_MF_FAT        | <a href="#">translation factor activity, nucleic acid binding</a>            | <a href="#">RT</a> |  | 5     | 2.4E-2  | 8.4E-1    |
| <input type="checkbox"/> | SP_PIR_KEYWORDS      | <a href="#">protein biosynthesis</a>                                         | <a href="#">RT</a> |  | 3     | 1.4E-1  | 8.9E-1    |
| <input type="checkbox"/> | GOTERM_BP_FAT        | <a href="#">translation</a>                                                  | <a href="#">RT</a> |  | 6     | 2.7E-1  | 1.0E0     |
| <input type="checkbox"/> | Annotation Cluster 6 | Enrichment Score: 1                                                          | <b>G</b>           |  |       |         |           |
| <input type="checkbox"/> | UP_SEQ_FEATURE       | DNA-binding region:Homeobox                                                  | <a href="#">RT</a> |  | 6     | 1.7E-2  | 8.5E-1    |
| <input type="checkbox"/> | GOTERM_BP_FAT        | <a href="#">regulation of transcription</a>                                  | <a href="#">RT</a> |  | 23    | 3.0E-2  | 1.0E0     |
| <input type="checkbox"/> | GOTERM_BP_FAT        | <a href="#">transcription</a>                                                | <a href="#">RT</a> |  | 13    | 4.1E-2  | 1.0E0     |
| <input type="checkbox"/> | SP_PIR_KEYWORDS      | <a href="#">Transcription</a>                                                | <a href="#">RT</a> |  | 12    | 4.5E-2  | 9.9E-1    |
| <input type="checkbox"/> | SP_PIR_KEYWORDS      | <a href="#">transcription regulation</a>                                     | <a href="#">RT</a> |  | 12    | 4.8E-2  | 9.2E-1    |
| <input type="checkbox"/> | INTERPRO             | <a href="#">Homeobox, conserved site</a>                                     | <a href="#">RT</a> |  | 7     | 7.0E-2  | 9.5E-1    |
| <input type="checkbox"/> | SP_PIR_KEYWORDS      | <a href="#">developmental protein</a>                                        | <a href="#">RT</a> |  | 9     | 7.9E-2  | 9.4E-1    |
| <input type="checkbox"/> | GOTERM_MF_FAT        | <a href="#">DNA binding</a>                                                  | <a href="#">RT</a> |  | 21    | 1.1E-1  | 1.0E0     |
| <input type="checkbox"/> | SP_PIR_KEYWORDS      | <a href="#">Homeobox</a>                                                     | <a href="#">RT</a> |  | 7     | 1.1E-1  | 8.7E-1    |
| <input type="checkbox"/> | INTERPRO             | <a href="#">Homeobox</a>                                                     | <a href="#">RT</a> |  | 7     | 1.2E-1  | 9.8E-1    |
| <input type="checkbox"/> | GOTERM_BP_FAT        | <a href="#">regulation of transcription, DNA-dependent</a>                   | <a href="#">RT</a> |  | 16    | 1.3E-1  | 1.0E0     |

|                          |                 |                                                                       |                                     |          | Count | P_Value | Benjamini |
|--------------------------|-----------------|-----------------------------------------------------------------------|-------------------------------------|----------|-------|---------|-----------|
| <input type="checkbox"/> | INTERPRO        | <a href="#">dependent</a>                                             | <a href="#">Homeodomain-related</a> | RT       | 7     | 1.3E-1  | 9.8E-1    |
| <input type="checkbox"/> | GOTERM_BP_FAT   | <a href="#">regulation of RNA metabolic process</a>                   |                                     | RT       | 16    | 1.4E-1  | 1.0E0     |
| <input type="checkbox"/> | SP_PIR_KEYWORDS | <a href="#">dna-binding</a>                                           |                                     | RT       | 13    | 1.4E-1  | 8.7E-1    |
| <input type="checkbox"/> | GOTERM_MF_FAT   | <a href="#">transcription factor activity</a>                         |                                     | RT       | 13    | 1.5E-1  | 9.9E-1    |
| <input type="checkbox"/> | SMART           | <a href="#">HOX</a>                                                   |                                     | RT       | 7     | 1.8E-1  | 9.5E-1    |
| <input type="checkbox"/> | GOTERM_MF_FAT   | <a href="#">transcription regulator activity</a>                      |                                     | RT       | 15    | 2.5E-1  | 9.9E-1    |
| <input type="checkbox"/> | SP_PIR_KEYWORDS | <a href="#">nucleus</a>                                               |                                     | RT       | 18    | 3.2E-1  | 9.4E-1    |
| <input type="checkbox"/> | GOTERM_MF_FAT   | <a href="#">sequence-specific DNA binding</a>                         |                                     | RT       | 9     | 3.7E-1  | 9.8E-1    |
| Annotation Cluster 7     |                 | Enrichment Score: 0.96                                                |                                     | <b>G</b> |       |         |           |
| <input type="checkbox"/> | GOTERM_BP_FAT   | <a href="#">cell part morphogenesis</a>                               |                                     | RT       | 5     | 3.9E-2  | 1.0E0     |
| <input type="checkbox"/> | GOTERM_BP_FAT   | <a href="#">cellular component morphogenesis</a>                      |                                     | RT       | 6     | 5.3E-2  | 9.9E-1    |
| <input type="checkbox"/> | GOTERM_BP_FAT   | <a href="#">cell morphogenesis</a>                                    |                                     | RT       | 5     | 8.7E-2  | 1.0E0     |
| <input type="checkbox"/> | GOTERM_BP_FAT   | <a href="#">cell projection morphogenesis</a>                         |                                     | RT       | 4     | 1.3E-1  | 1.0E0     |
| <input type="checkbox"/> | GOTERM_BP_FAT   | <a href="#">cell projection organization</a>                          |                                     | RT       | 4     | 2.0E-1  | 1.0E0     |
| <input type="checkbox"/> | GOTERM_BP_FAT   | <a href="#">cell motion</a>                                           |                                     | RT       | 4     | 3.9E-1  | 1.0E0     |
| Annotation Cluster 8     |                 | Enrichment Score: 0.93                                                |                                     | <b>G</b> |       |         |           |
| <input type="checkbox"/> | GOTERM_BP_FAT   | <a href="#">determination of bilateral symmetry</a>                   |                                     | RT       | 4     | 9.3E-2  | 1.0E0     |
| <input type="checkbox"/> | GOTERM_BP_FAT   | <a href="#">determination of symmetry</a>                             |                                     | RT       | 4     | 9.3E-2  | 1.0E0     |
| <input type="checkbox"/> | GOTERM_BP_FAT   | <a href="#">pattern specification process</a>                         |                                     | RT       | 7     | 1.1E-1  | 1.0E0     |
| <input type="checkbox"/> | GOTERM_BP_FAT   | <a href="#">determination of left/right symmetry</a>                  |                                     | RT       | 3     | 2.1E-1  | 1.0E0     |
| Annotation Cluster 9     |                 | Enrichment Score: 0.64                                                |                                     | <b>G</b> |       |         |           |
| <input type="checkbox"/> | GOTERM_CC_FAT   | <a href="#">integral to organelle membrane</a>                        |                                     | RT       | 3     | 1.1E-1  | 1.0E0     |
| <input type="checkbox"/> | GOTERM_CC_FAT   | <a href="#">intrinsic to organelle membrane</a>                       |                                     | RT       | 3     | 1.5E-1  | 1.0E0     |
| <input type="checkbox"/> | GOTERM_CC_FAT   | <a href="#">endomembrane system</a>                                   |                                     | RT       | 4     | 3.0E-1  | 1.0E0     |
| <input type="checkbox"/> | GOTERM_CC_FAT   | <a href="#">organelle membrane</a>                                    |                                     | RT       | 4     | 5.8E-1  | 1.0E0     |
| Annotation Cluster 10    |                 | Enrichment Score: 0.6                                                 |                                     | <b>G</b> |       |         |           |
| <input type="checkbox"/> | INTERPRO        | <a href="#">Src homology-3 domain</a>                                 |                                     | RT       | 5     | 1.6E-1  | 9.9E-1    |
| <input type="checkbox"/> | SMART           | <a href="#">SH3</a>                                                   |                                     | RT       | 5     | 2.2E-1  | 9.6E-1    |
| <input type="checkbox"/> | SP_PIR_KEYWORDS | <a href="#">sh3 domain</a>                                            |                                     | RT       | 3     | 4.4E-1  | 9.7E-1    |
| Annotation Cluster 11    |                 | Enrichment Score: 0.58                                                |                                     | <b>G</b> |       |         |           |
| <input type="checkbox"/> | GOTERM_BP_FAT   | <a href="#">pattern specification process</a>                         |                                     | RT       | 7     | 1.1E-1  | 1.0E0     |
| <input type="checkbox"/> | GOTERM_BP_FAT   | <a href="#">somitogenesis</a>                                         |                                     | RT       | 3     | 2.4E-1  | 1.0E0     |
| <input type="checkbox"/> | GOTERM_BP_FAT   | <a href="#">embryonic development ending in birth or egg hatching</a> |                                     | RT       | 4     | 2.6E-1  | 1.0E0     |
| <input type="checkbox"/> | GOTERM_BP_FAT   | <a href="#">chordate embryonic development</a>                        |                                     | RT       | 4     | 2.6E-1  | 1.0E0     |
| <input type="checkbox"/> | GOTERM_BP_FAT   | <a href="#">segmentation</a>                                          |                                     | RT       | 3     | 2.7E-1  | 1.0E0     |
| <input type="checkbox"/> | GOTERM_BP_FAT   | <a href="#">regionalization</a>                                       |                                     | RT       | 4     | 4.4E-1  | 1.0E0     |
| <input type="checkbox"/> | GOTERM_BP_FAT   | <a href="#">anterior/posterior pattern formation</a>                  |                                     | RT       | 3     | 4.6E-1  | 1.0E0     |
| Annotation Cluster 12    |                 | Enrichment Score: 0.52                                                |                                     | <b>G</b> |       |         |           |
| <input type="checkbox"/> | SP_PIR_KEYWORDS | <a href="#">transit peptide</a>                                       |                                     | RT       | 3     | 2.0E-1  | 9.2E-1    |
| <input type="checkbox"/> | GOTERM_BP_FAT   | <a href="#">translation</a>                                           |                                     | RT       | 6     | 2.7E-1  | 1.0E0     |
| <input type="checkbox"/> | UP_SEQ_FEATURE  | transit peptide:Mitochondrion                                         |                                     | RT       | 3     | 2.8E-1  | 1.0E0     |
| <input type="checkbox"/> | SP_PIR_KEYWORDS | <a href="#">mitochondrion</a>                                         |                                     | RT       | 3     | 5.6E-1  | 9.8E-1    |
| Annotation Cluster 13    |                 | Enrichment Score: 0.49                                                |                                     | <b>G</b> |       |         |           |
| <input type="checkbox"/> | INTERPRO        | <a href="#">Small GTP-binding protein</a>                             |                                     | RT       | 5     | 2.1E-1  | 1.0E0     |
| <input type="checkbox"/> | GOTERM_MF_FAT   | <a href="#">GTPase activity</a>                                       |                                     | RT       | 3     | 2.2E-1  | 1.0E0     |
| <input type="checkbox"/> | INTERPRO        | <a href="#">Ras</a>                                                   |                                     | RT       | 4     | 2.6E-1  | 1.0E0     |
| <input type="checkbox"/> | SP_PIR_KEYWORDS | <a href="#">gtp-binding</a>                                           |                                     | RT       | 6     | 2.7E-1  | 9.5E-1    |
| <input type="checkbox"/> | INTERPRO        | <a href="#">Ras GTPase</a>                                            |                                     | RT       | 4     | 3.1E-1  | 1.0E0     |
| <input type="checkbox"/> | GOTERM_MF_FAT   | <a href="#">GTP binding</a>                                           |                                     | RT       | 7     | 3.2E-1  | 9.9E-1    |
| <input type="checkbox"/> | GOTERM_MF_FAT   | <a href="#">guanyl ribonucleotide binding</a>                         |                                     | RT       | 7     | 3.3E-1  | 9.9E-1    |
| <input type="checkbox"/> | GOTERM_MF_FAT   | <a href="#">guanyl nucleotide binding</a>                             |                                     | RT       | 7     | 3.3E-1  | 9.9E-1    |
| <input type="checkbox"/> | SP_PIR_KEYWORDS | <a href="#">nucleotide-binding</a>                                    |                                     | RT       | 14    | 4.6E-1  | 9.6E-1    |

| <input type="checkbox"/> |                       |                                                              |          |  |  |  |  |       |         |           |
|--------------------------|-----------------------|--------------------------------------------------------------|----------|--|--|--|--|-------|---------|-----------|
| <input type="checkbox"/> | GOTERM_BP_FAT         | <a href="#">intracellular signaling cascade</a>              | RT       |  |  |  |  | 7     | 4.7E-1  | 1.0E0     |
| <input type="checkbox"/> | GOTERM_BP_FAT         | <a href="#">small GTPase mediated signal transduction</a>    | RT       |  |  |  |  | 4     | 5.1E-1  | 1.0E0     |
|                          | Annotation Cluster 14 | Enrichment Score: 0.42                                       | <b>G</b> |  |  |  |  | Count | P_Value | Benjamini |
| <input type="checkbox"/> | GOTERM_BP_FAT         | <a href="#">embryonic organ morphogenesis</a>                | RT       |  |  |  |  | 3     | 3.0E-1  | 1.0E0     |
| <input type="checkbox"/> | GOTERM_BP_FAT         | <a href="#">embryonic organ development</a>                  | RT       |  |  |  |  | 4     | 3.1E-1  | 1.0E0     |
| <input type="checkbox"/> | GOTERM_BP_FAT         | <a href="#">embryonic morphogenesis</a>                      | RT       |  |  |  |  | 4     | 5.8E-1  | 1.0E0     |
|                          | Annotation Cluster 15 | Enrichment Score: 0.39                                       | <b>G</b> |  |  |  |  | Count | P_Value | Benjamini |
| <input type="checkbox"/> | SP_PIR_KEYWORDS       | <a href="#">zinc</a>                                         | RT       |  |  |  |  | 13    | 3.0E-1  | 9.4E-1    |
| <input type="checkbox"/> | SP_PIR_KEYWORDS       | <a href="#">zinc-finger</a>                                  | RT       |  |  |  |  | 7     | 3.7E-1  | 9.6E-1    |
| <input type="checkbox"/> | INTERPRO              | <a href="#">Zinc finger, RING-type</a>                       | RT       |  |  |  |  | 5     | 4.2E-1  | 1.0E0     |
| <input type="checkbox"/> | INTERPRO              | <a href="#">Zinc finger, C3HC4 RING-type</a>                 | RT       |  |  |  |  | 4     | 4.7E-1  | 1.0E0     |
| <input type="checkbox"/> | SMART                 | <a href="#">RING</a>                                         | RT       |  |  |  |  | 5     | 5.1E-1  | 1.0E0     |
|                          | Annotation Cluster 16 | Enrichment Score: 0.39                                       | <b>G</b> |  |  |  |  | Count | P_Value | Benjamini |
| <input type="checkbox"/> | GOTERM_CC_FAT         | <a href="#">nucleoplasm part</a>                             | RT       |  |  |  |  | 3     | 3.5E-1  | 1.0E0     |
| <input type="checkbox"/> | GOTERM_CC_FAT         | <a href="#">intracellular organelle lumen</a>                | RT       |  |  |  |  | 4     | 3.8E-1  | 1.0E0     |
| <input type="checkbox"/> | GOTERM_CC_FAT         | <a href="#">organelle lumen</a>                              | RT       |  |  |  |  | 4     | 3.8E-1  | 1.0E0     |
| <input type="checkbox"/> | GOTERM_CC_FAT         | <a href="#">nucleoplasm</a>                                  | RT       |  |  |  |  | 3     | 4.0E-1  | 9.9E-1    |
| <input type="checkbox"/> | GOTERM_CC_FAT         | <a href="#">membrane-enclosed lumen</a>                      | RT       |  |  |  |  | 4     | 4.1E-1  | 9.9E-1    |
| <input type="checkbox"/> | GOTERM_CC_FAT         | <a href="#">nuclear lumen</a>                                | RT       |  |  |  |  | 3     | 5.7E-1  | 1.0E0     |
|                          | Annotation Cluster 17 | Enrichment Score: 0.34                                       | <b>G</b> |  |  |  |  | Count | P_Value | Benjamini |
| <input type="checkbox"/> | GOTERM_BP_FAT         | <a href="#">translation</a>                                  | RT       |  |  |  |  | 6     | 2.7E-1  | 1.0E0     |
| <input type="checkbox"/> | GOTERM_CC_FAT         | <a href="#">ribonucleoprotein complex</a>                    | RT       |  |  |  |  | 5     | 2.8E-1  | 1.0E0     |
| <input type="checkbox"/> | SP_PIR_KEYWORDS       | <a href="#">ribosomal protein</a>                            | RT       |  |  |  |  | 3     | 4.8E-1  | 9.6E-1    |
| <input type="checkbox"/> | GOTERM_CC_FAT         | <a href="#">ribosome</a>                                     | RT       |  |  |  |  | 3     | 5.2E-1  | 1.0E0     |
| <input type="checkbox"/> | GOTERM_MF_FAT         | <a href="#">structural constituent of ribosome</a>           | RT       |  |  |  |  | 3     | 5.5E-1  | 9.9E-1    |
| <input type="checkbox"/> | GOTERM_MF_FAT         | <a href="#">structural molecule activity</a>                 | RT       |  |  |  |  | 3     | 9.2E-1  | 1.0E0     |
|                          | Annotation Cluster 18 | Enrichment Score: 0.32                                       | <b>G</b> |  |  |  |  | Count | P_Value | Benjamini |
| <input type="checkbox"/> | INTERPRO              | <a href="#">Zinc finger, C2H2-type</a>                       | RT       |  |  |  |  | 8     | 3.6E-1  | 1.0E0     |
| <input type="checkbox"/> | INTERPRO              | <a href="#">Zinc finger, C2H2-like</a>                       | RT       |  |  |  |  | 7     | 4.9E-1  | 1.0E0     |
| <input type="checkbox"/> | SMART                 | <a href="#">ZnF_C2H2</a>                                     | RT       |  |  |  |  | 7     | 6.1E-1  | 1.0E0     |
|                          | Annotation Cluster 19 | Enrichment Score: 0.3                                        | <b>G</b> |  |  |  |  | Count | P_Value | Benjamini |
| <input type="checkbox"/> | INTERPRO              | <a href="#">Serine/threonine protein kinase</a>              | RT       |  |  |  |  | 5     | 2.6E-1  | 1.0E0     |
| <input type="checkbox"/> | GOTERM_MF_FAT         | <a href="#">purine ribonucleotide binding</a>                | RT       |  |  |  |  | 21    | 3.0E-1  | 9.9E-1    |
| <input type="checkbox"/> | GOTERM_MF_FAT         | <a href="#">ribonucleotide binding</a>                       | RT       |  |  |  |  | 21    | 3.0E-1  | 9.9E-1    |
| <input type="checkbox"/> | GOTERM_MF_FAT         | <a href="#">nucleotide binding</a>                           | RT       |  |  |  |  | 25    | 3.3E-1  | 9.8E-1    |
| <input type="checkbox"/> | SMART                 | <a href="#">S_TKc</a>                                        | RT       |  |  |  |  | 5     | 3.3E-1  | 9.9E-1    |
| <input type="checkbox"/> | GOTERM_MF_FAT         | <a href="#">purine nucleotide binding</a>                    | RT       |  |  |  |  | 21    | 3.7E-1  | 9.9E-1    |
| <input type="checkbox"/> | INTERPRO              | <a href="#">Serine/threonine protein kinase-related</a>      | RT       |  |  |  |  | 6     | 4.3E-1  | 1.0E0     |
| <input type="checkbox"/> | INTERPRO              | <a href="#">Serine/threonine protein kinase, active site</a> | RT       |  |  |  |  | 5     | 4.5E-1  | 1.0E0     |
| <input type="checkbox"/> | SP_PIR_KEYWORDS       | <a href="#">nucleotide-binding</a>                           | RT       |  |  |  |  | 14    | 4.6E-1  | 9.6E-1    |
| <input type="checkbox"/> | GOTERM_MF_FAT         | <a href="#">ATP binding</a>                                  | RT       |  |  |  |  | 15    | 4.7E-1  | 9.9E-1    |
| <input type="checkbox"/> | GOTERM_MF_FAT         | <a href="#">adenyl ribonucleotide binding</a>                | RT       |  |  |  |  | 15    | 4.7E-1  | 9.9E-1    |
| <input type="checkbox"/> | GOTERM_MF_FAT         | <a href="#">adenyl nucleotide binding</a>                    | RT       |  |  |  |  | 15    | 5.4E-1  | 9.9E-1    |
| <input type="checkbox"/> | GOTERM_MF_FAT         | <a href="#">purine nucleoside binding</a>                    | RT       |  |  |  |  | 15    | 5.5E-1  | 9.9E-1    |
| <input type="checkbox"/> | GOTERM_MF_FAT         | <a href="#">protein kinase activity</a>                      | RT       |  |  |  |  | 7     | 5.5E-1  | 9.9E-1    |
| <input type="checkbox"/> | GOTERM_MF_FAT         | <a href="#">nucleoside binding</a>                           | RT       |  |  |  |  | 15    | 5.6E-1  | 9.9E-1    |
| <input type="checkbox"/> | GOTERM_BP_FAT         | <a href="#">phosphorylation</a>                              | RT       |  |  |  |  | 8     | 5.7E-1  | 1.0E0     |
| <input type="checkbox"/> | GOTERM_BP_FAT         | <a href="#">protein amino acid phosphorylation</a>           | RT       |  |  |  |  | 7     | 5.8E-1  | 1.0E0     |
| <input type="checkbox"/> | GOTERM_MF_FAT         | <a href="#">protein serine/threonine kinase activity</a>     | RT       |  |  |  |  | 5     | 5.8E-1  | 9.9E-1    |
| <input type="checkbox"/> | INTERPRO              | <a href="#">Protein kinase, core</a>                         | RT       |  |  |  |  | 6     | 6.2E-1  | 1.0E0     |
| <input type="checkbox"/> | GOTERM_BP_FAT         | <a href="#">phosphorus metabolic process</a>                 | RT       |  |  |  |  | 9     | 6.5E-1  | 1.0E0     |
| <input type="checkbox"/> | GOTERM_BP_FAT         | <a href="#">phosphate metabolic process</a>                  | RT       |  |  |  |  | 9     | 6.5E-1  | 1.0E0     |
| <input type="checkbox"/> | SP_PIR_KEYWORDS       | <a href="#">etc. binding</a>                                 | RT       |  |  |  |  | 0     | 0.0E+0  | 1.0E0     |

|                          |                 |                                                                            |          |  | Count | P_Value | Benjamini |
|--------------------------|-----------------|----------------------------------------------------------------------------|----------|--|-------|---------|-----------|
| <input type="checkbox"/> | SP_PIR_KEYWORDS | <a href="#">atp-binding</a>                                                | RT       |  | 8     | 8.0E-1  | 1.0E0     |
| <input type="checkbox"/> | SP_PIR_KEYWORDS | <a href="#">serine/threonine-protein kinase</a>                            | RT       |  | 3     | 8.2E-1  | 1.0E0     |
| <input type="checkbox"/> | INTERPRO        | <a href="#">Protein kinase, ATP binding site</a>                           | RT       |  | 3     | 9.4E-1  | 1.0E0     |
| Annotation Cluster 20    |                 | Enrichment Score: 0.29                                                     | <b>G</b> |  | Count | P_Value | Benjamini |
| <input type="checkbox"/> | GOTERM_BP_FAT   | <a href="#">ubiquitin-dependent protein catabolic process</a>              | RT       |  | 3     | 1.9E-1  | 1.0E0     |
| <input type="checkbox"/> | GOTERM_BP_FAT   | <a href="#">cellular macromolecule catabolic process</a>                   | RT       |  | 5     | 2.9E-1  | 1.0E0     |
| <input type="checkbox"/> | GOTERM_BP_FAT   | <a href="#">macromolecule catabolic process</a>                            | RT       |  | 5     | 3.9E-1  | 1.0E0     |
| <input type="checkbox"/> | GOTERM_BP_FAT   | <a href="#">modification-dependent protein catabolic process</a>           | RT       |  | 3     | 6.6E-1  | 1.0E0     |
| <input type="checkbox"/> | GOTERM_BP_FAT   | <a href="#">modification-dependent macromolecule catabolic process</a>     | RT       |  | 3     | 6.6E-1  | 1.0E0     |
| <input type="checkbox"/> | GOTERM_BP_FAT   | <a href="#">proteolysis involved in cellular protein catabolic process</a> | RT       |  | 3     | 7.1E-1  | 1.0E0     |
| <input type="checkbox"/> | GOTERM_BP_FAT   | <a href="#">cellular protein catabolic process</a>                         | RT       |  | 3     | 7.1E-1  | 1.0E0     |
| <input type="checkbox"/> | GOTERM_BP_FAT   | <a href="#">proteolysis</a>                                                | RT       |  | 7     | 7.5E-1  | 1.0E0     |
| <input type="checkbox"/> | GOTERM_BP_FAT   | <a href="#">protein catabolic process</a>                                  | RT       |  | 3     | 7.5E-1  | 1.0E0     |
| Annotation Cluster 21    |                 | Enrichment Score: 0.28                                                     | <b>G</b> |  | Count | P_Value | Benjamini |
| <input type="checkbox"/> | SP_PIR_KEYWORDS | <a href="#">egf-like domain</a>                                            | RT       |  | 3     | 4.4E-1  | 9.7E-1    |
| <input type="checkbox"/> | INTERPRO        | <a href="#">EGF-like region, conserved site</a>                            | RT       |  | 4     | 4.5E-1  | 1.0E0     |
| <input type="checkbox"/> | INTERPRO        | <a href="#">EGF-like, type 3</a>                                           | RT       |  | 3     | 4.8E-1  | 1.0E0     |
| <input type="checkbox"/> | INTERPRO        | <a href="#">EGF-like</a>                                                   | RT       |  | 3     | 5.2E-1  | 1.0E0     |
| <input type="checkbox"/> | SMART           | <a href="#">EGF</a>                                                        | RT       |  | 3     | 5.9E-1  | 1.0E0     |
| <input type="checkbox"/> | GOTERM_CC_FAT   | <a href="#">extracellular region</a>                                       | RT       |  | 5     | 6.9E-1  | 1.0E0     |
| Annotation Cluster 22    |                 | Enrichment Score: 0.26                                                     | <b>G</b> |  | Count | P_Value | Benjamini |
| <input type="checkbox"/> | INTERPRO        | <a href="#">EF-HAND 2</a>                                                  | RT       |  | 4     | 4.4E-1  | 1.0E0     |
| <input type="checkbox"/> | INTERPRO        | <a href="#">EF-Hand type</a>                                               | RT       |  | 4     | 4.7E-1  | 1.0E0     |
| <input type="checkbox"/> | INTERPRO        | <a href="#">Calcium-binding EF-hand</a>                                    | RT       |  | 3     | 5.4E-1  | 1.0E0     |
| <input type="checkbox"/> | SMART           | <a href="#">Efh</a>                                                        | RT       |  | 3     | 6.0E-1  | 1.0E0     |
| <input type="checkbox"/> | GOTERM_MF_FAT   | <a href="#">calcium ion binding</a>                                        | RT       |  | 6     | 7.2E-1  | 1.0E0     |
| Annotation Cluster 23    |                 | Enrichment Score: 0.26                                                     | <b>G</b> |  | Count | P_Value | Benjamini |
| <input type="checkbox"/> | SP_PIR_KEYWORDS | <a href="#">zinc</a>                                                       | RT       |  | 13    | 3.0E-1  | 9.4E-1    |
| <input type="checkbox"/> | GOTERM_MF_FAT   | <a href="#">zinc ion binding</a>                                           | RT       |  | 21    | 4.4E-1  | 9.9E-1    |
| <input type="checkbox"/> | SP_PIR_KEYWORDS | <a href="#">metal-binding</a>                                              | RT       |  | 15    | 4.6E-1  | 9.6E-1    |
| <input type="checkbox"/> | GOTERM_MF_FAT   | <a href="#">transition metal ion binding</a>                               | RT       |  | 23    | 6.4E-1  | 1.0E0     |
| <input type="checkbox"/> | GOTERM_MF_FAT   | <a href="#">metal ion binding</a>                                          | RT       |  | 30    | 7.3E-1  | 1.0E0     |
| <input type="checkbox"/> | GOTERM_MF_FAT   | <a href="#">cation binding</a>                                             | RT       |  | 30    | 7.6E-1  | 1.0E0     |
| <input type="checkbox"/> | GOTERM_MF_FAT   | <a href="#">ion binding</a>                                                | RT       |  | 30    | 7.6E-1  | 1.0E0     |
| Annotation Cluster 24    |                 | Enrichment Score: 0.25                                                     | <b>G</b> |  | Count | P_Value | Benjamini |
| <input type="checkbox"/> | GOTERM_BP_FAT   | <a href="#">sensory organ development</a>                                  | RT       |  | 4     | 5.3E-1  | 1.0E0     |
| <input type="checkbox"/> | GOTERM_BP_FAT   | <a href="#">eye development</a>                                            | RT       |  | 3     | 5.8E-1  | 1.0E0     |
| <input type="checkbox"/> | GOTERM_BP_FAT   | <a href="#">embryonic morphogenesis</a>                                    | RT       |  | 4     | 5.8E-1  | 1.0E0     |
| Annotation Cluster 25    |                 | Enrichment Score: 0.22                                                     | <b>G</b> |  | Count | P_Value | Benjamini |
| <input type="checkbox"/> | INTERPRO        | <a href="#">WD40 repeat, conserved site</a>                                | RT       |  | 4     | 2.9E-1  | 1.0E0     |
| <input type="checkbox"/> | SP_PIR_KEYWORDS | <a href="#">wd repeat</a>                                                  | RT       |  | 3     | 6.5E-1  | 9.9E-1    |
| <input type="checkbox"/> | INTERPRO        | <a href="#">WD40 repeat</a>                                                | RT       |  | 3     | 7.1E-1  | 1.0E0     |
| <input type="checkbox"/> | INTERPRO        | <a href="#">WD40/YVTN repeat-like</a>                                      | RT       |  | 3     | 7.7E-1  | 1.0E0     |
| <input type="checkbox"/> | SMART           | <a href="#">WD40</a>                                                       | RT       |  | 3     | 7.8E-1  | 1.0E0     |
| Annotation Cluster 26    |                 | Enrichment Score: 0.21                                                     | <b>G</b> |  | Count | P_Value | Benjamini |
| <input type="checkbox"/> | GOTERM_BP_FAT   | <a href="#">protein localization</a>                                       | RT       |  | 6     | 4.1E-1  | 1.0E0     |
| <input type="checkbox"/> | GOTERM_BP_FAT   | <a href="#">establishment of protein localization</a>                      | RT       |  | 4     | 7.6E-1  | 1.0E0     |
| <input type="checkbox"/> | GOTERM_BP_FAT   | <a href="#">protein transport</a>                                          | RT       |  | 4     | 7.6E-1  | 1.0E0     |
| Annotation Cluster 27    |                 | Enrichment Score: 0.11                                                     | <b>G</b> |  | Count | P_Value | Benjamini |
| <input type="checkbox"/> | GOTERM_MF_FAT   | <a href="#">endopeptidase activity</a>                                     | RT       |  | 4     | 7.4E-1  | 1.0E0     |
| <input type="checkbox"/> | GOTERM_BP_FAT   | <a href="#">proteolysis</a>                                                | RT       |  | 7     | 7.5E-1  | 1.0E0     |
| <input type="checkbox"/> | GOTERM_MF_FAT   | <a href="#">peptidase activity, acting on L-amino acid peptides</a>        | RT       |  | 5     | 8.0E-1  | 1.0E0     |

| <input type="checkbox"/> | Annotation Cluster 28 | Enrichment Score: 0.05                  | <b>G</b>           |  | Count | P_Value | Benjamini |
|--------------------------|-----------------------|-----------------------------------------|--------------------|-------------------------------------------------------------------------------------|-------|---------|-----------|
| <input type="checkbox"/> | GOTERM_MF_FAT         | <a href="#">peptidase activity</a>      | <a href="#">RT</a> |      | 5     | 8.3E-1  | 1.0E0     |
| <input type="checkbox"/> | SP_PIR_KEYWORDS       | <a href="#">glycoprotein</a>            | <a href="#">RT</a> |    | 5     | 5.8E-1  | 9.8E-1    |
| <input type="checkbox"/> | UP_SEQ_FEATURE        | glycosylation site:N-linked (GlcNAc...) | <a href="#">RT</a> |    | 5     | 7.6E-1  | 1.0E0     |
| <input type="checkbox"/> | SP_PIR_KEYWORDS       | <a href="#">membrane</a>                | <a href="#">RT</a> |    | 15    | 9.3E-1  | 1.0E0     |
| <input type="checkbox"/> | UP_SEQ_FEATURE        | topological domain:Cytoplasmic          | <a href="#">RT</a> |    | 3     | 9.4E-1  | 1.0E0     |
| <input type="checkbox"/> | UP_SEQ_FEATURE        | transmembrane region                    | <a href="#">RT</a> |    | 6     | 9.7E-1  | 1.0E0     |
| <input type="checkbox"/> | GOTERM_CC_FAT         | <a href="#">intrinsic to membrane</a>   | <a href="#">RT</a> |    | 16    | 9.9E-1  | 1.0E0     |
| <input type="checkbox"/> | GOTERM_CC_FAT         | <a href="#">integral to membrane</a>    | <a href="#">RT</a> |    | 15    | 1.0E0   | 1.0E0     |
| <input type="checkbox"/> | SP_PIR_KEYWORDS       | <a href="#">transmembrane</a>           | <a href="#">RT</a> |    | 10    | 1.0E0   | 1.0E0     |

59 terms were not clustered.

Please cite [Nature Protocols 2009: 4\(1\):44](#) & [Genome Biology 2003: 4\(5\):P3](#) within any publication that makes use of any methods inspired by DAVID.

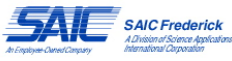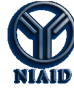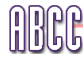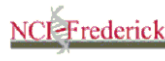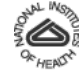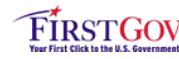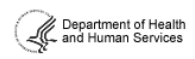

[Term of Service](#) | [Contact Us](#) | [Site Map](#)
