# Supplementary material for: Natural Variation in Fish Transcriptomes: Comparative Analysis of the Fathead Minnow (Pimephales promelas) and Zebrafish (Danio rerio)
Source: PubMed Central journal article supplement (PMC4262388; doi:10.1371/journal.pone.0114178), 2014-12-10
Supplement: pone.0114178.s003.pdf [file pone.0114178.s003.pdf]

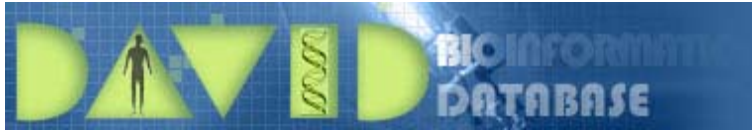

**DAVID Bioinformatics Resources 6.7**  
National Institute of Allergy and Infectious Diseases (NIAID), NIH

## Functional Annotation Clustering

[Help and Manual](#)

**Current Gene List: BetweenBatch\_DREtop100byFpvalueCombined.uniq\_015064\_D\_AA\_20131128.NCBIds**

**Current Background: Danio rerio**

**102 DAVID IDs**

**Options**      **Classification Stringency** Medium ▼

Rerun using options

Create Sublist

### 7 Cluster(s)

[Download File](#)

| Annotation Cluster 1     |                 | Enrichment Score: 2.52                                       | <b>G</b>           |  | Count | P_Value | Benjamini |
|--------------------------|-----------------|--------------------------------------------------------------|--------------------|--|-------|---------|-----------|
| <input type="checkbox"/> | INTERPRO        | <a href="#">Nucleotide-binding, alpha-beta plait</a>         | <a href="#">RT</a> |  | 7     | 7.6E-4  | 1.5E-1    |
| <input type="checkbox"/> | SMART           | <a href="#">RRM</a>                                          | <a href="#">RT</a> |  | 6     | 2.1E-3  | 8.4E-2    |
| <input type="checkbox"/> | INTERPRO        | <a href="#">RNA recognition motif, RNP-1</a>                 | <a href="#">RT</a> |  | 6     | 4.9E-3  | 4.0E-1    |
| <input type="checkbox"/> | KEGG_PATHWAY    | <a href="#">Spliceosome</a>                                  | <a href="#">RT</a> |  | 5     | 1.1E-2  | 3.0E-1    |
| Annotation Cluster 2     |                 | Enrichment Score: 1.25                                       | <b>G</b>           |  | Count | P_Value | Benjamini |
| <input type="checkbox"/> | SP_PIR_KEYWORDS | <a href="#">ribonucleoprotein</a>                            | <a href="#">RT</a> |  | 6     | 1.2E-3  | 8.6E-2    |
| <input type="checkbox"/> | GOTERM_CC_FAT   | <a href="#">ribonucleoprotein complex</a>                    | <a href="#">RT</a> |  | 7     | 1.4E-2  | 7.1E-1    |
| <input type="checkbox"/> | SP_PIR_KEYWORDS | <a href="#">viral nucleoprotein</a>                          | <a href="#">RT</a> |  | 3     | 2.2E-2  | 4.2E-1    |
| <input type="checkbox"/> | GOTERM_BP_FAT   | <a href="#">translation</a>                                  | <a href="#">RT</a> |  | 5     | 4.5E-2  | 9.9E-1    |
| <input type="checkbox"/> | SP_PIR_KEYWORDS | <a href="#">ribosomal protein</a>                            | <a href="#">RT</a> |  | 4     | 5.6E-2  | 6.6E-1    |
| <input type="checkbox"/> | GOTERM_MF_FAT   | <a href="#">structural molecule activity</a>                 | <a href="#">RT</a> |  | 6     | 7.2E-2  | 9.9E-1    |
| <input type="checkbox"/> | GOTERM_MF_FAT   | <a href="#">structural constituent of ribosome</a>           | <a href="#">RT</a> |  | 4     | 7.7E-2  | 9.6E-1    |
| <input type="checkbox"/> | GOTERM_CC_FAT   | <a href="#">non-membrane-bounded organelle</a>               | <a href="#">RT</a> |  | 9     | 1.3E-1  | 1.0E0     |
| <input type="checkbox"/> | GOTERM_CC_FAT   | <a href="#">intracellular non-membrane-bounded organelle</a> | <a href="#">RT</a> |  | 9     | 1.3E-1  | 1.0E0     |
| <input type="checkbox"/> | KEGG_PATHWAY    | <a href="#">Ribosome</a>                                     | <a href="#">RT</a> |  | 3     | 1.3E-1  | 7.8E-1    |
| <input type="checkbox"/> | GOTERM_CC_FAT   | <a href="#">ribosome</a>                                     | <a href="#">RT</a> |  | 4     | 1.4E-1  | 9.9E-1    |

| <input type="checkbox"/> | Annotation Cluster 3 | Enrichment Score: 0.45                        | G  |  | Count | P_Value | Benjamini |
|--------------------------|----------------------|-----------------------------------------------|----|--|-------|---------|-----------|
| <input type="checkbox"/> | GOTERM_MF_FAT        | <a href="#">RNA binding</a>                   | RT |  | 3     | 5.6E-1  | 1.0E0     |
| <input type="checkbox"/> | GOTERM_MF_FAT        | <a href="#">nucleotide binding</a>            | RT |  | 19    | 3.6E-2  | 9.9E-1    |
| <input type="checkbox"/> | SP_PIR_KEYWORDS      | <a href="#">nucleotide-binding</a>            | RT |  | 9     | 3.4E-1  | 1.0E0     |
| <input type="checkbox"/> | SP_PIR_KEYWORDS      | <a href="#">atp-binding</a>                   | RT |  | 7     | 3.5E-1  | 9.9E-1    |
| <input type="checkbox"/> | GOTERM_MF_FAT        | <a href="#">ATP binding</a>                   | RT |  | 9     | 4.3E-1  | 1.0E0     |
| <input type="checkbox"/> | GOTERM_MF_FAT        | <a href="#">adenyl ribonucleotide binding</a> | RT |  | 9     | 4.4E-1  | 1.0E0     |
| <input type="checkbox"/> | GOTERM_MF_FAT        | <a href="#">purine ribonucleotide binding</a> | RT |  | 11    | 4.9E-1  | 1.0E0     |
| <input type="checkbox"/> | GOTERM_MF_FAT        | <a href="#">ribonucleotide binding</a>        | RT |  | 11    | 4.9E-1  | 1.0E0     |
| <input type="checkbox"/> | GOTERM_MF_FAT        | <a href="#">adenyl nucleotide binding</a>     | RT |  | 9     | 4.9E-1  | 1.0E0     |
| <input type="checkbox"/> | GOTERM_MF_FAT        | <a href="#">purine nucleoside binding</a>     | RT |  | 9     | 5.0E-1  | 1.0E0     |
| <input type="checkbox"/> | GOTERM_MF_FAT        | <a href="#">nucleoside binding</a>            | RT |  | 9     | 5.0E-1  | 1.0E0     |
| <input type="checkbox"/> | GOTERM_MF_FAT        | <a href="#">purine nucleotide binding</a>     | RT |  | 11    | 5.4E-1  | 1.0E0     |
|                          | Annotation Cluster 4 | Enrichment Score: 0.18                        | G  |  | Count | P_Value | Benjamini |
| <input type="checkbox"/> | SMART                | <a href="#">RING</a>                          | RT |  | 3     | 3.6E-1  | 1.0E0     |
| <input type="checkbox"/> | INTERPRO             | <a href="#">Zinc finger, RING-type</a>        | RT |  | 3     | 4.4E-1  | 1.0E0     |
| <input type="checkbox"/> | SP_PIR_KEYWORDS      | <a href="#">zinc</a>                          | RT |  | 7     | 4.6E-1  | 9.9E-1    |
| <input type="checkbox"/> | SP_PIR_KEYWORDS      | <a href="#">metal-binding</a>                 | RT |  | 7     | 7.4E-1  | 1.0E0     |
| <input type="checkbox"/> | SP_PIR_KEYWORDS      | <a href="#">zinc-finger</a>                   | RT |  | 3     | 7.5E-1  | 1.0E0     |
| <input type="checkbox"/> | GOTERM_MF_FAT        | <a href="#">cation binding</a>                | RT |  | 16    | 7.8E-1  | 1.0E0     |
| <input type="checkbox"/> | GOTERM_MF_FAT        | <a href="#">ion binding</a>                   | RT |  | 16    | 7.8E-1  | 1.0E0     |
| <input type="checkbox"/> | GOTERM_MF_FAT        | <a href="#">transition metal ion binding</a>  | RT |  | 11    | 8.3E-1  | 1.0E0     |
| <input type="checkbox"/> | GOTERM_MF_FAT        | <a href="#">zinc ion binding</a>              | RT |  | 9     | 8.3E-1  | 1.0E0     |
| <input type="checkbox"/> | GOTERM_MF_FAT        | <a href="#">metal ion binding</a>             | RT |  | 15    | 8.4E-1  | 1.0E0     |
|                          | Annotation Cluster 5 | Enrichment Score: 0.17                        | G  |  | Count | P_Value | Benjamini |
| <input type="checkbox"/> | SP_PIR_KEYWORDS      | <a href="#">gtp-binding</a>                   | RT |  | 3     | 5.6E-1  | 1.0E0     |
| <input type="checkbox"/> | GOTERM_MF_FAT        | <a href="#">GTP binding</a>                   | RT |  | 3     | 7.2E-1  | 1.0E0     |
| <input type="checkbox"/> | GOTERM_MF_FAT        | <a href="#">guanyl ribonucleotide binding</a> | RT |  | 3     | 7.3E-1  | 1.0E0     |
| <input type="checkbox"/> | GOTERM_MF_FAT        | <a href="#">guanyl nucleotide binding</a>     | RT |  | 3     | 7.3E-1  | 1.0E0     |
|                          | Annotation Cluster 6 | Enrichment Score: 0.13                        | G  |  | Count | P Value | Benjamini |

| <input type="checkbox"/> | Annotation                                                                  | RT | Count                  | P_Value | Benjamini |
|--------------------------|-----------------------------------------------------------------------------|----|------------------------|---------|-----------|
| <input type="checkbox"/> | UP_SEQ_FEATURE<br>transmembrane region                                      | RT | 7                      | 3.3E-1  | 1.0E0     |
| <input type="checkbox"/> | SP_PIR_KEYWORDS<br><a href="#">membrane</a>                                 | RT | 10                     | 7.3E-1  | 1.0E0     |
| <input type="checkbox"/> | SP_PIR_KEYWORDS<br><a href="#">transmembrane</a>                            | RT | 9                      | 9.2E-1  | 1.0E0     |
| <input type="checkbox"/> | GOTERM_CC_FAT<br><a href="#">intrinsic to membrane</a>                      | RT | 11                     | 1.0E0   | 1.0E0     |
| <input type="checkbox"/> | GOTERM_CC_FAT<br><a href="#">integral to membrane</a>                       | RT | 10                     | 1.0E0   | 1.0E0     |
| Annotation Cluster 7     |                                                                             |    | Enrichment Score: 0.08 |         |           |
| <input type="checkbox"/> | SP_PIR_KEYWORDS<br><a href="#">nucleus</a>                                  | RT | 8                      | 7.1E-1  | 1.0E0     |
| <input type="checkbox"/> | GOTERM_BP_FAT<br><a href="#">transcription</a>                              | RT | 3                      | 7.6E-1  | 1.0E0     |
| <input type="checkbox"/> | GOTERM_BP_FAT<br><a href="#">regulation of transcription, DNA-dependent</a> | RT | 4                      | 8.2E-1  | 1.0E0     |
| <input type="checkbox"/> | GOTERM_BP_FAT<br><a href="#">regulation of RNA metabolic process</a>        | RT | 4                      | 8.2E-1  | 1.0E0     |
| <input type="checkbox"/> | GOTERM_BP_FAT<br><a href="#">regulation of transcription</a>                | RT | 5                      | 8.4E-1  | 1.0E0     |
| <input type="checkbox"/> | SP_PIR_KEYWORDS<br><a href="#">dna-binding</a>                              | RT | 4                      | 8.5E-1  | 1.0E0     |
| <input type="checkbox"/> | GOTERM_MF_FAT<br><a href="#">transcription regulator activity</a>           | RT | 5                      | 8.8E-1  | 1.0E0     |
| <input type="checkbox"/> | GOTERM_MF_FAT<br><a href="#">DNA binding</a>                                | RT | 6                      | 9.3E-1  | 1.0E0     |
| <input type="checkbox"/> | GOTERM_MF_FAT<br><a href="#">transcription factor activity</a>              | RT | 3                      | 9.5E-1  | 1.0E0     |

24 terms were not clustered.

Please cite [Nature Protocols 2009; 4\(1\):44](#) & [Genome Biology 2003; 4\(5\):P3](#) within any publication that makes use of any methods inspired by **DAVID**.

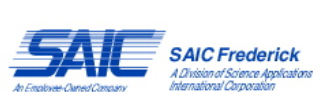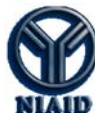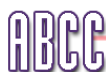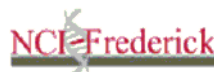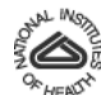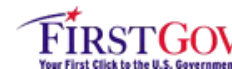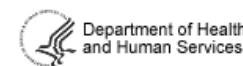

[Term of Service](#) | [Contact Us](#) | [Site Map](#)
