# Supplementary material for: Natural Variation in Fish Transcriptomes: Comparative Analysis of the Fathead Minnow (Pimephales promelas) and Zebrafish (Danio rerio)
Source: PubMed Central journal article supplement (PMC4262388; doi:10.1371/journal.pone.0114178), 2014-12-10
Supplement: pone.0114178.s007.pdf [file pone.0114178.s007.pdf]

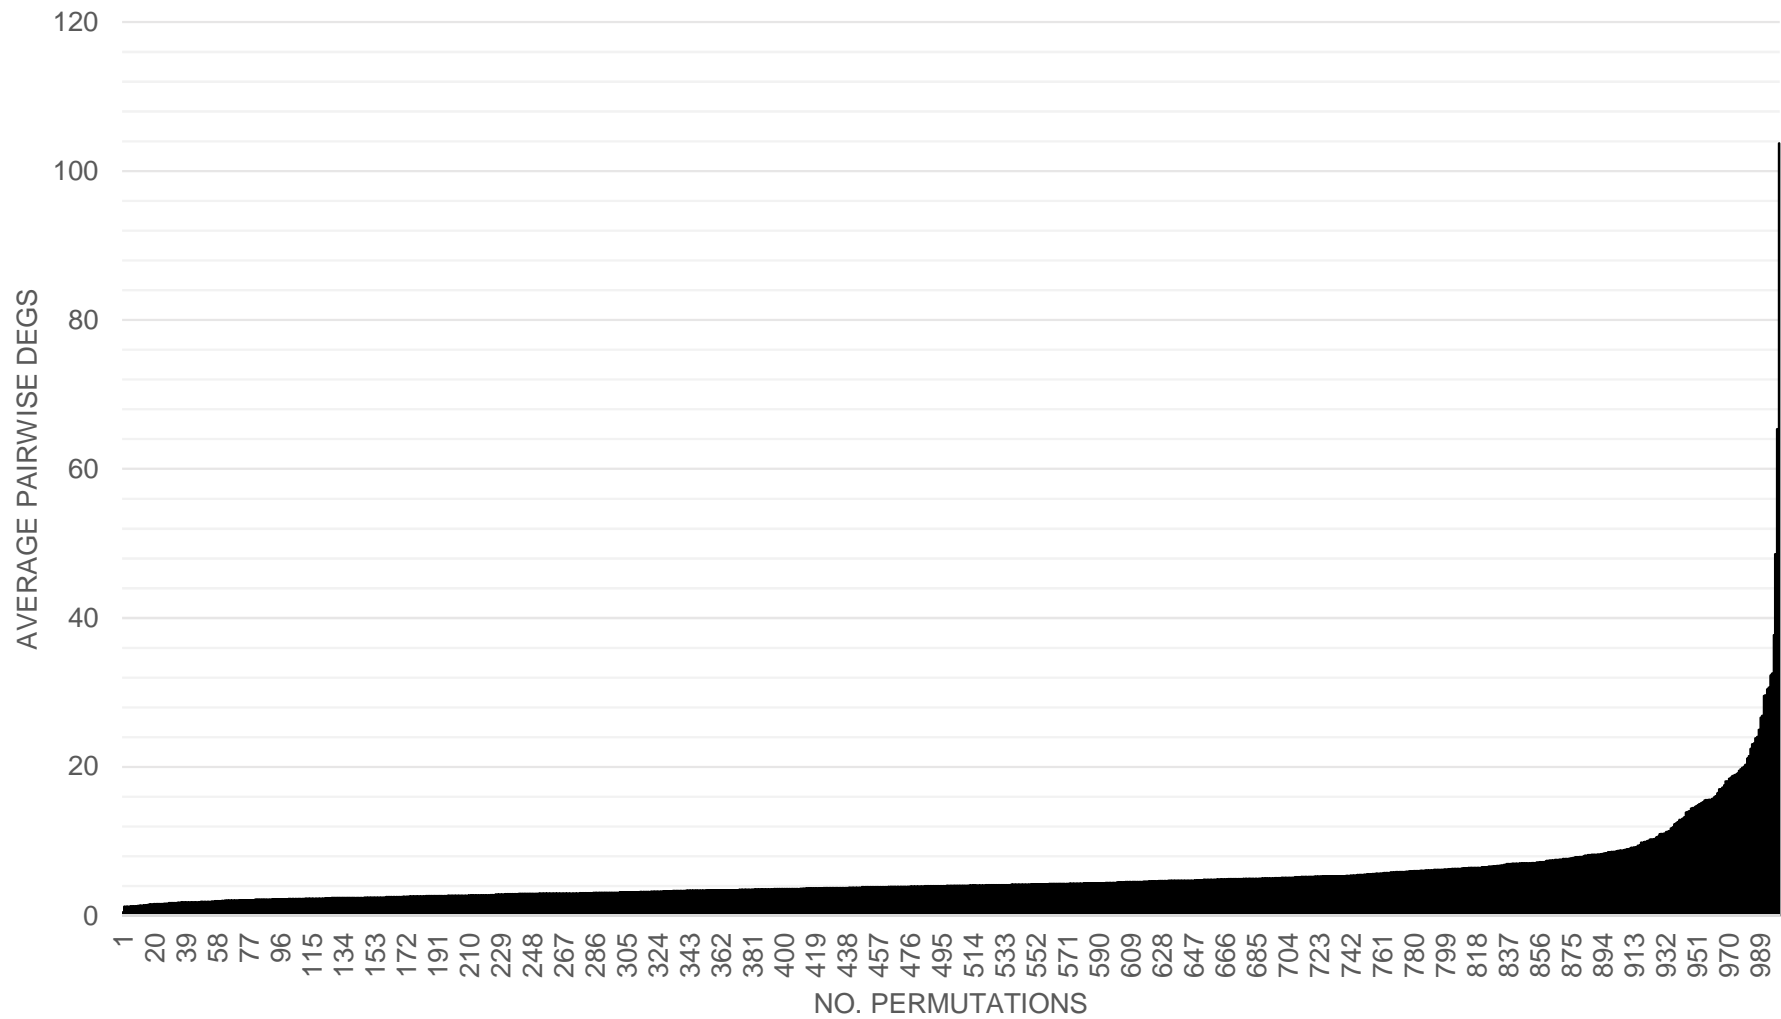

Figure S1A

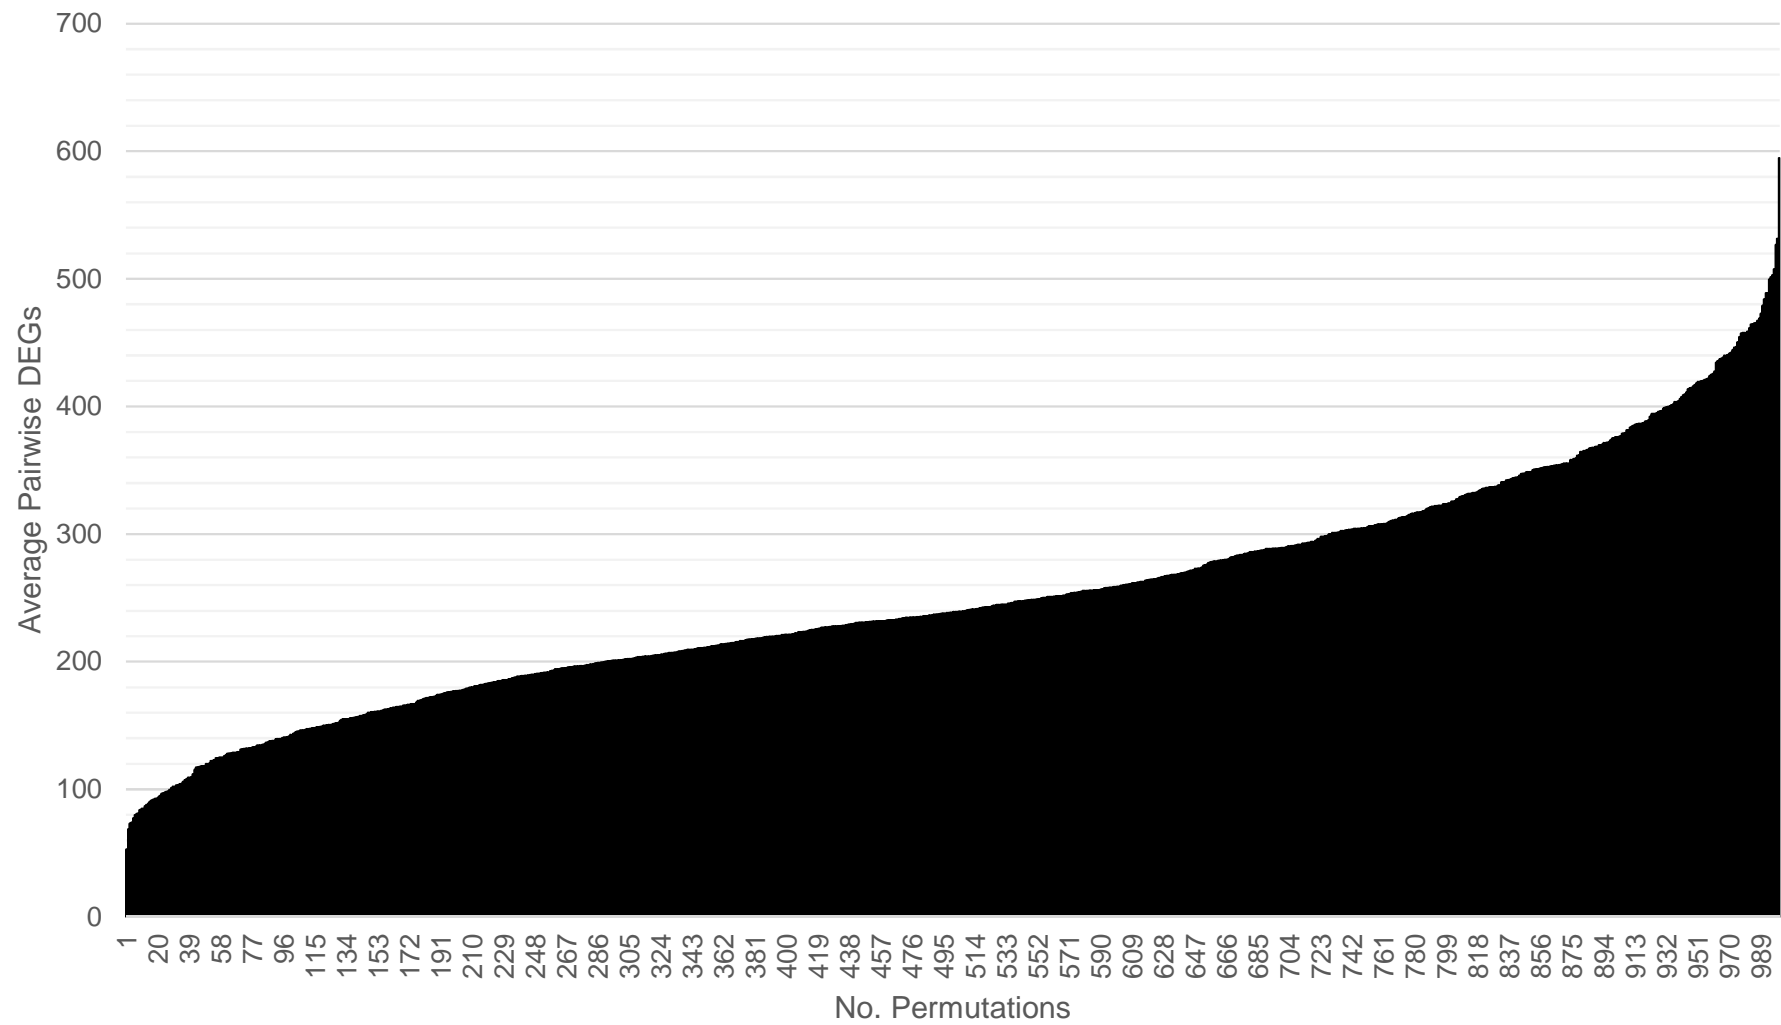

Figure S1B
