# Supplementary material for: Natural Variation in Fish Transcriptomes: Comparative Analysis of the Fathead Minnow (Pimephales promelas) and Zebrafish (Danio rerio)
Source: PubMed Central journal article supplement (PMC4262388; doi:10.1371/journal.pone.0114178), 2014-12-10

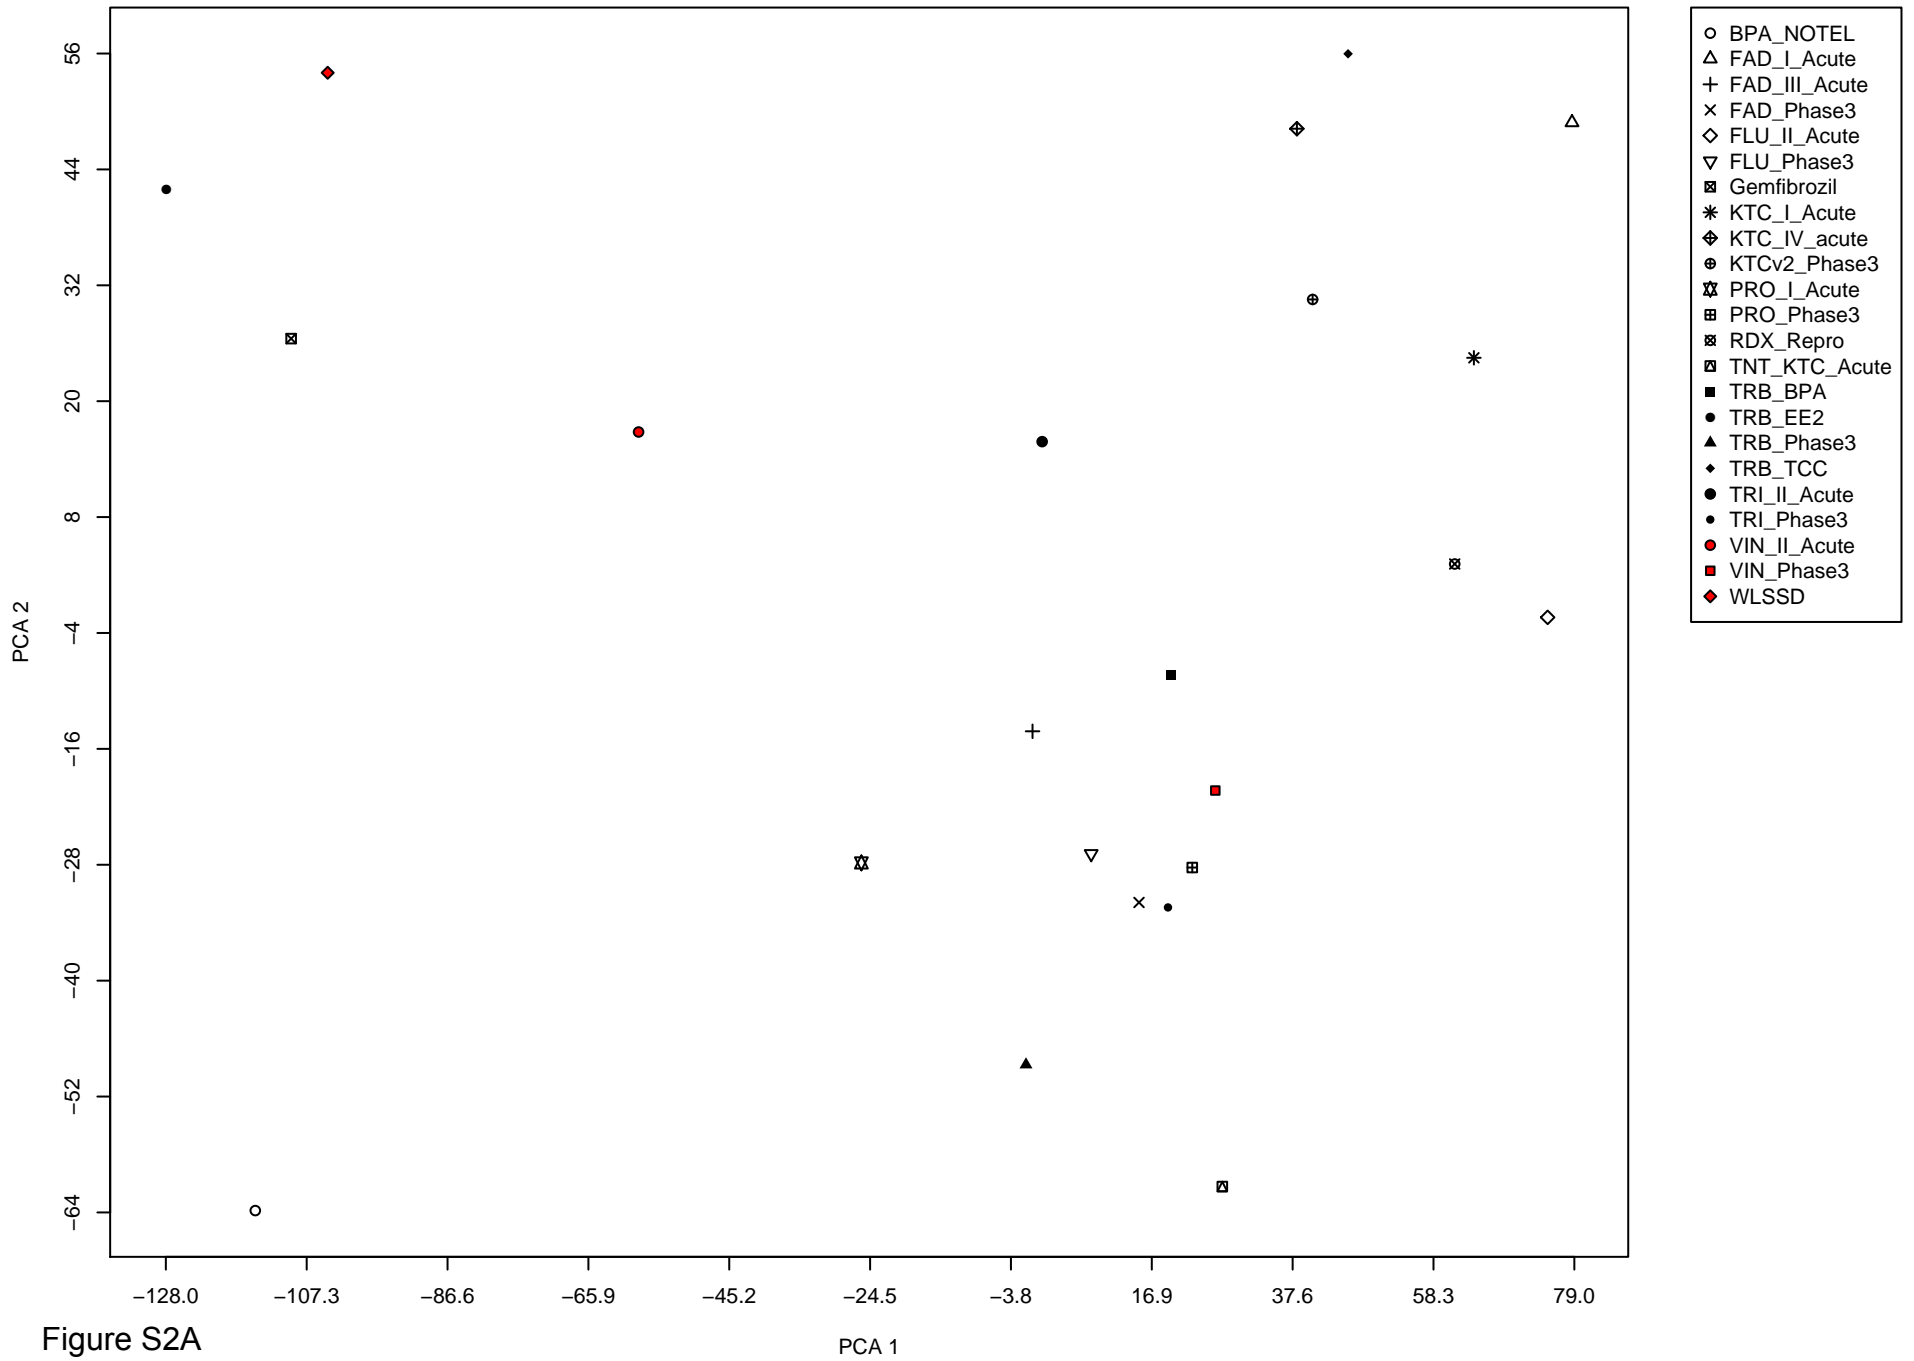

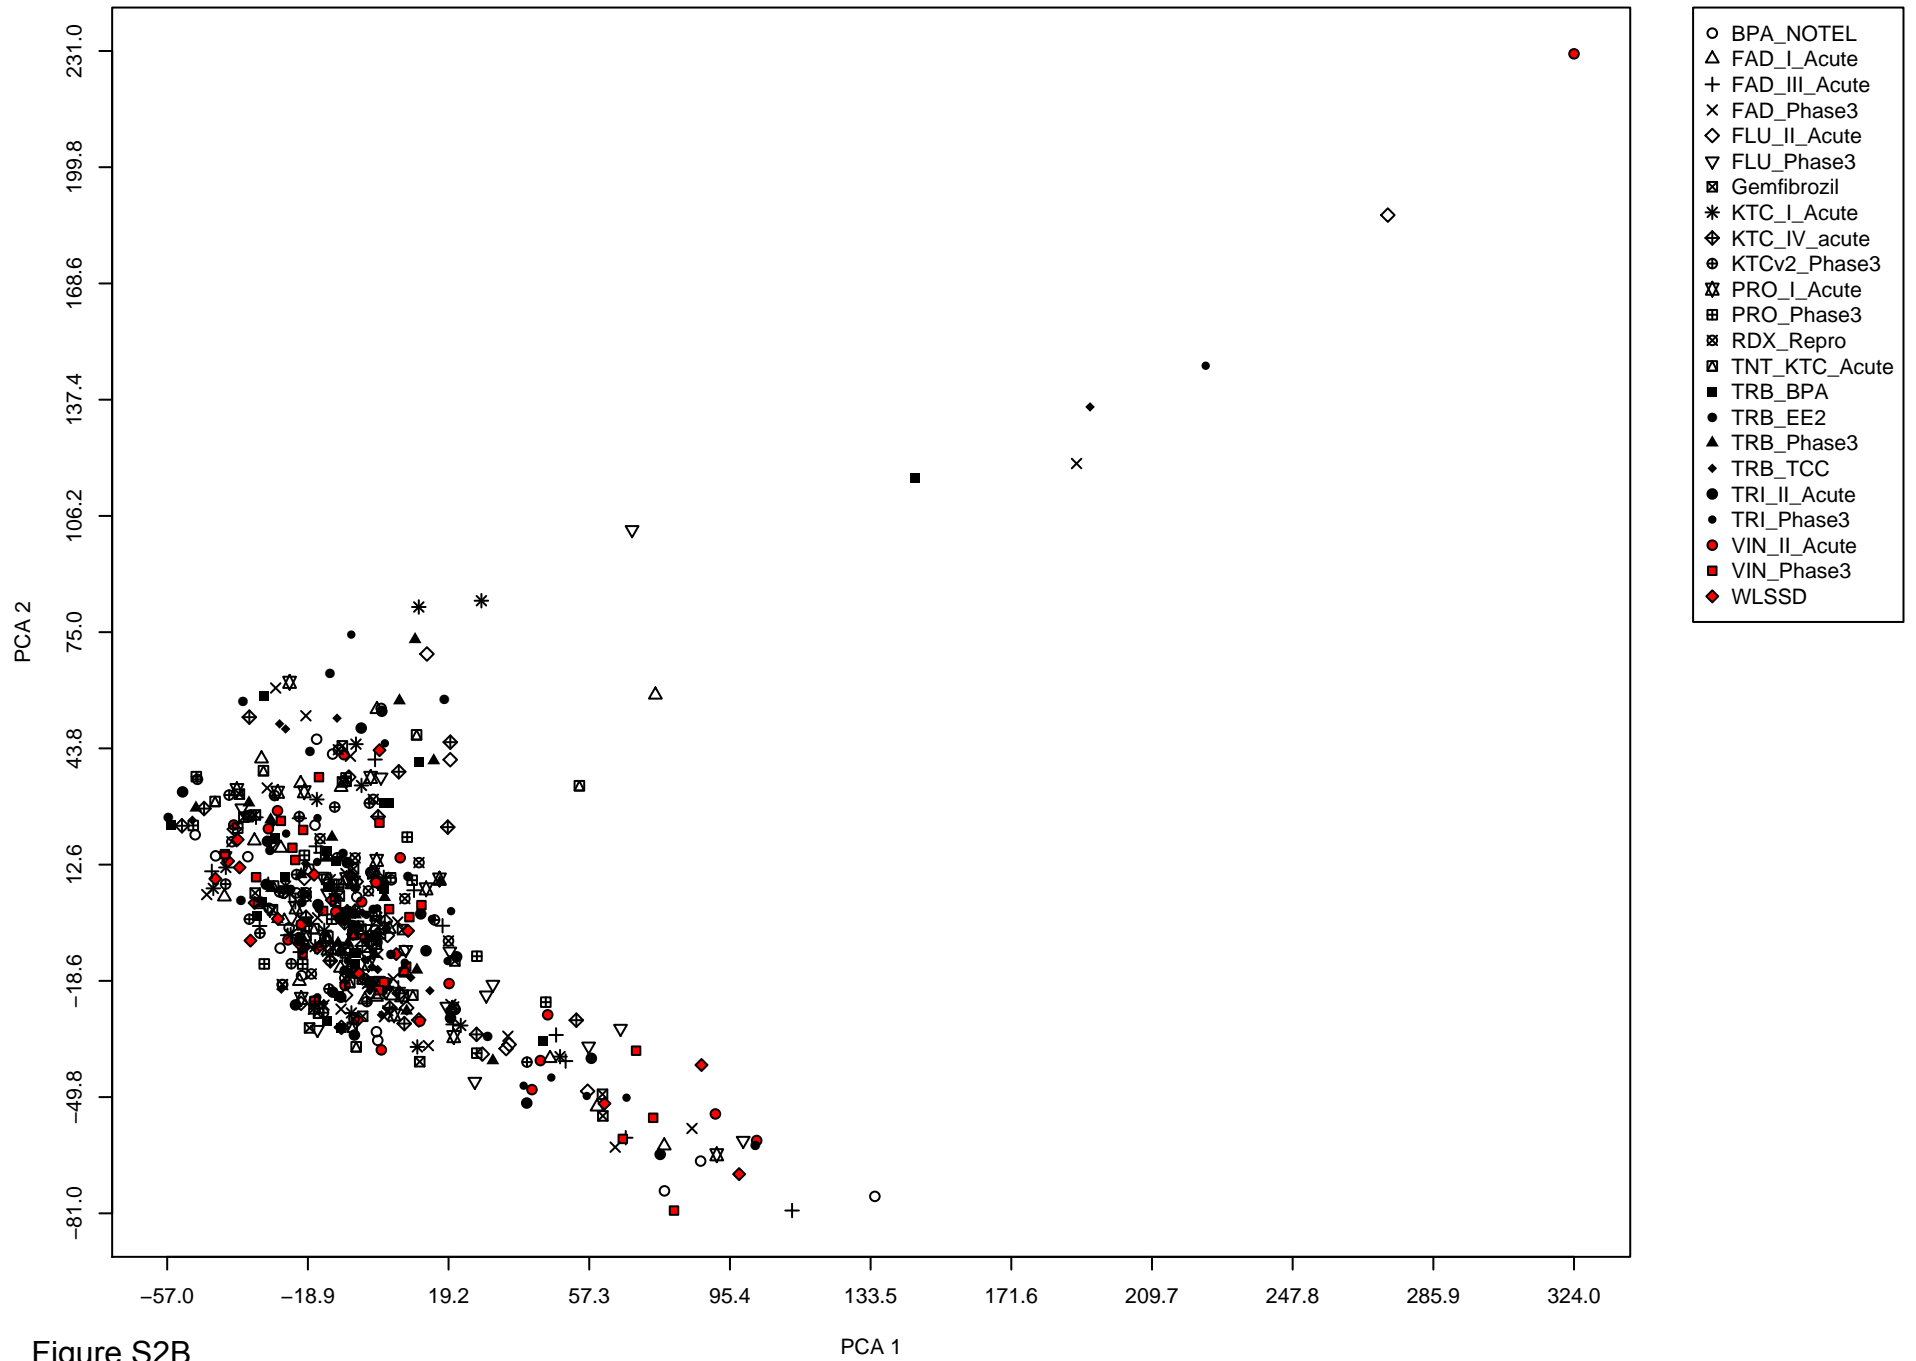

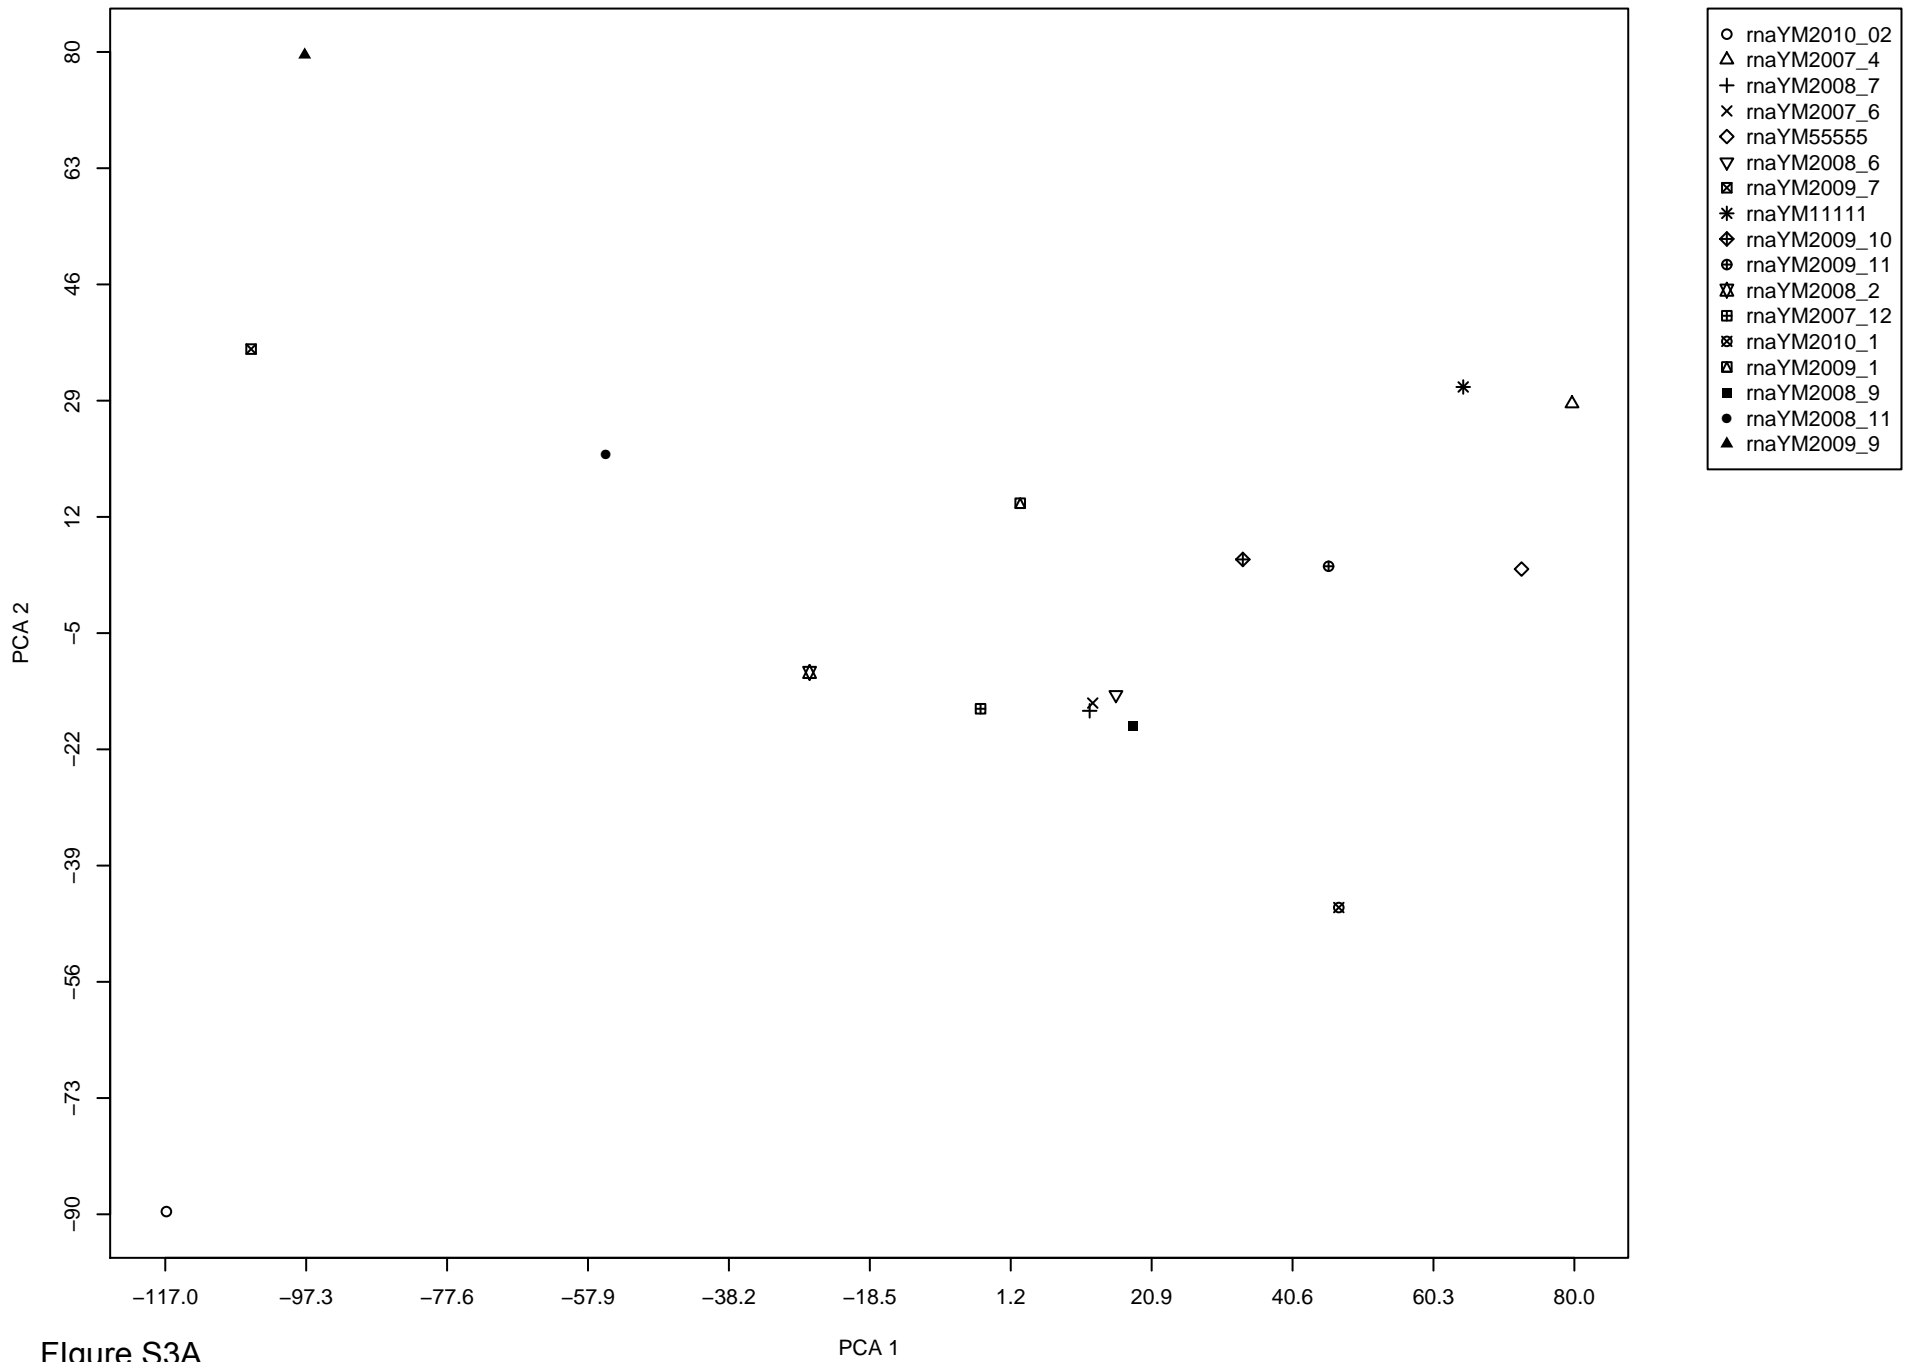

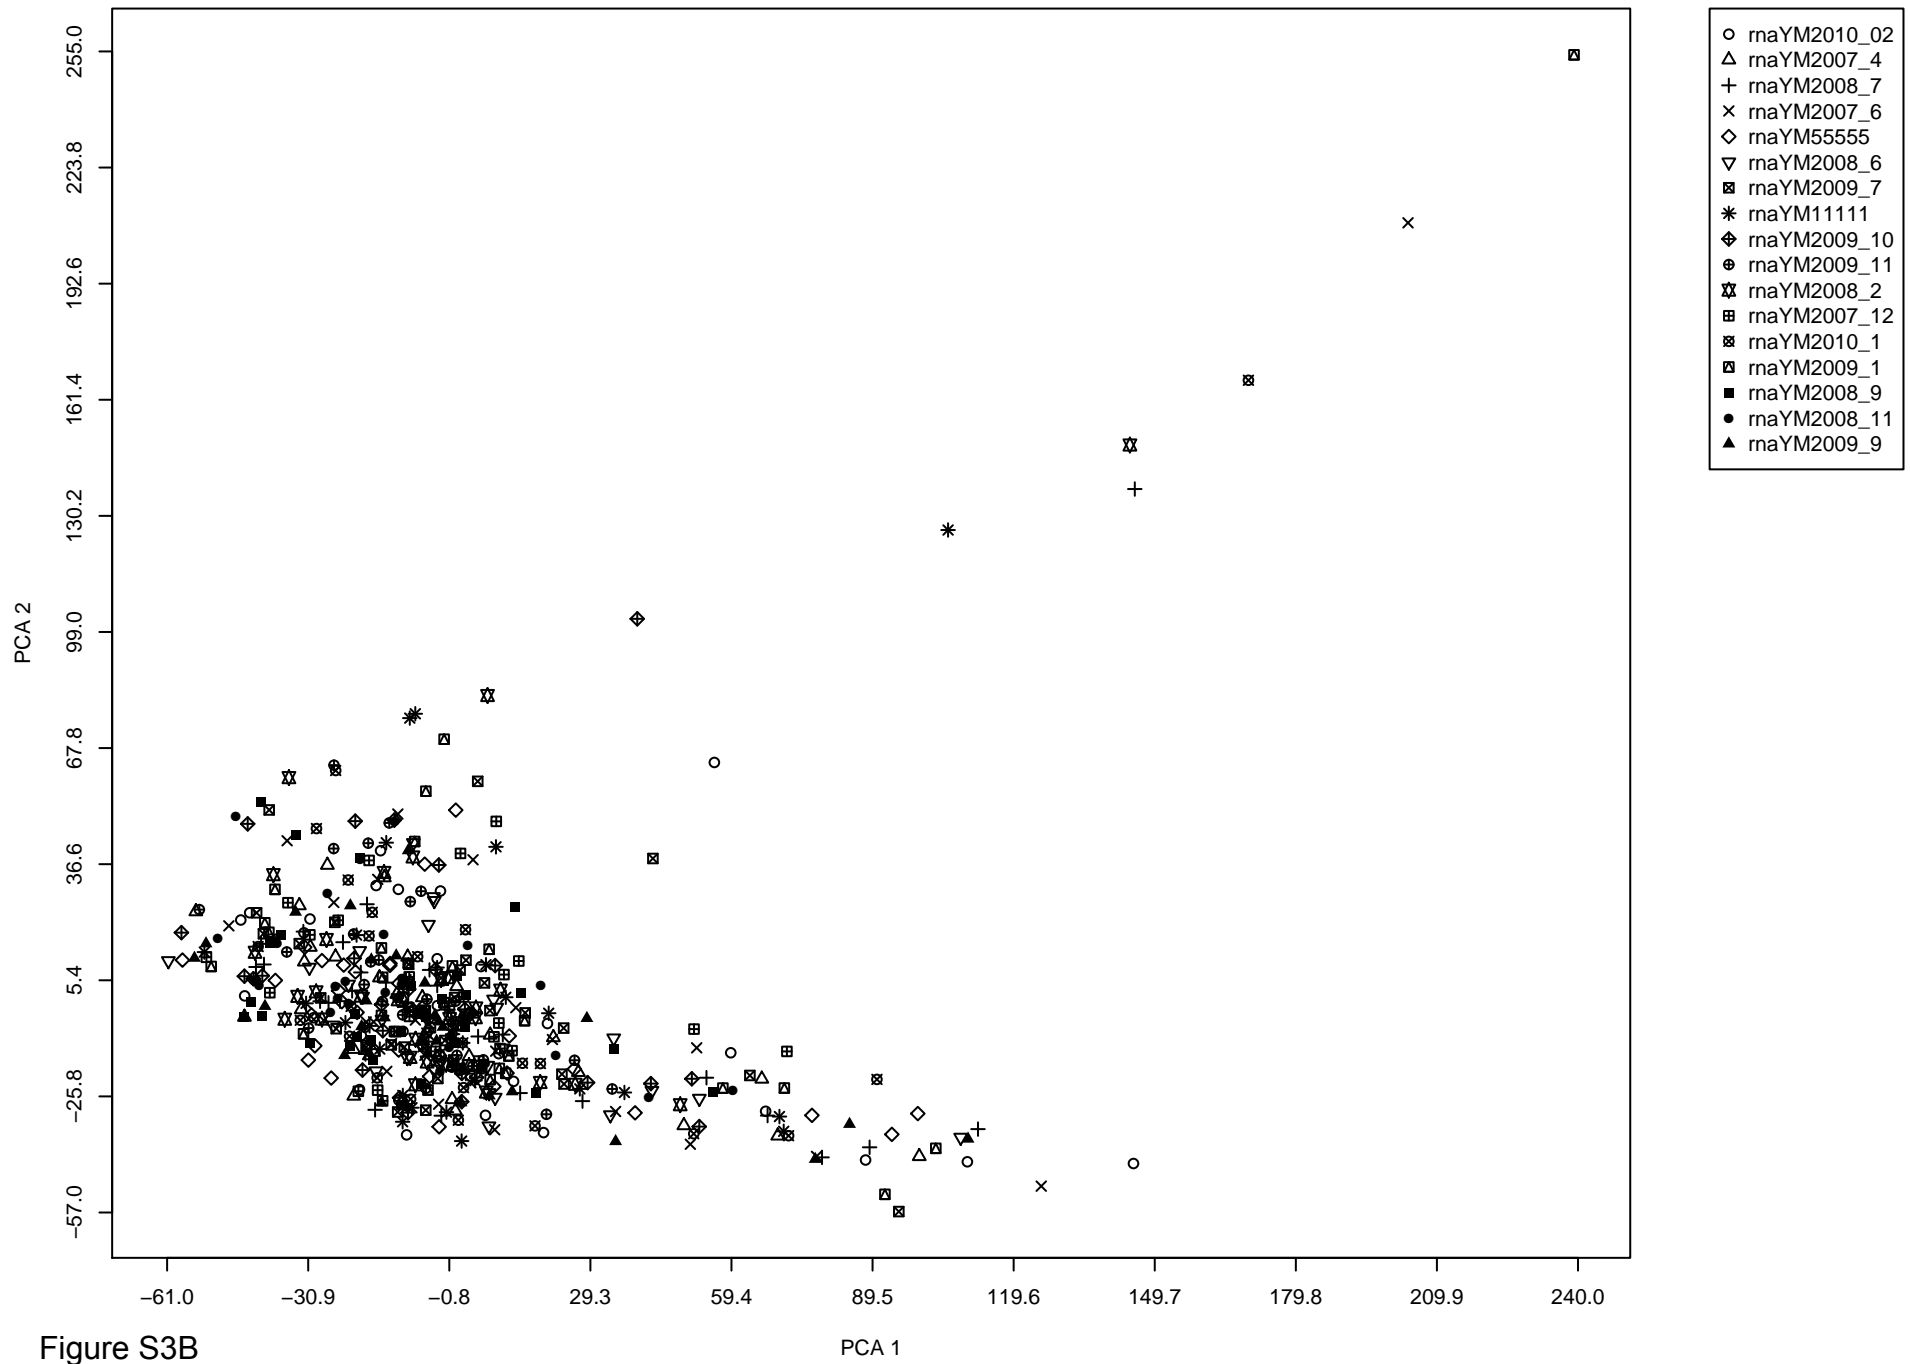

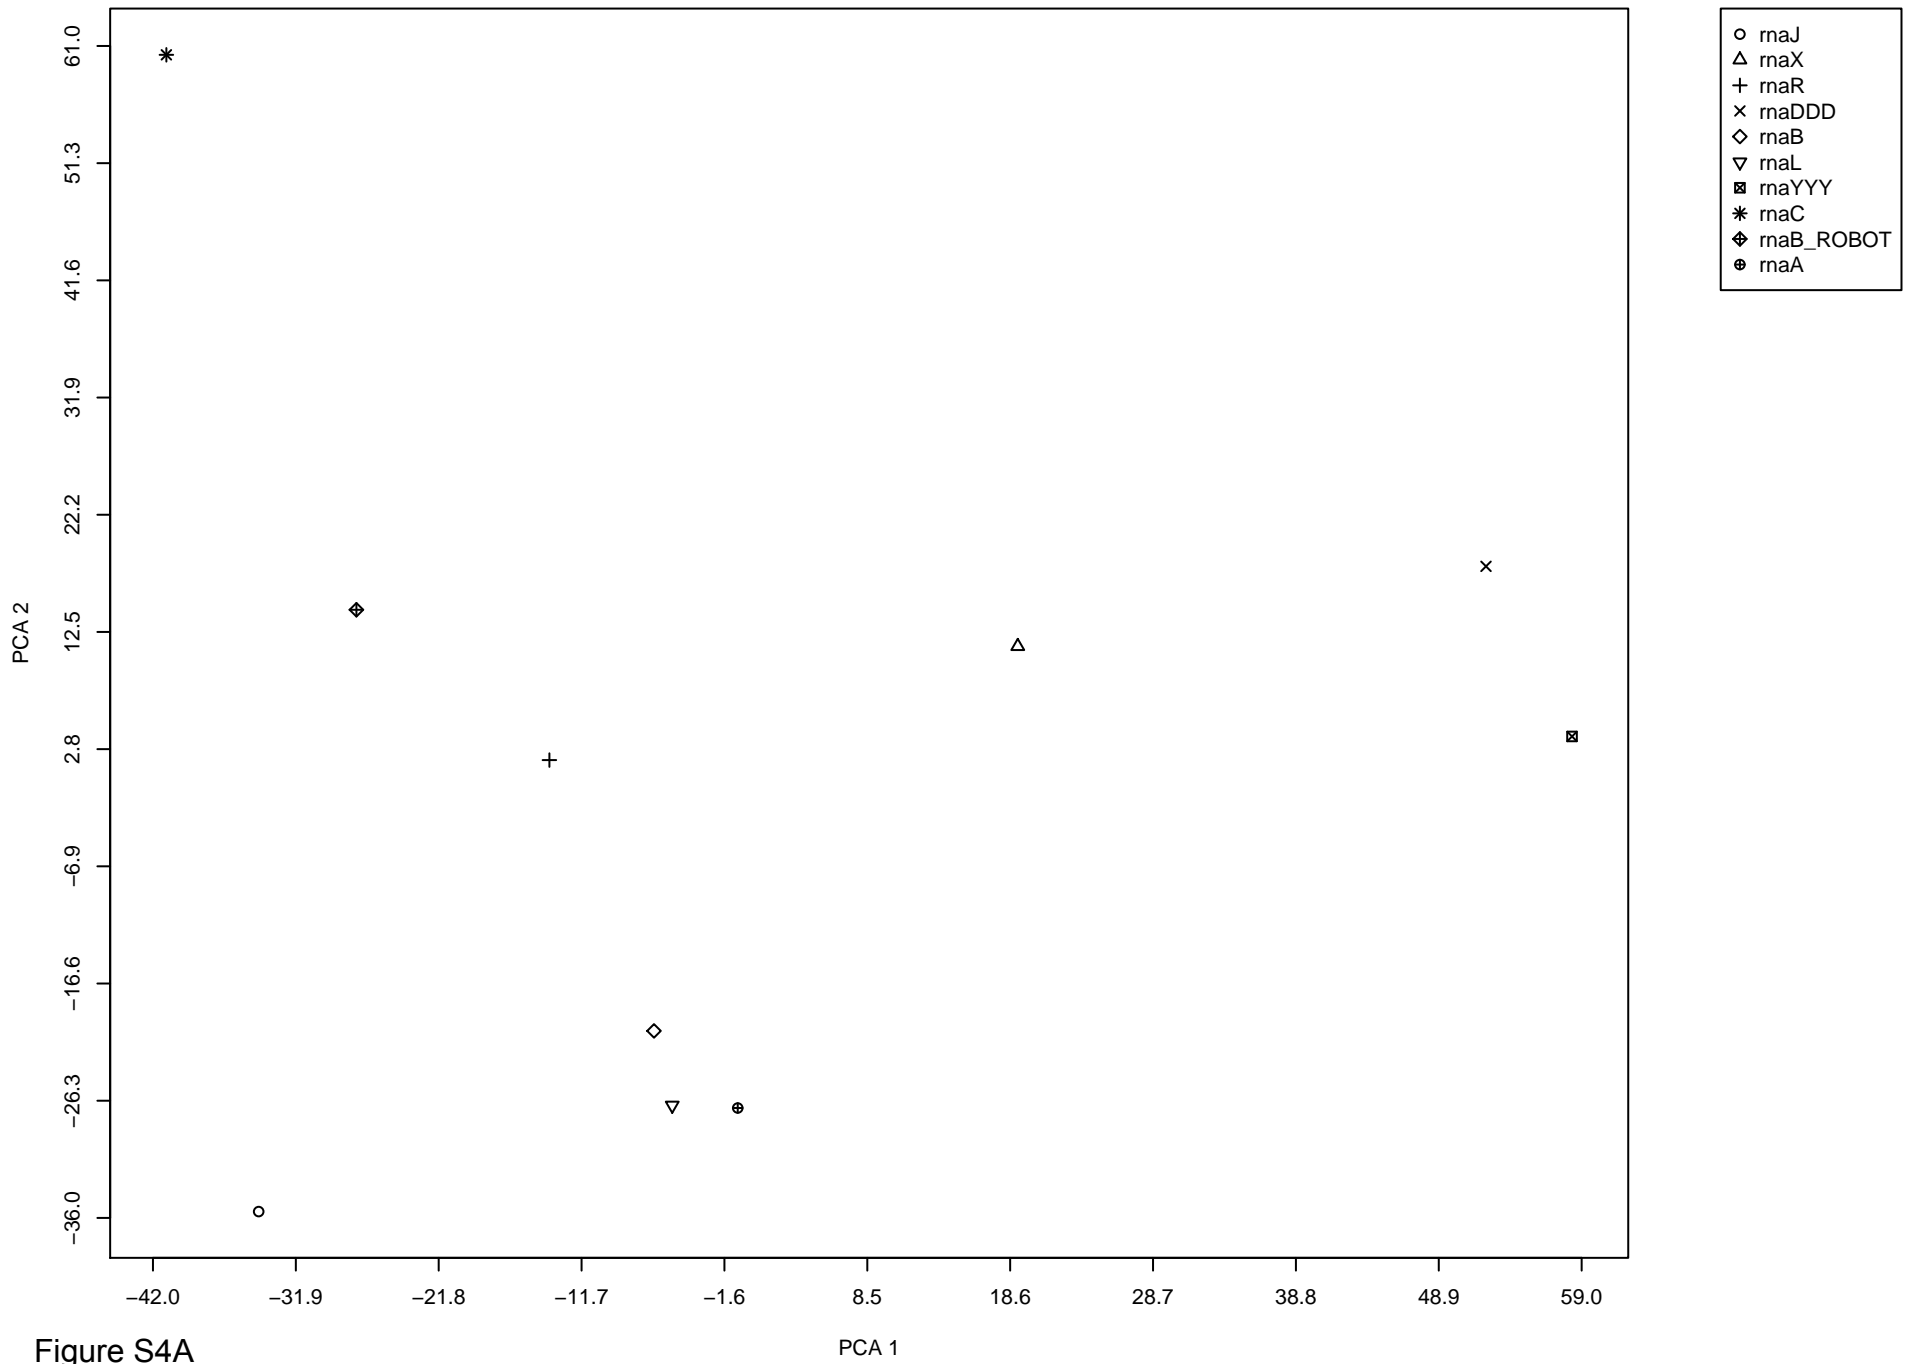

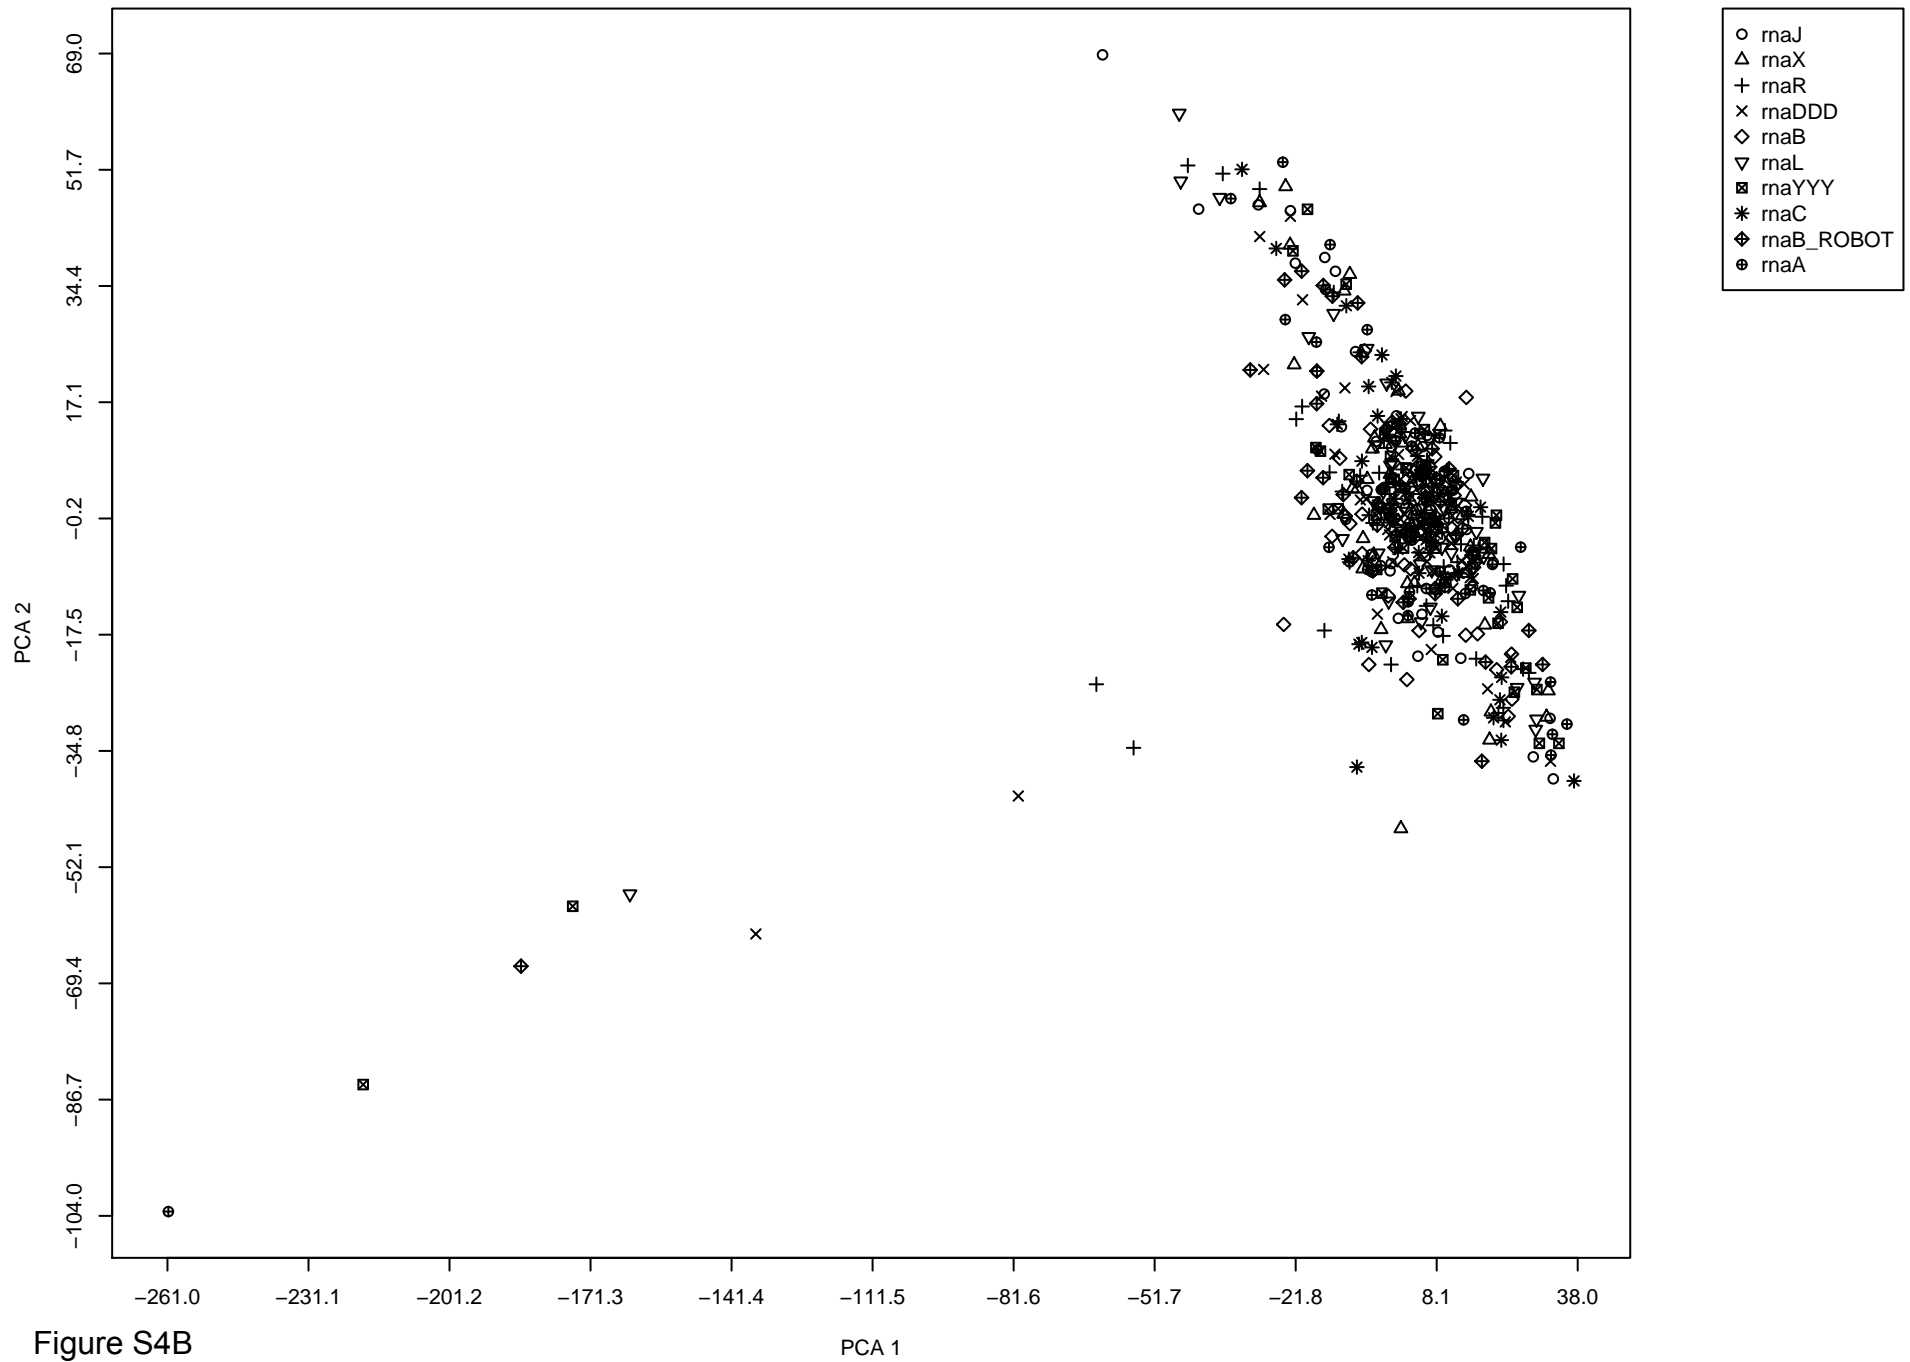

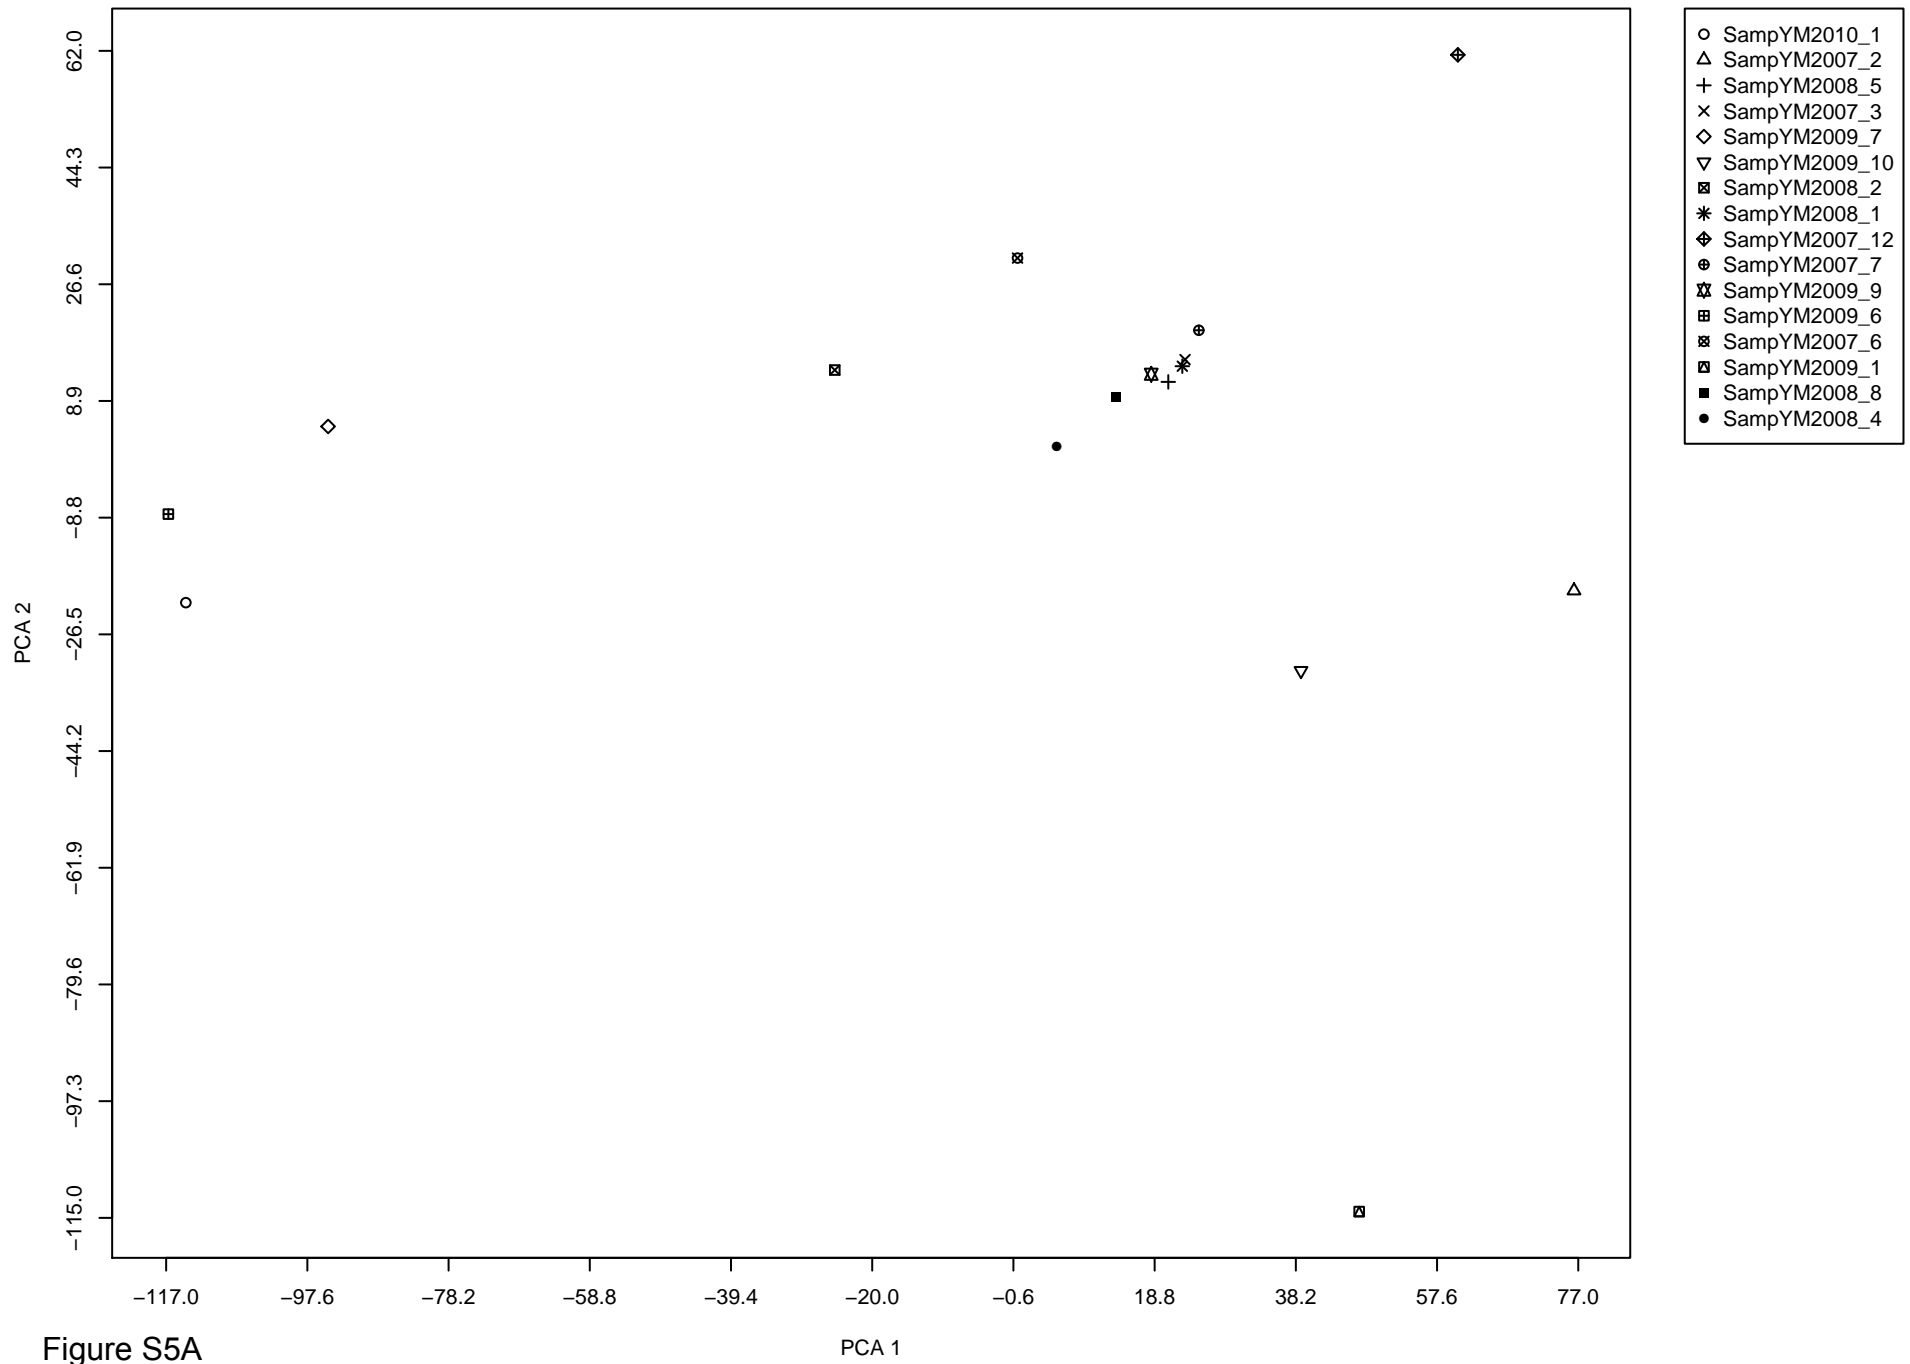

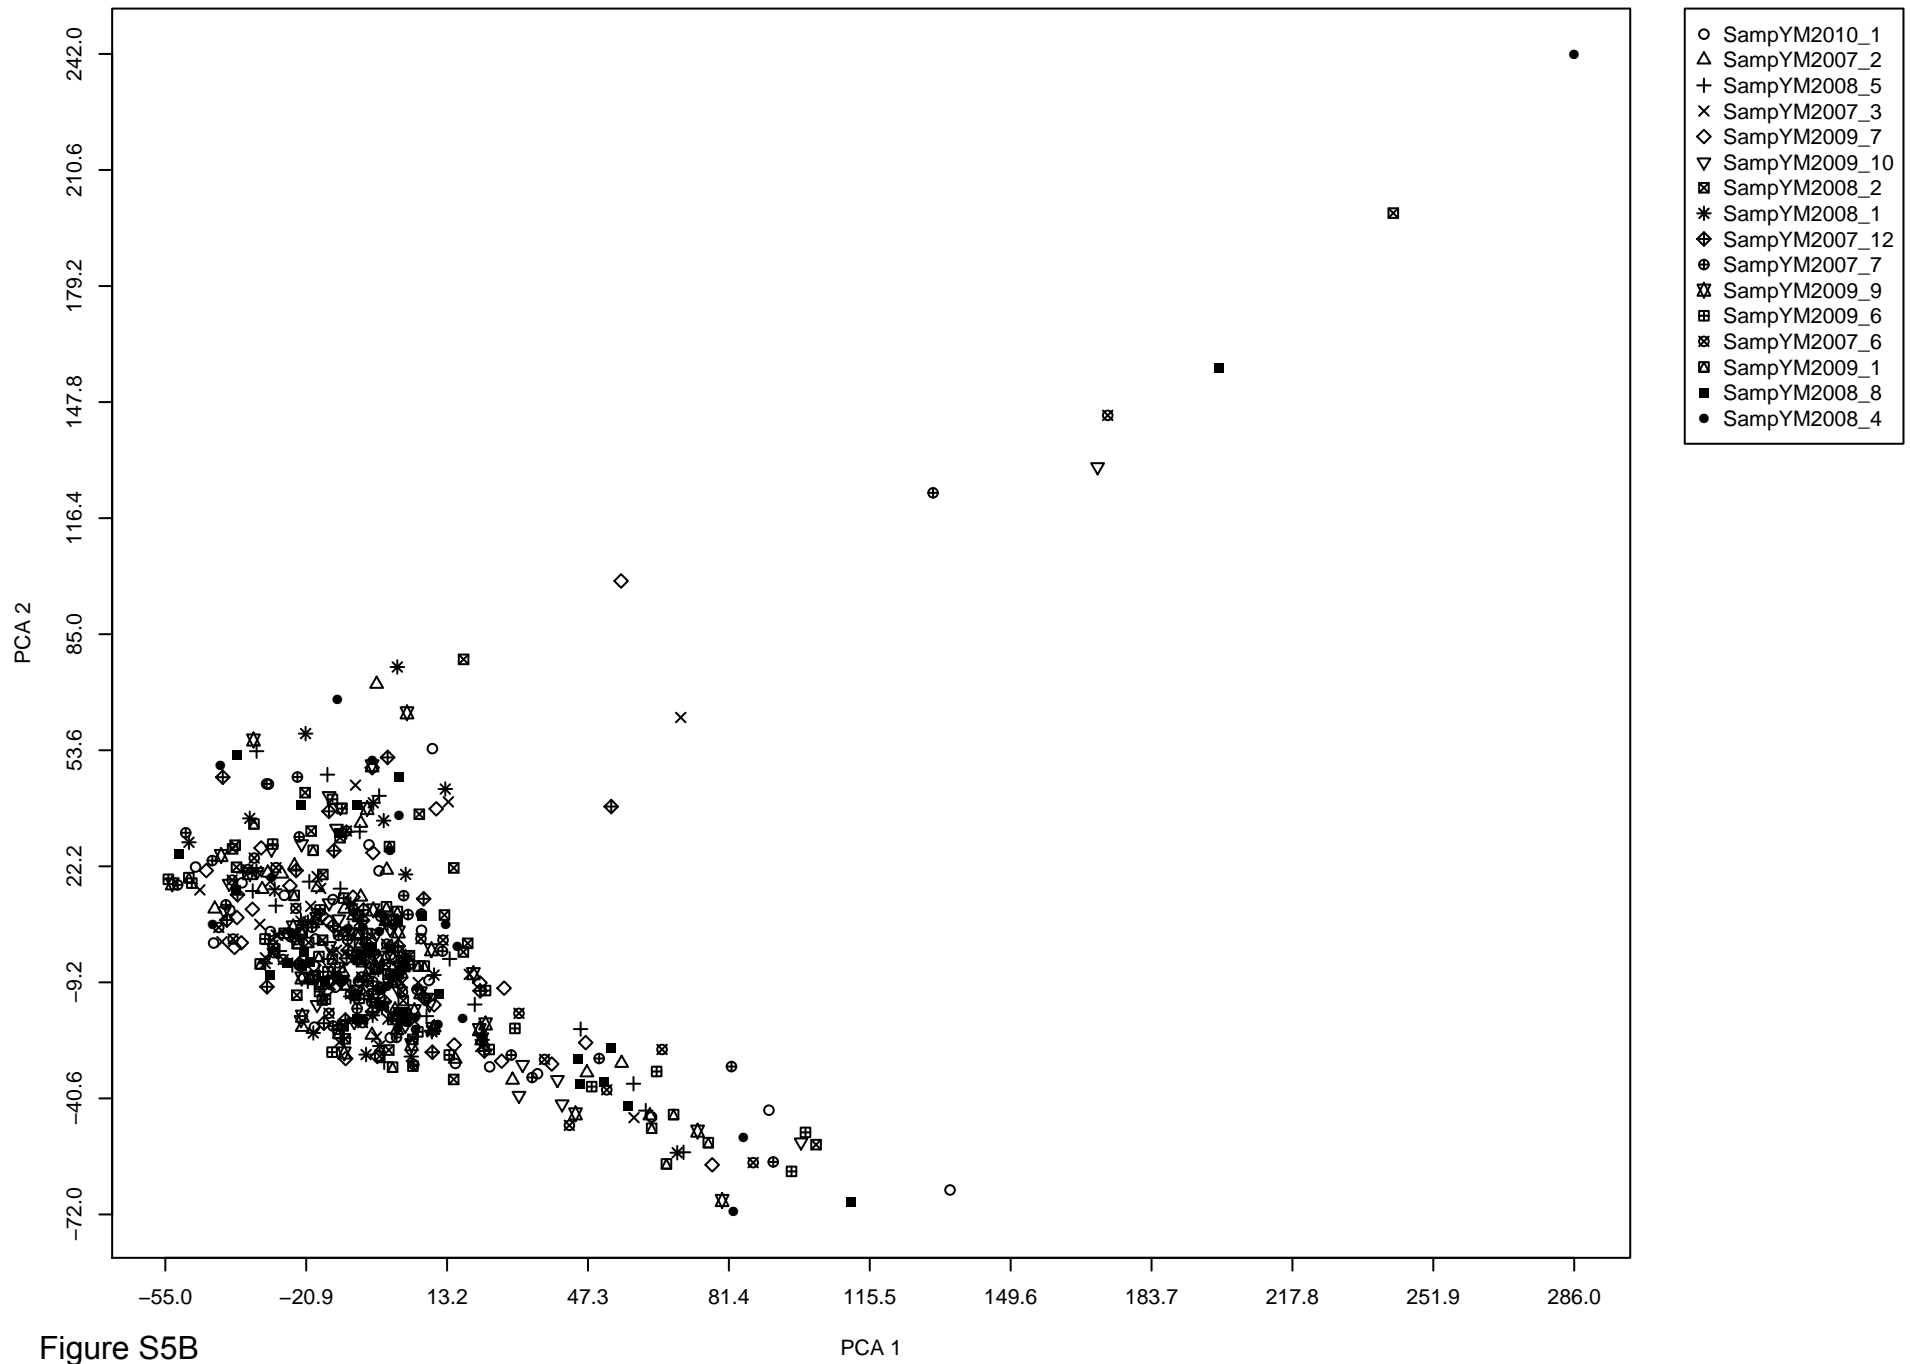



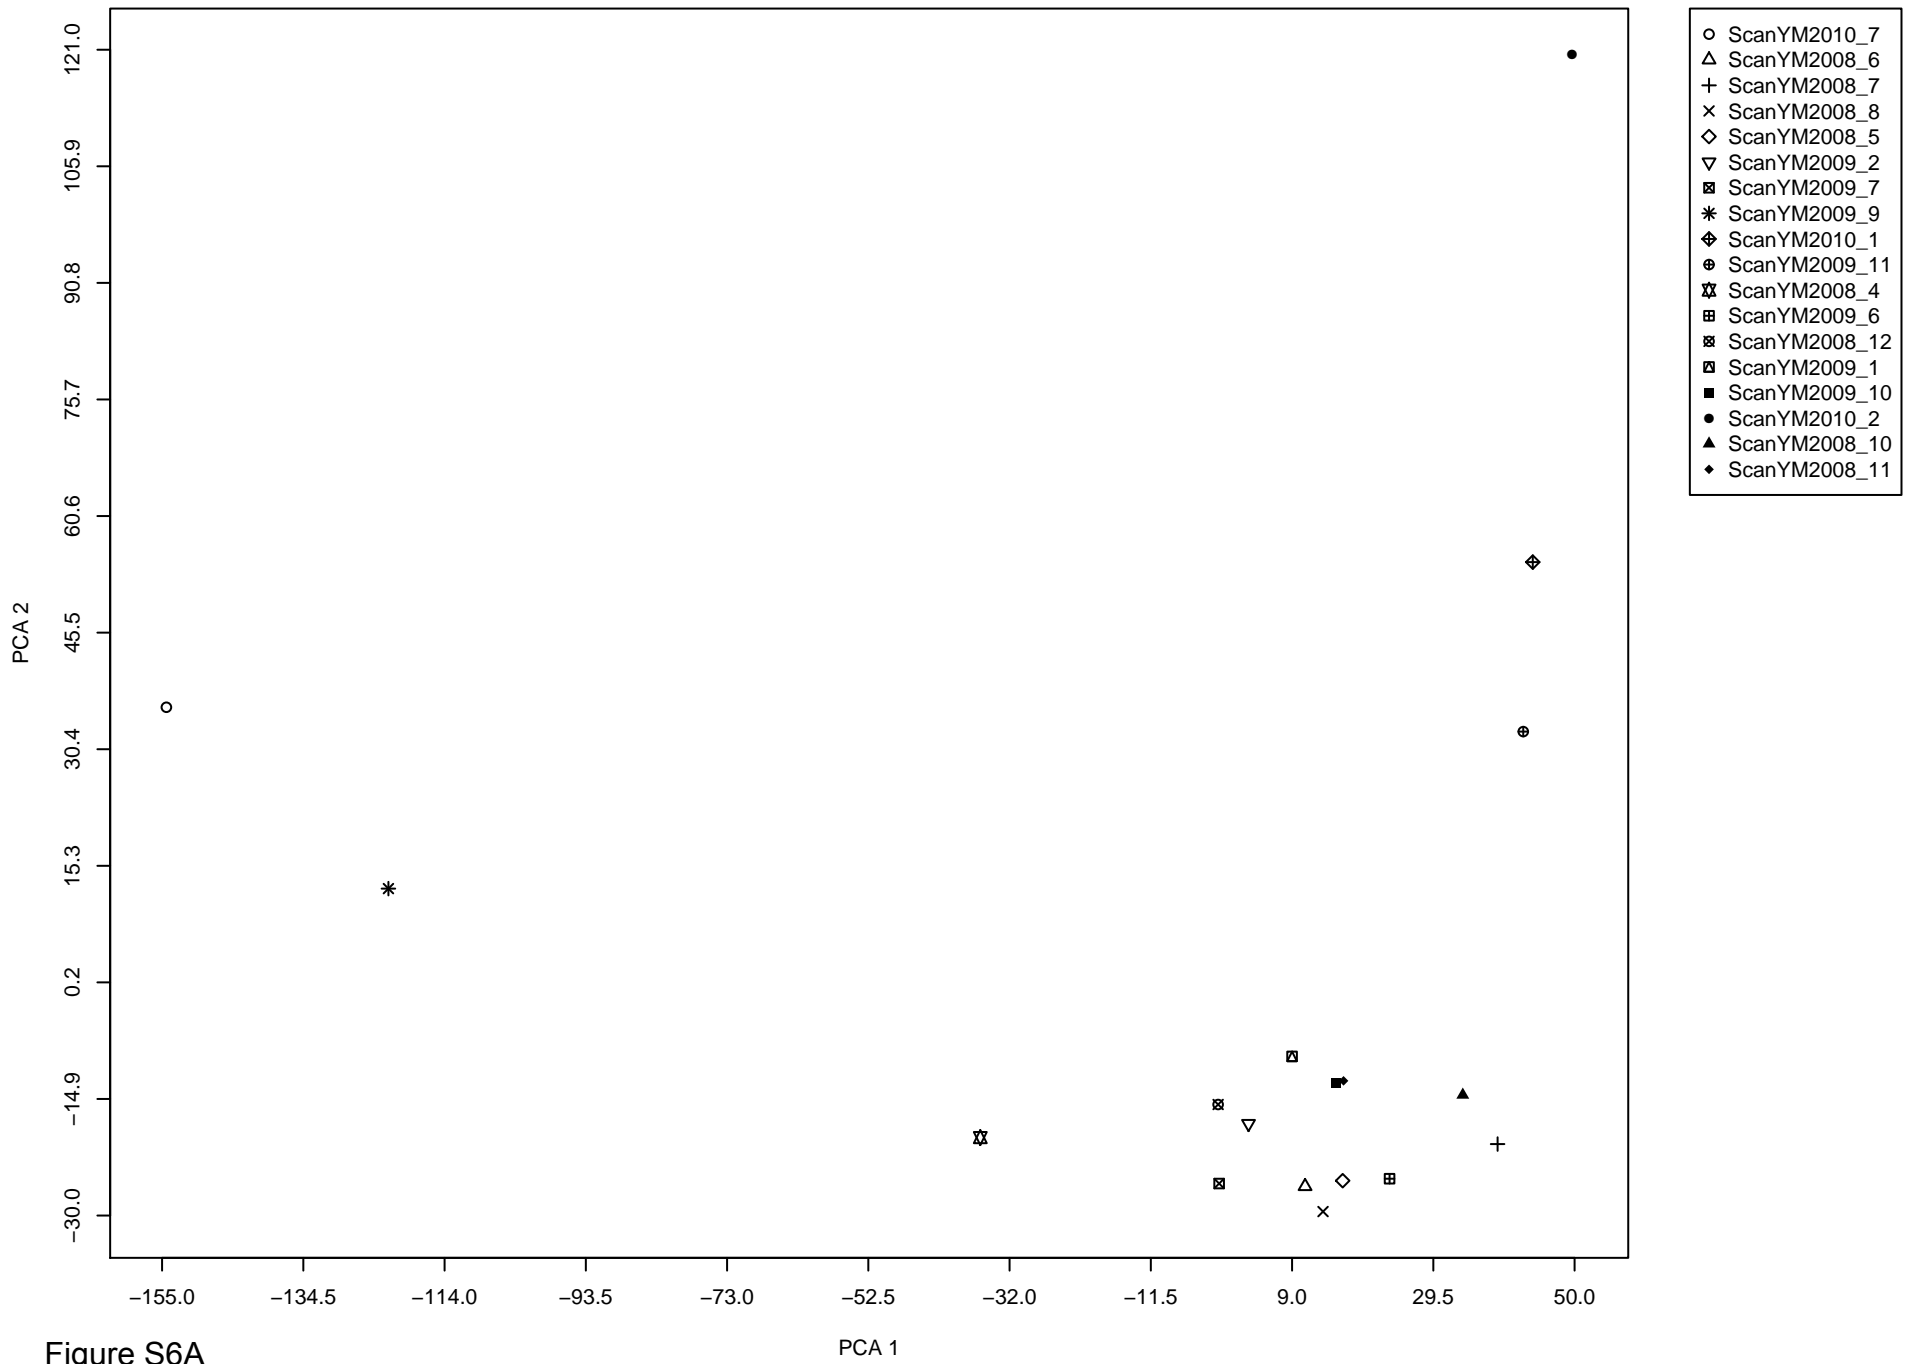

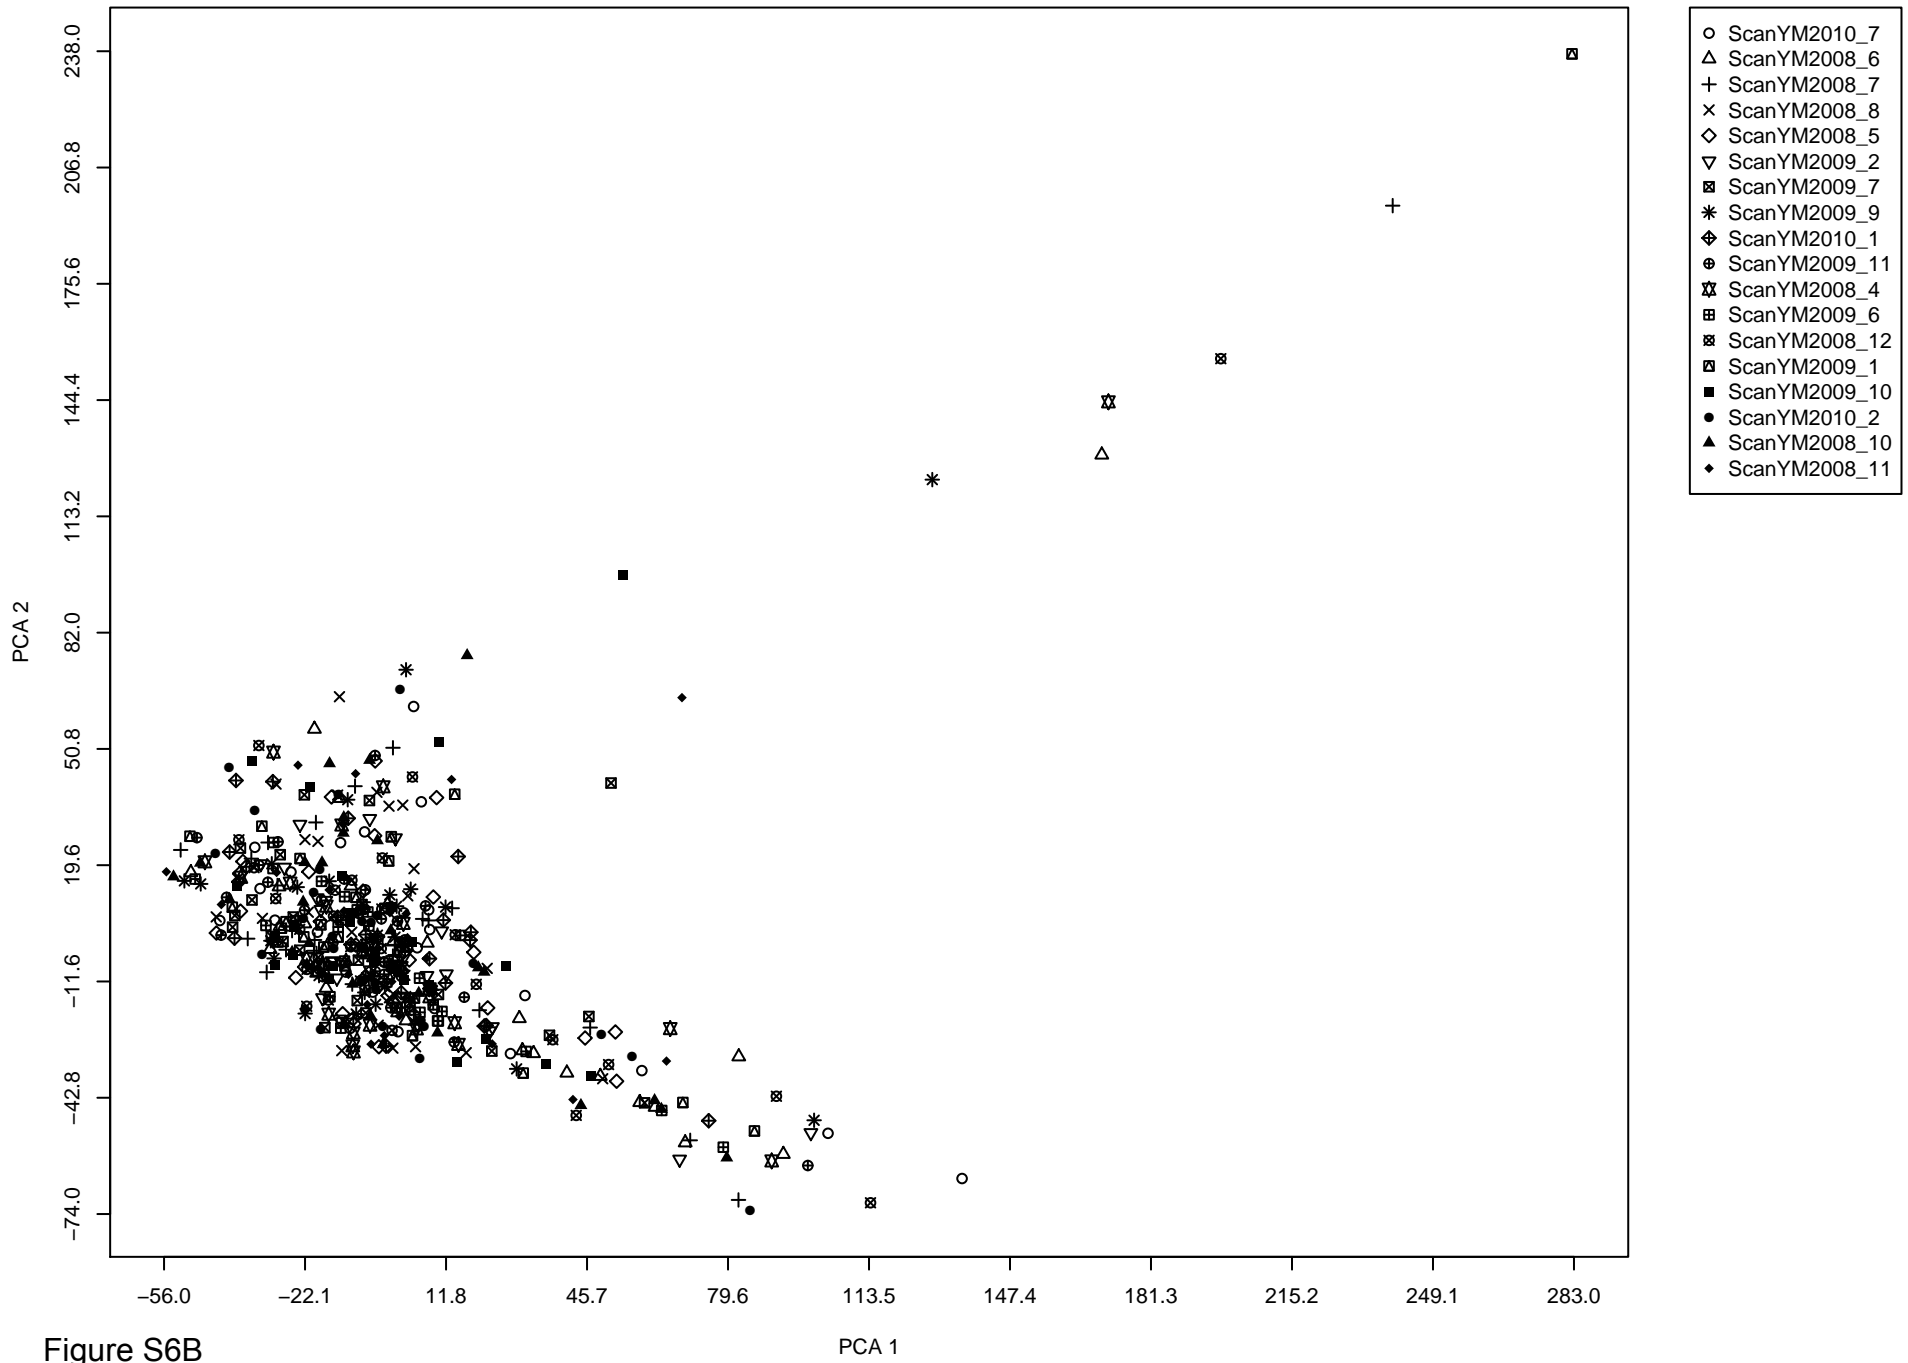

Supplement: pone.0114178.s008.pdf [file pone.0114178.s008.pdf]
