# Supplementary material for: Natural Variation in Fish Transcriptomes: Comparative Analysis of the Fathead Minnow (Pimephales promelas) and Zebrafish (Danio rerio)
Source: PubMed Central journal article supplement (PMC4262388; doi:10.1371/journal.pone.0114178), 2014-12-10
Supplement: pone.0114178.s010.pdf [file pone.0114178.s010.pdf]

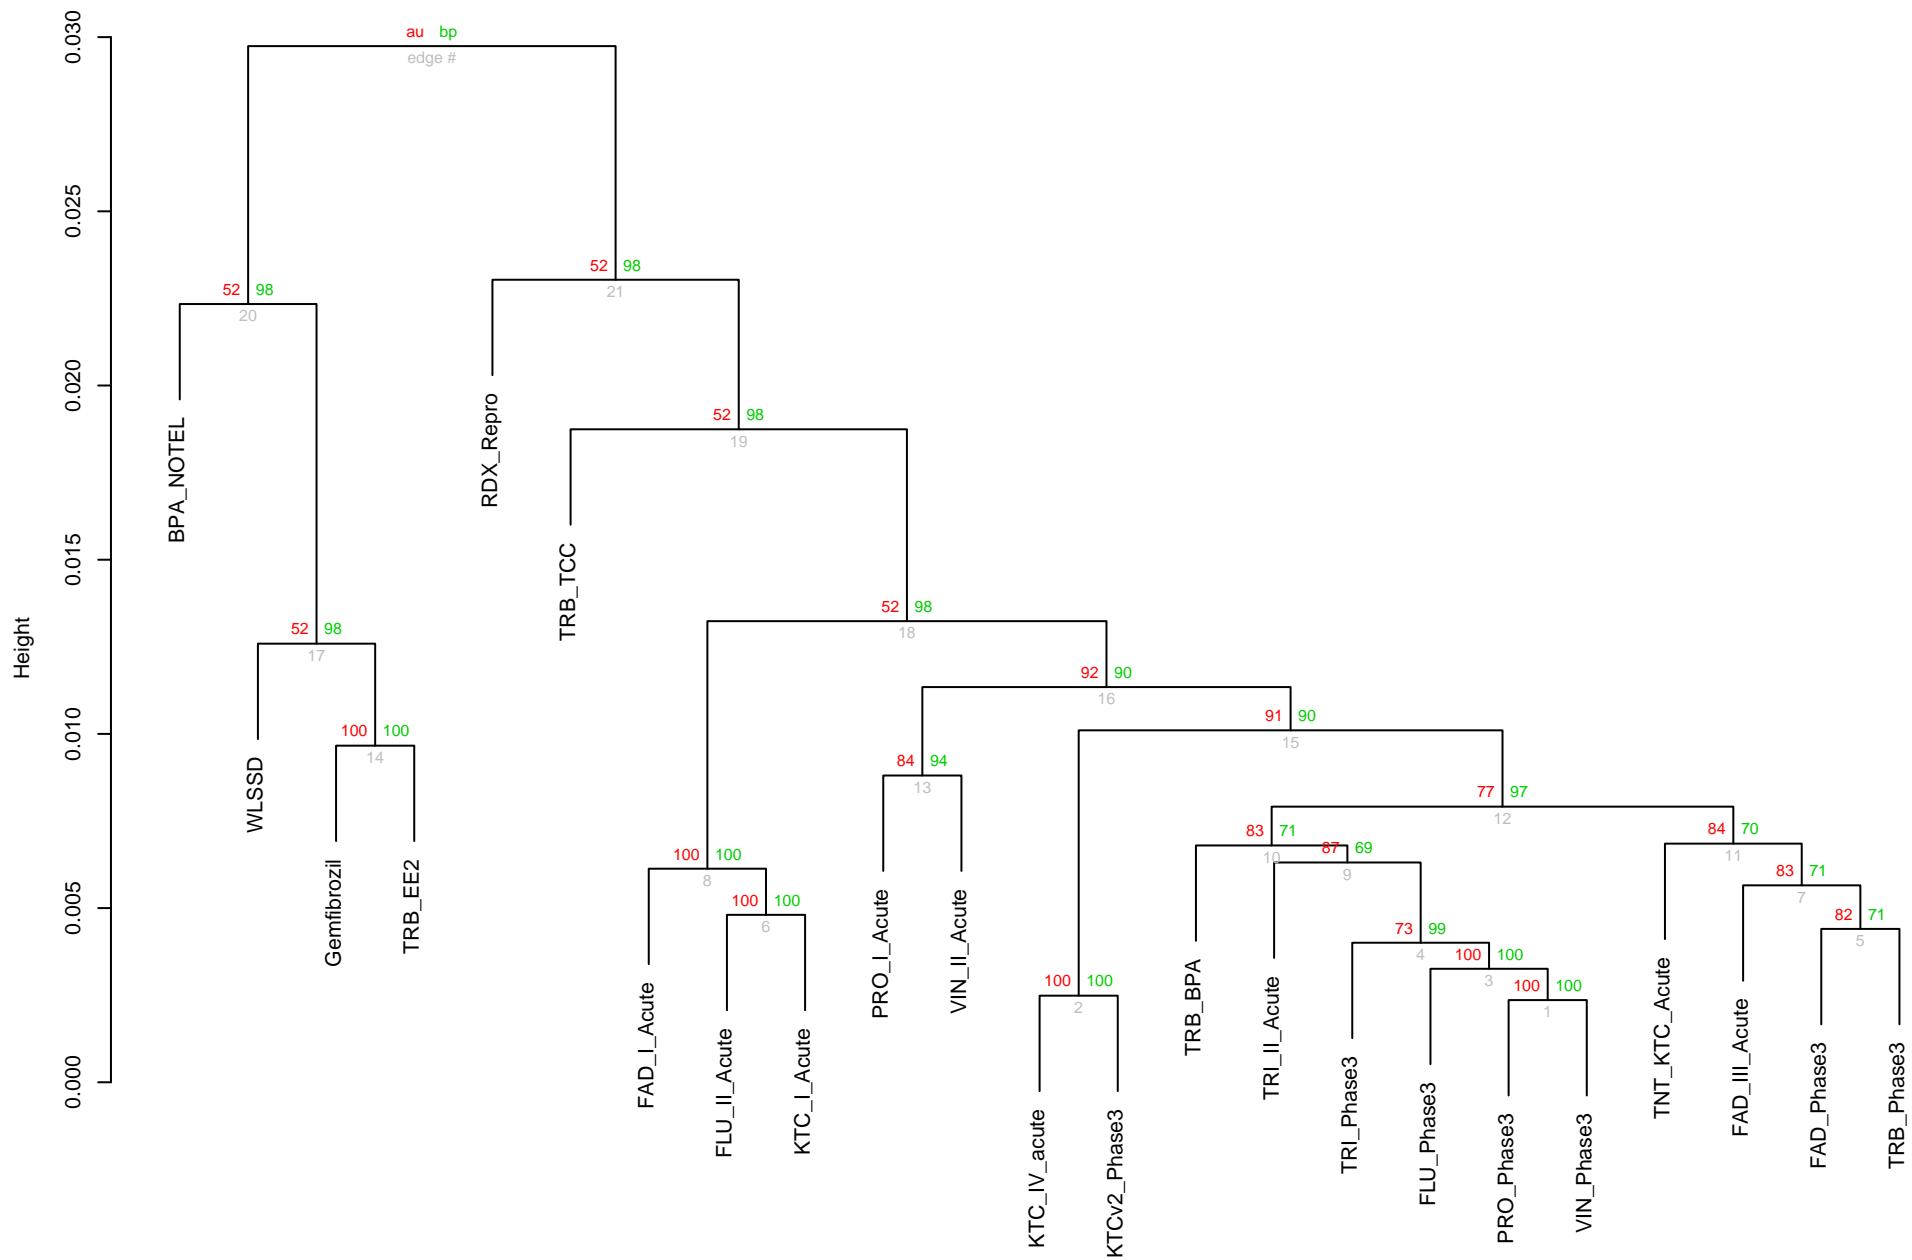

Figure S12A

Distance: correlation  
Cluster method: average



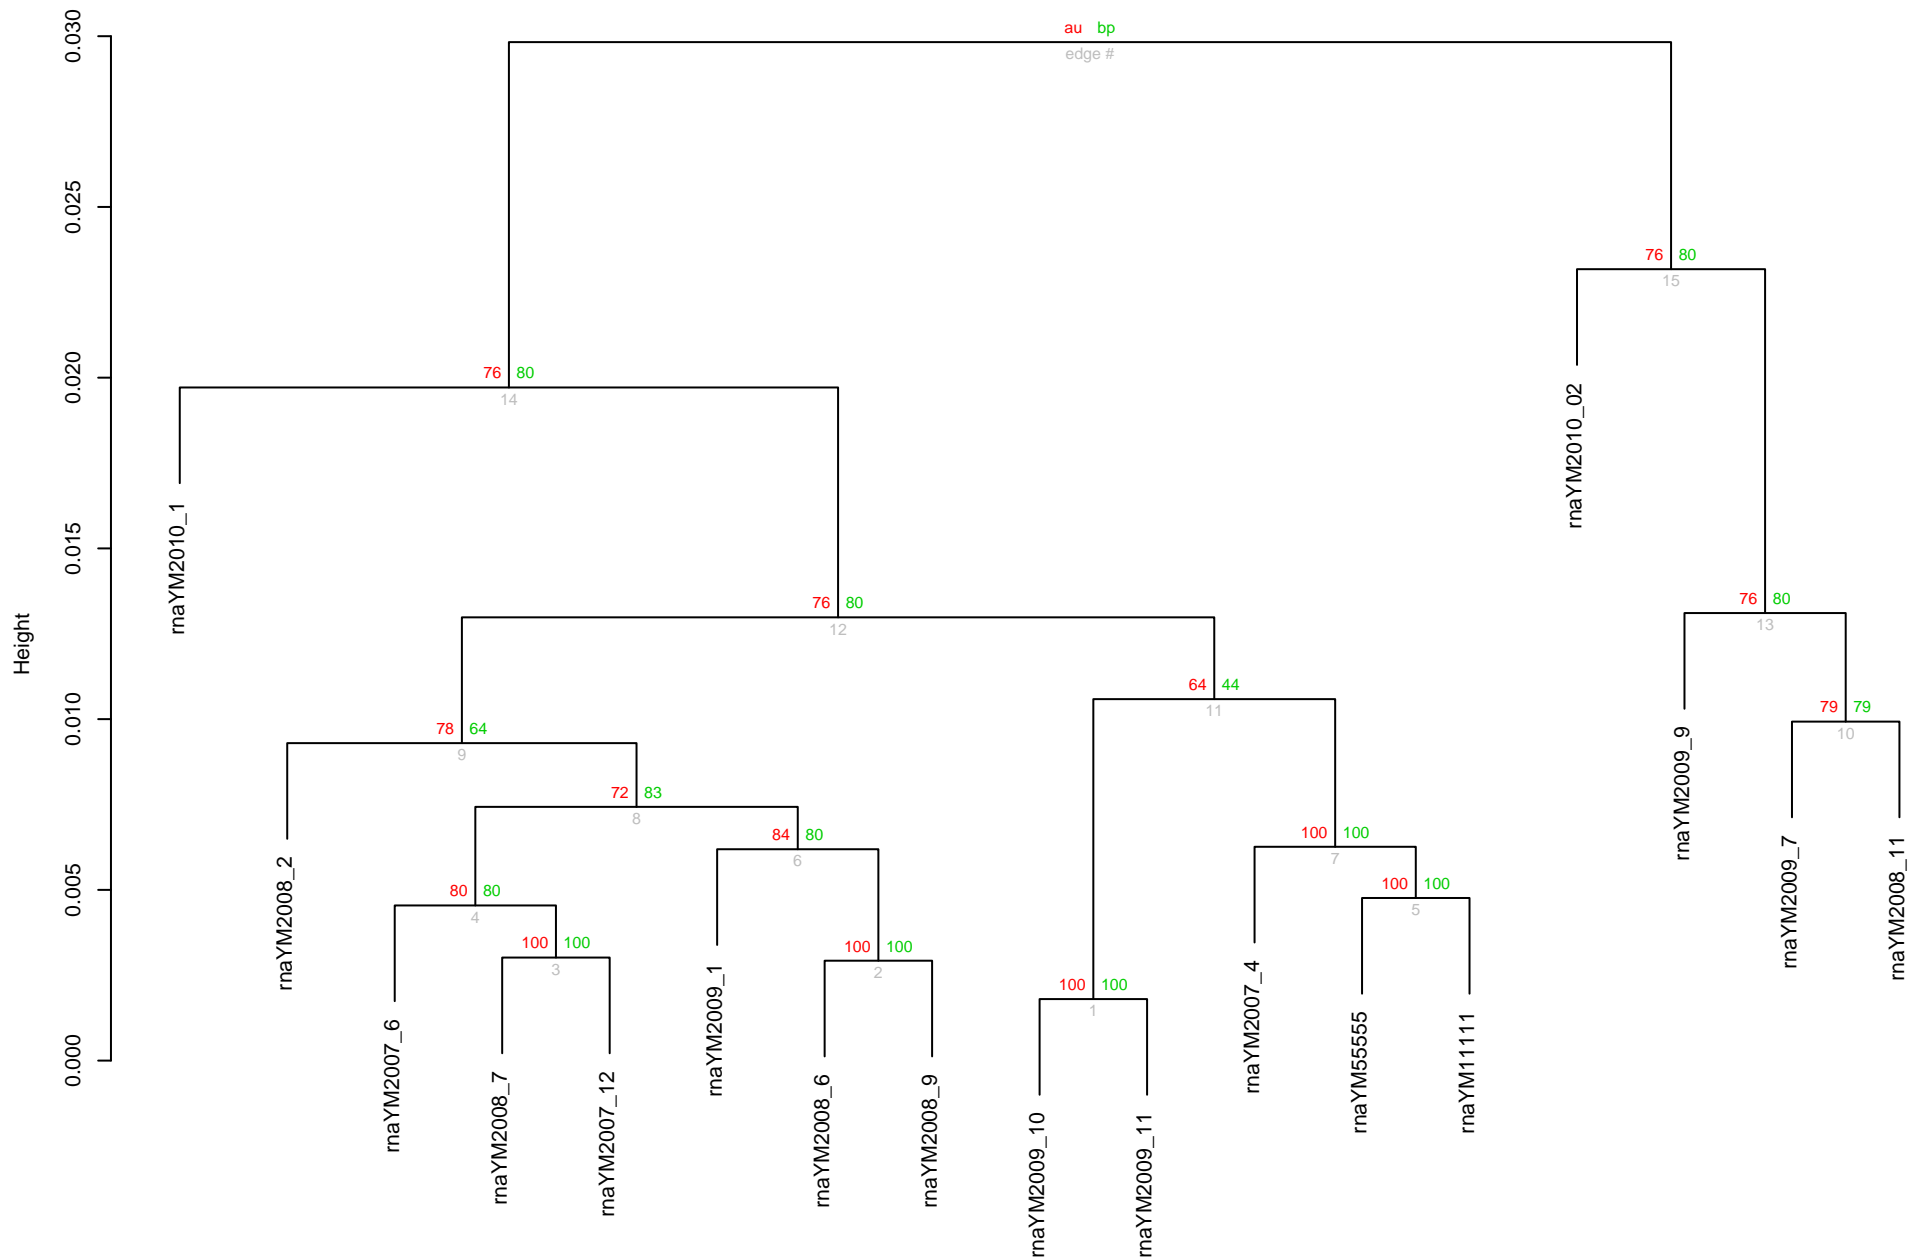

Figure S13A

Distance: correlation  
Cluster method: average



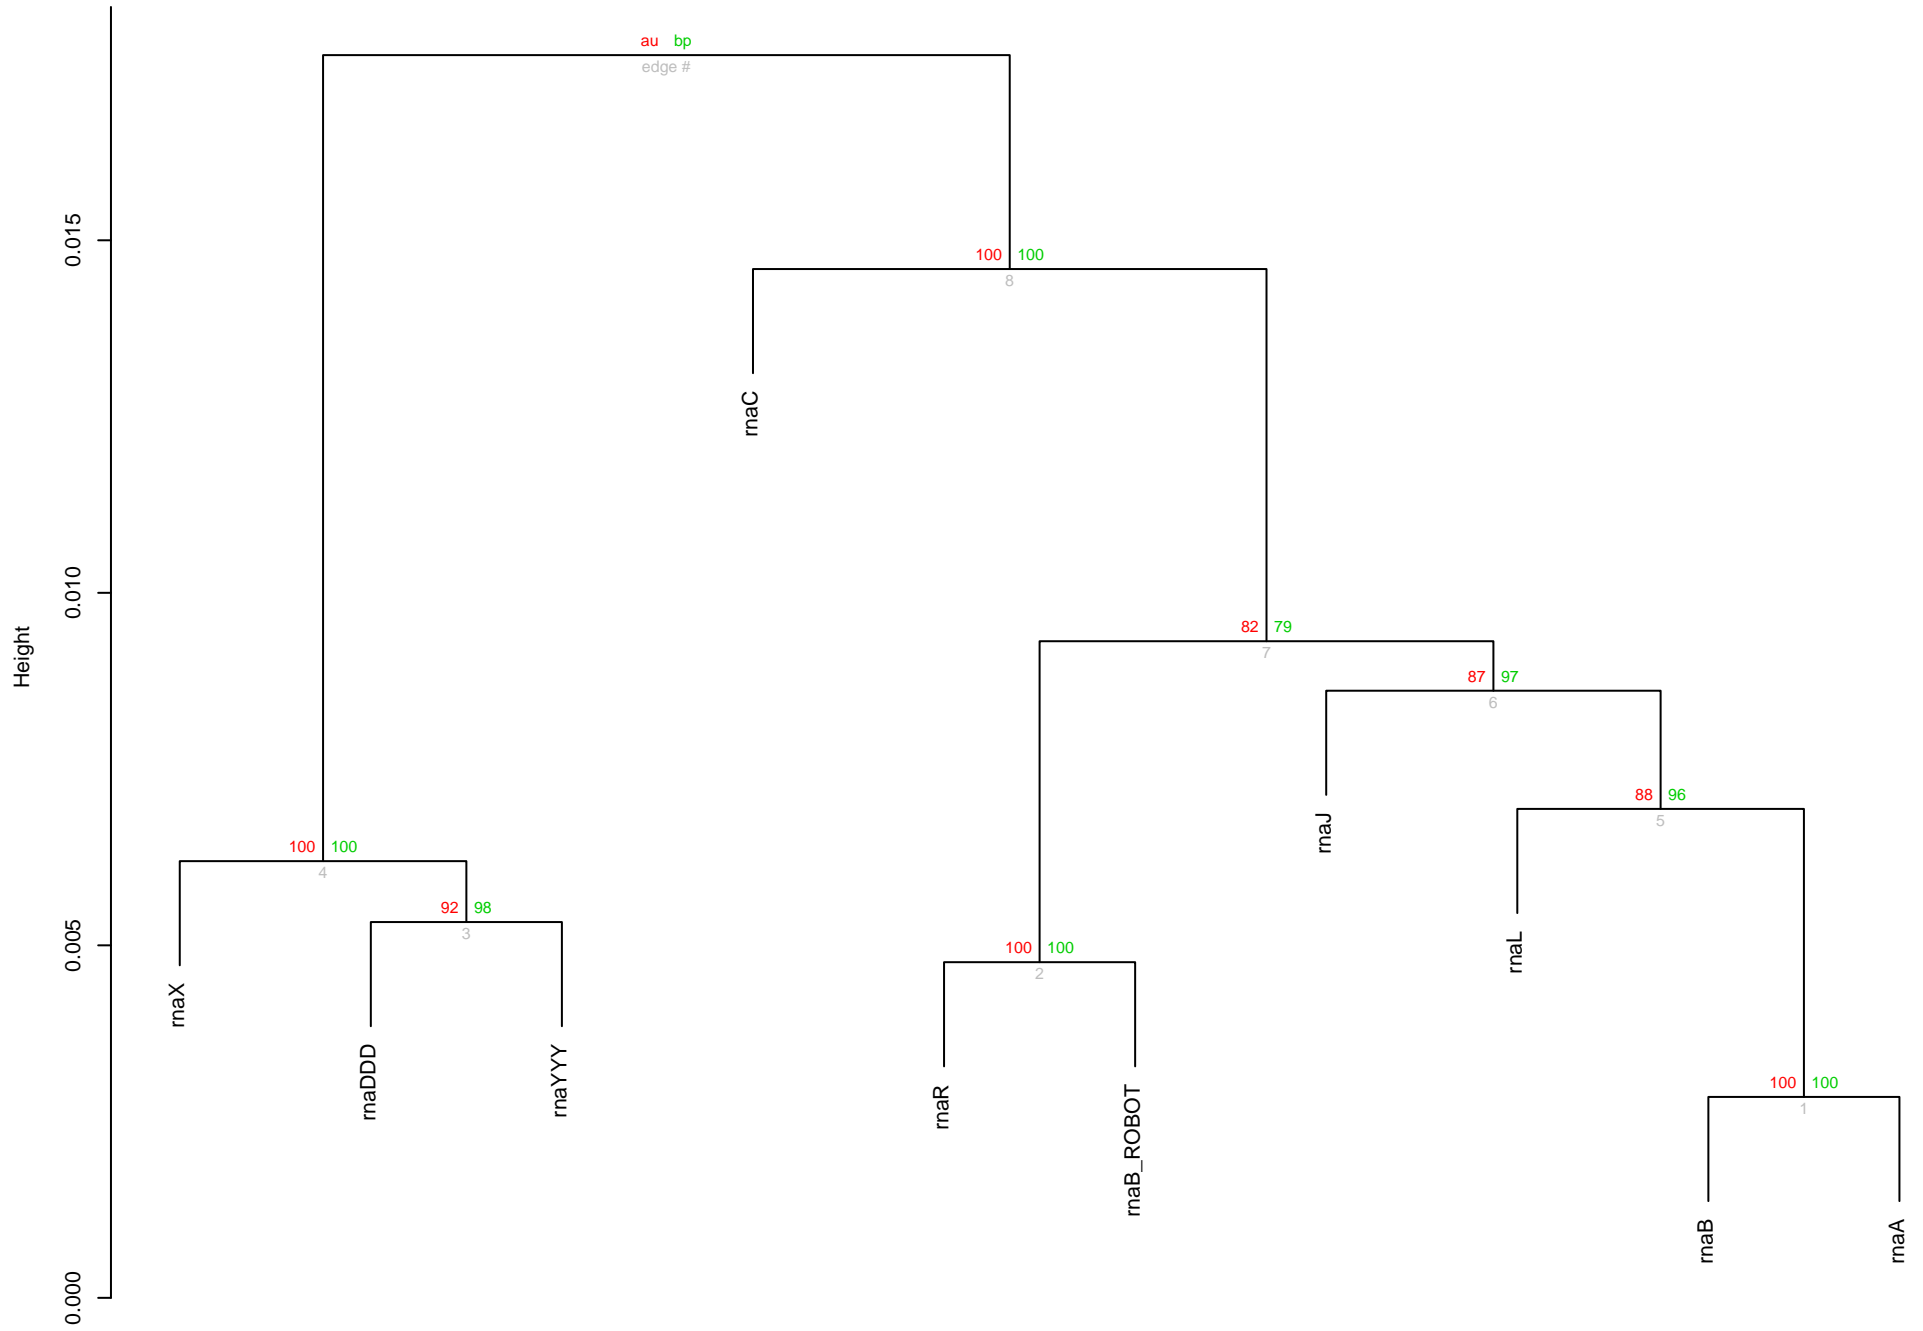

Figure S14A

Distance: correlation  
Cluster method: average



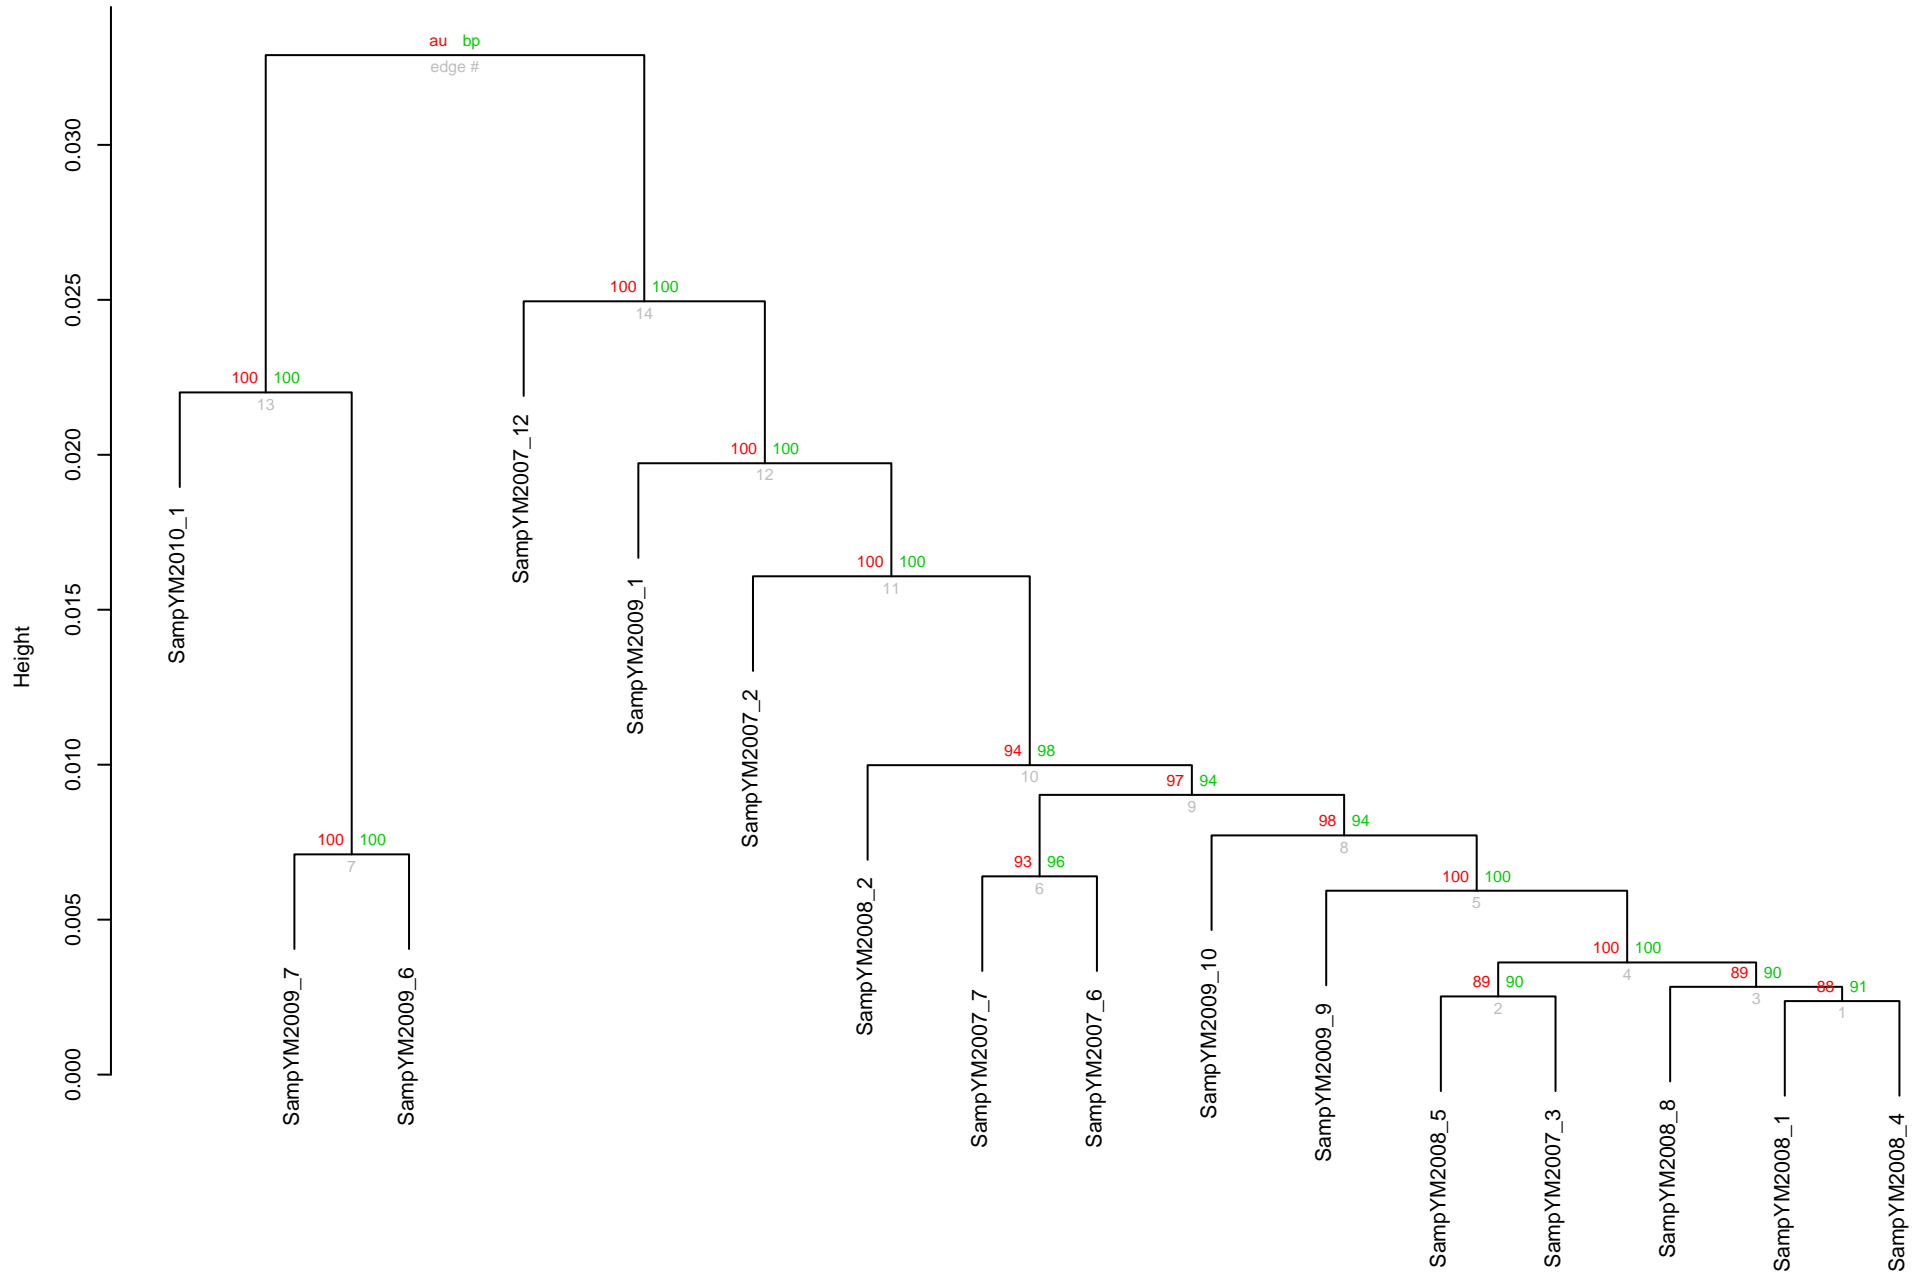

Figure S15A

Distance: correlation  
Cluster method: average





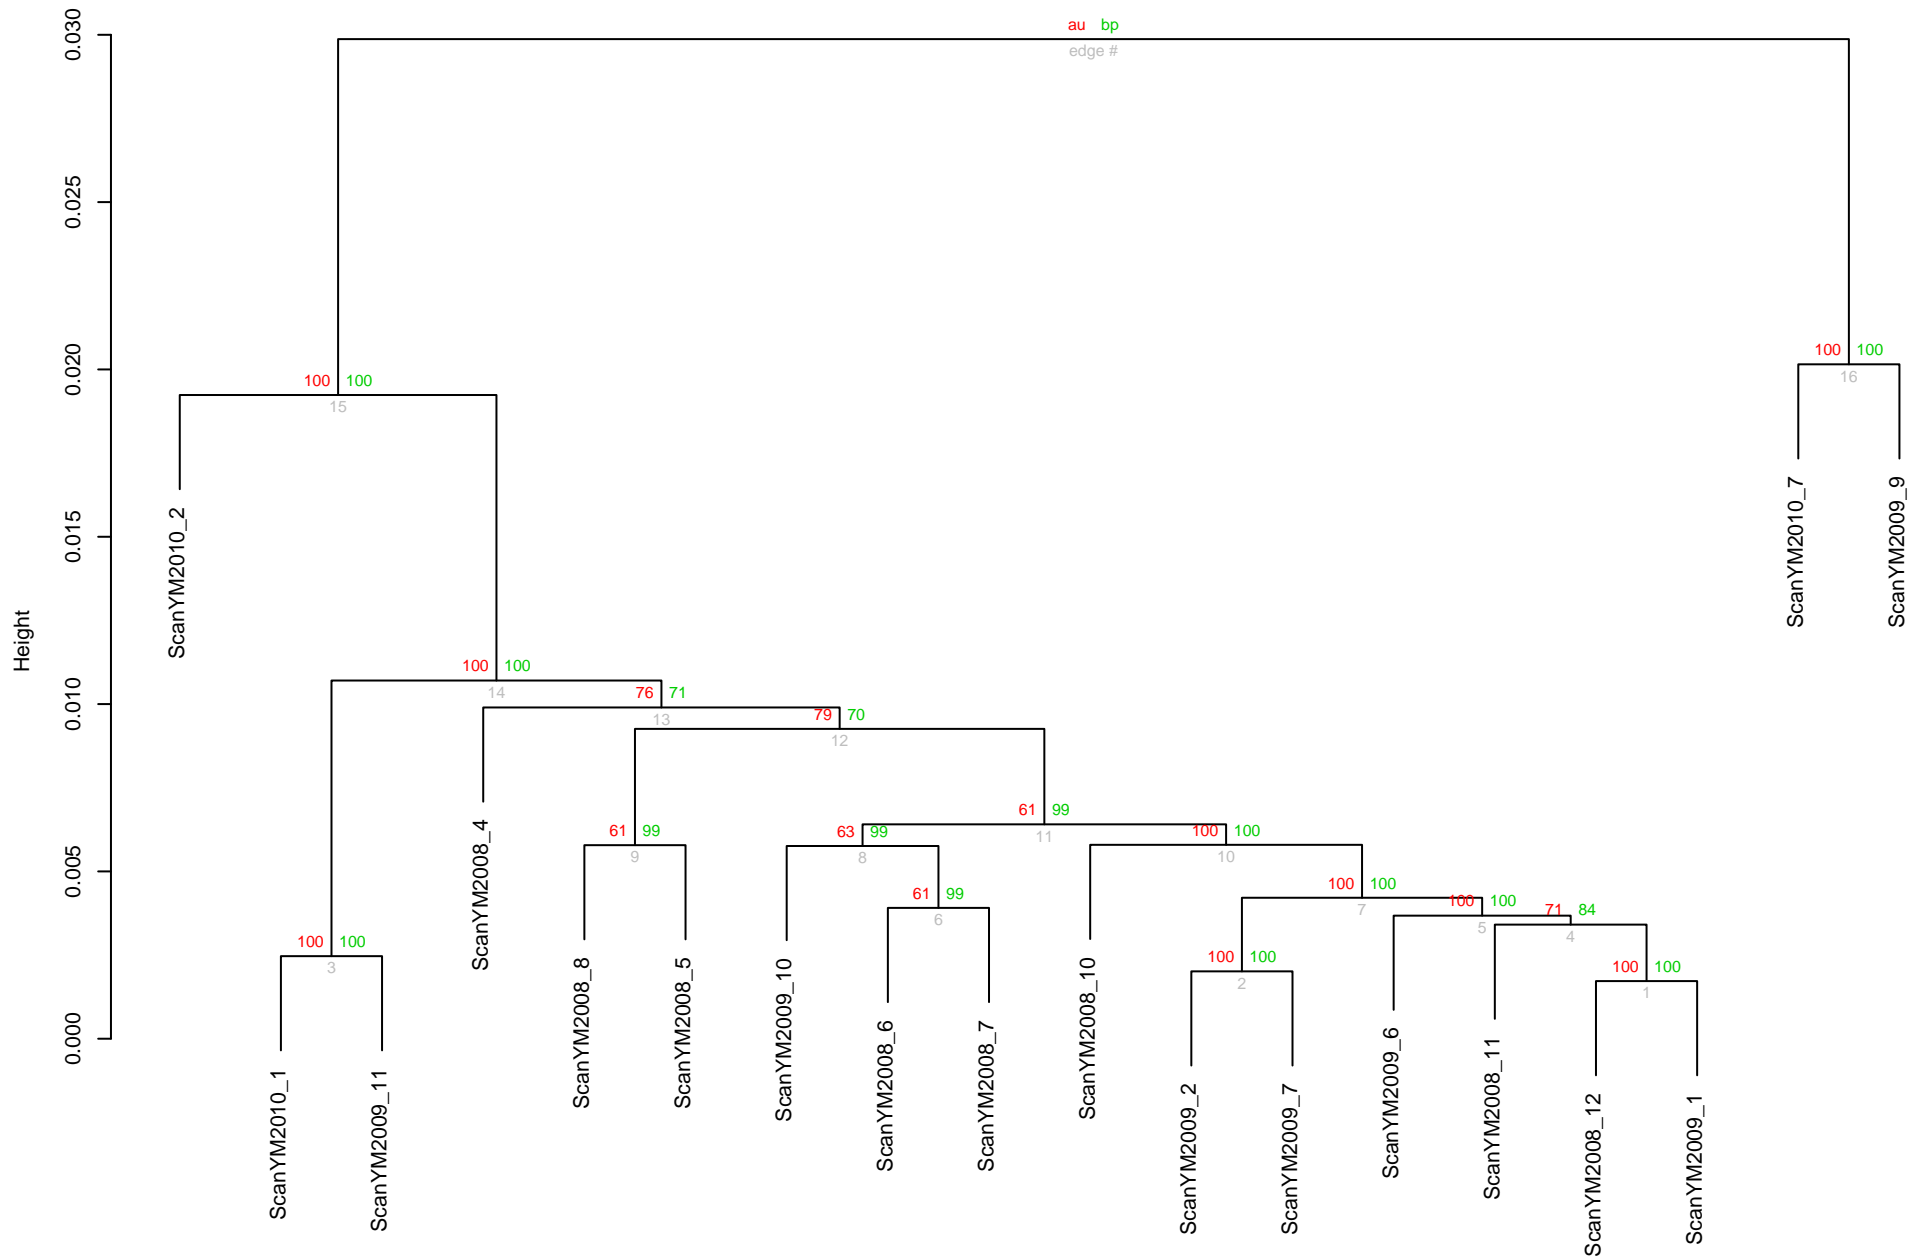

Figure S16A

Distance: correlation  
Cluster method: average

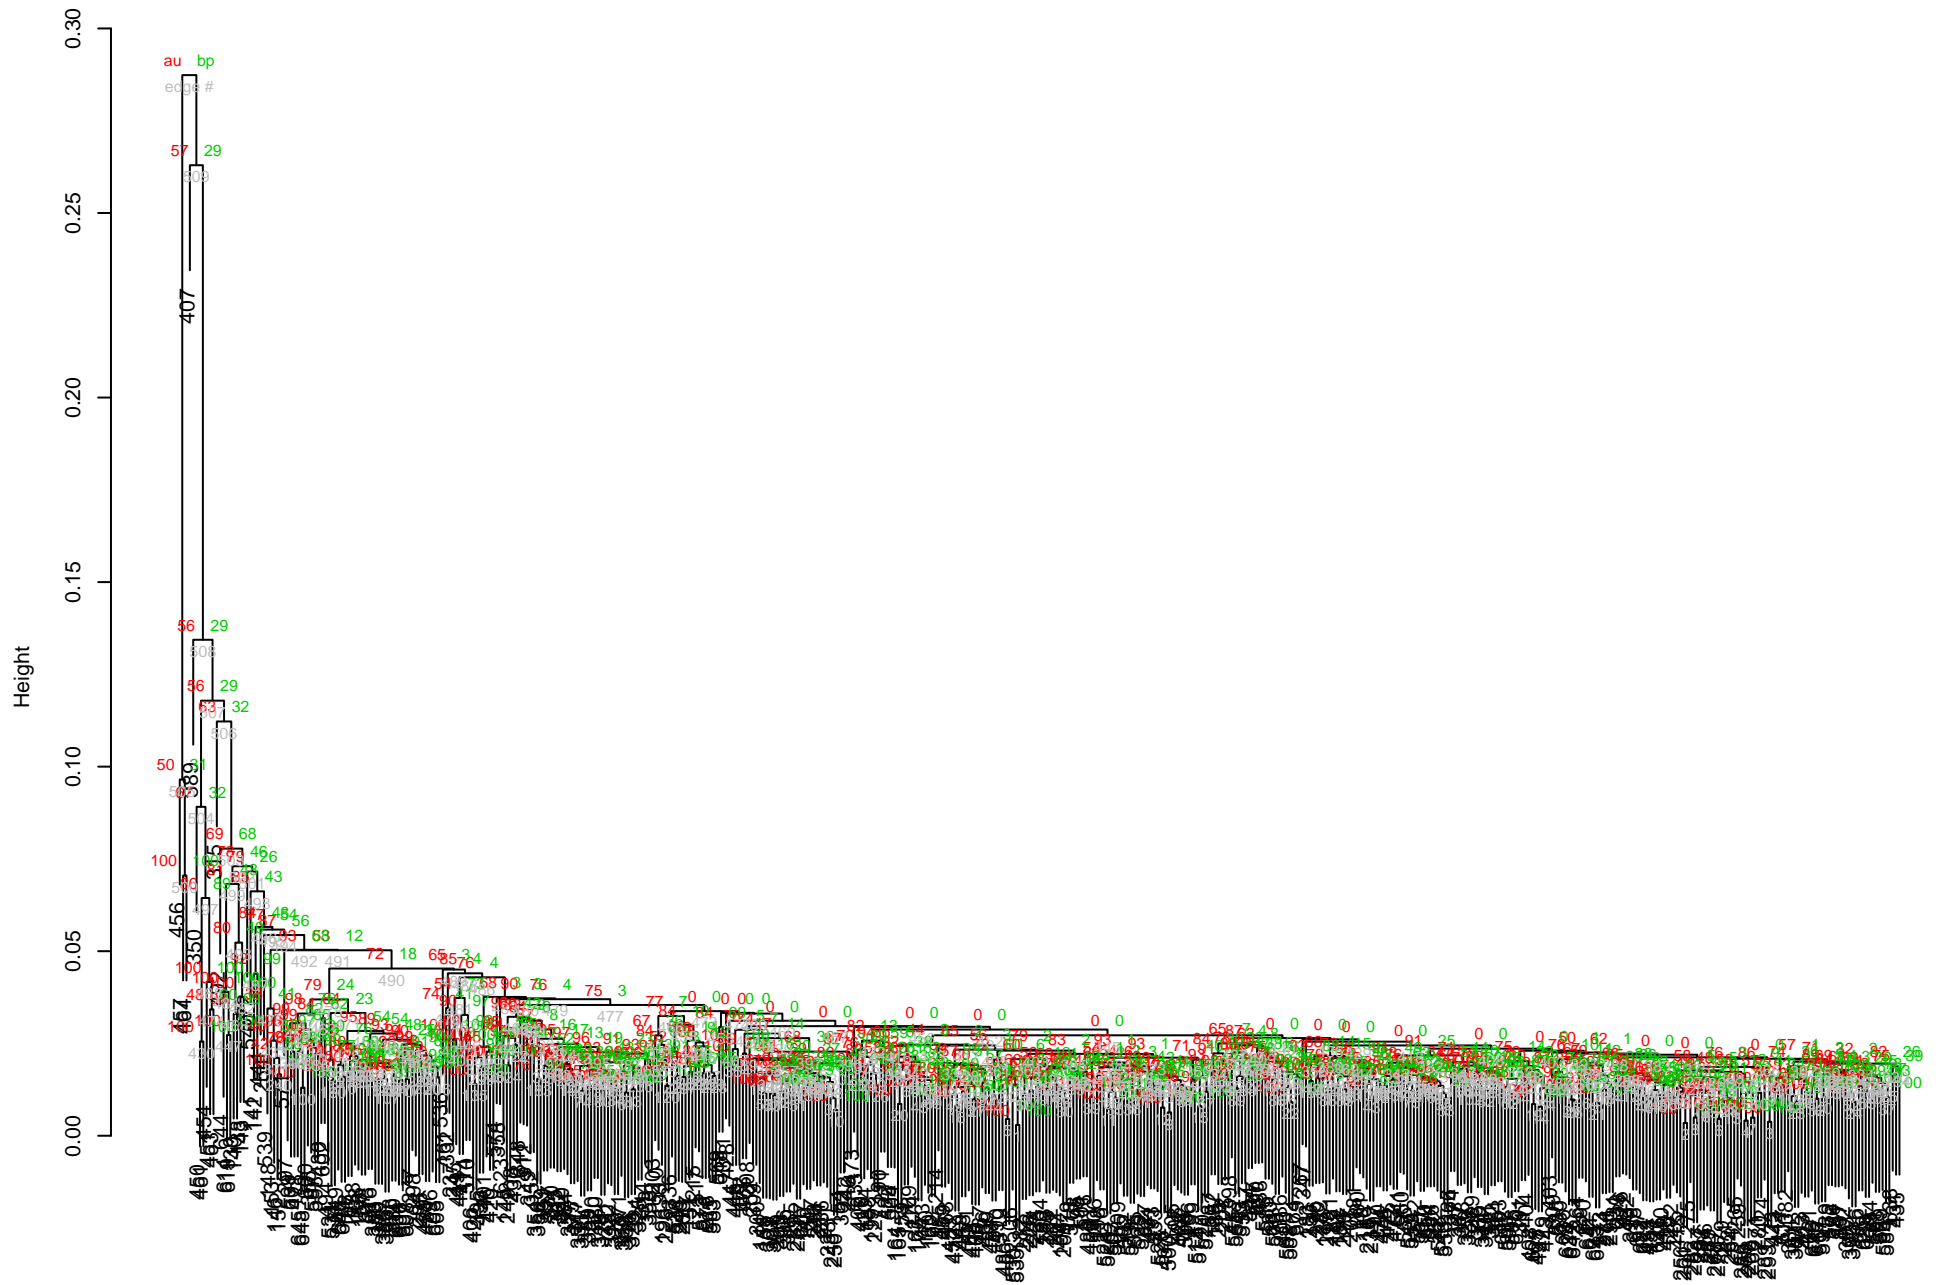

Figure S16B

Distance: correlation  
Cluster method: average
