# Supplementary material for: Natural Variation in Fish Transcriptomes: Comparative Analysis of the Fathead Minnow (Pimephales promelas) and Zebrafish (Danio rerio)
Source: PubMed Central journal article supplement (PMC4262388; doi:10.1371/journal.pone.0114178), 2014-12-10
Supplement: pone.0114178.s011.pdf [file pone.0114178.s011.pdf]

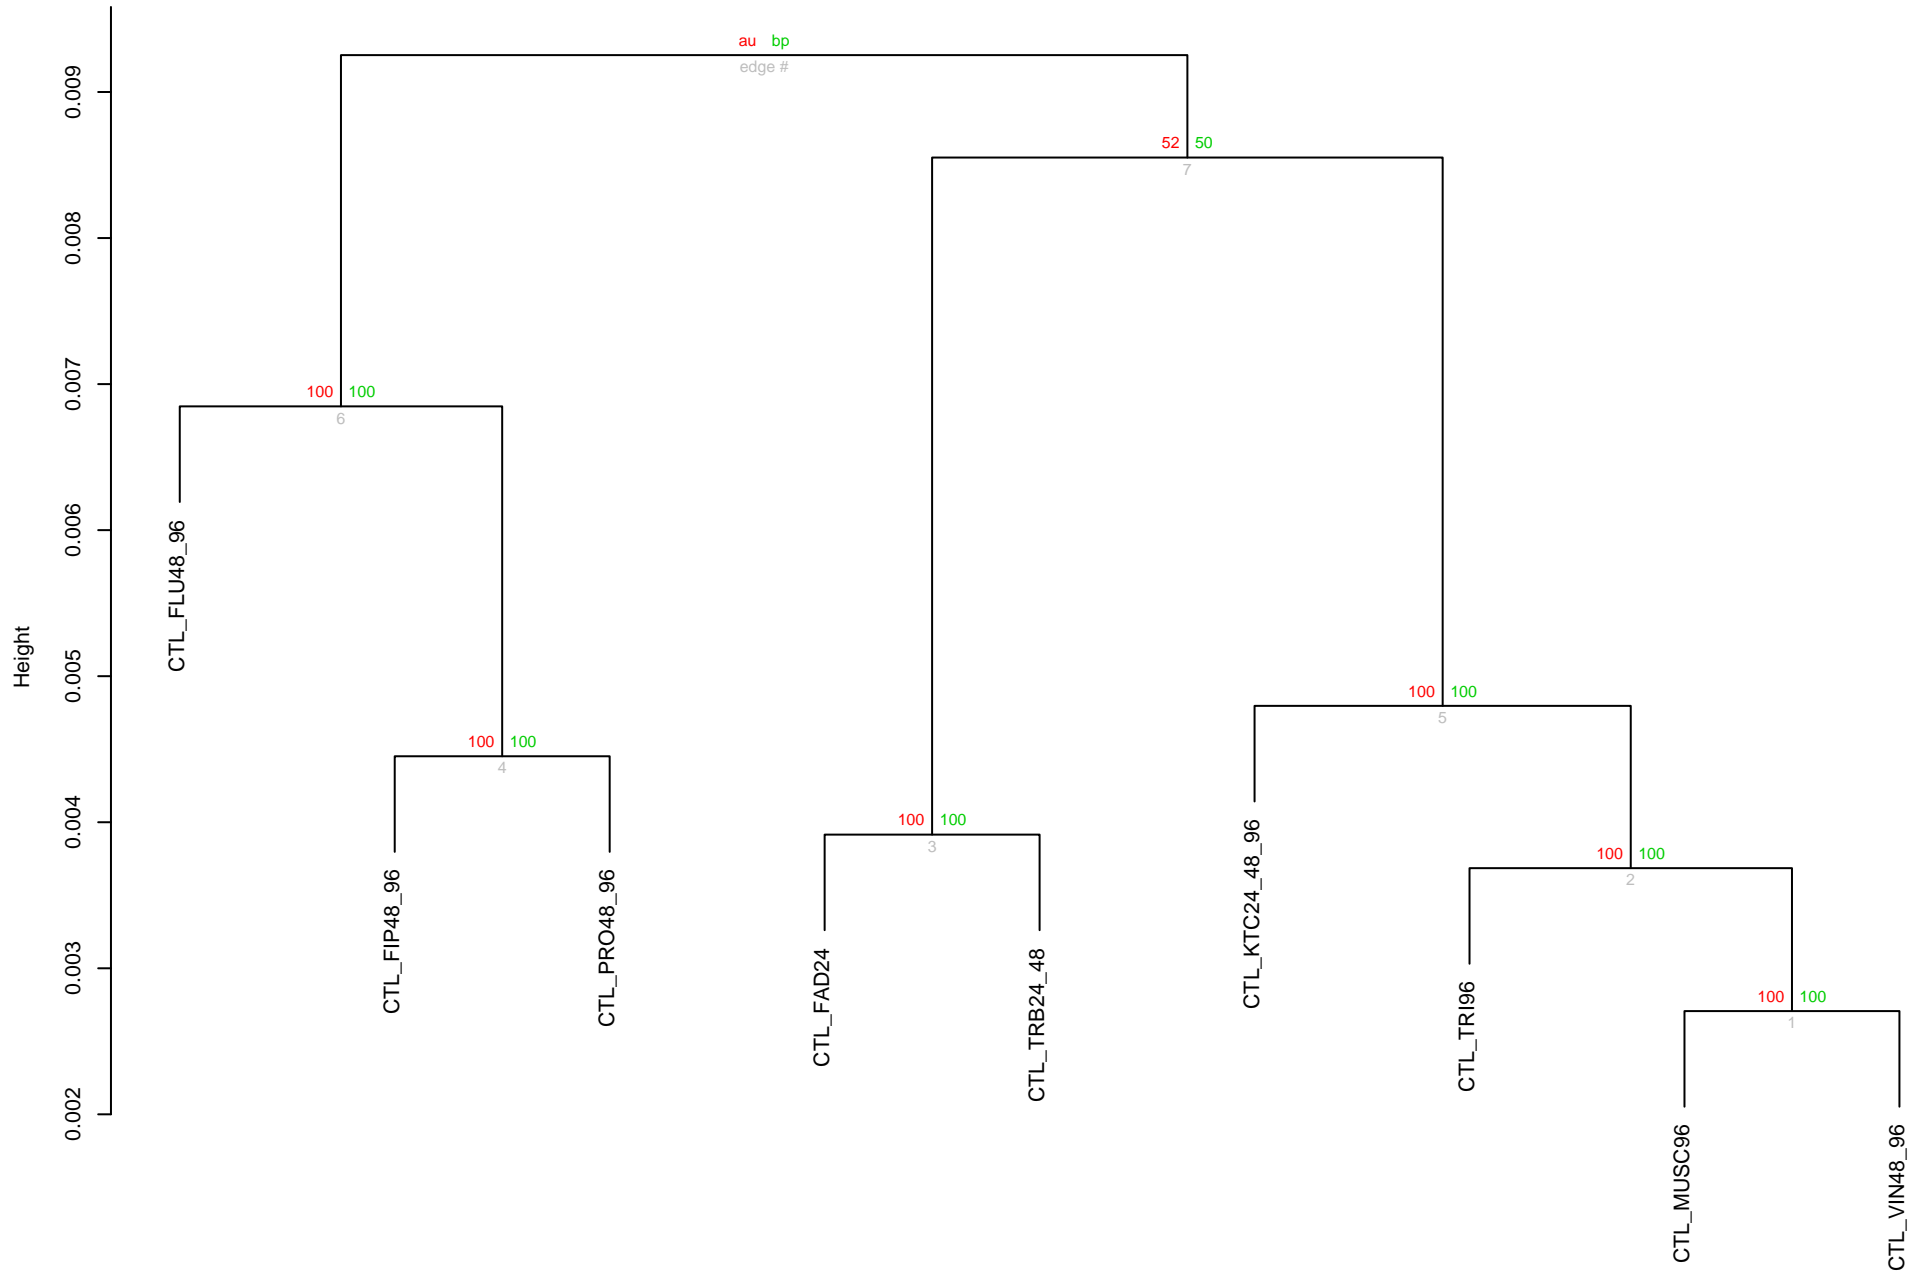

Figure S17A

Distance: correlation  
 Cluster method: average

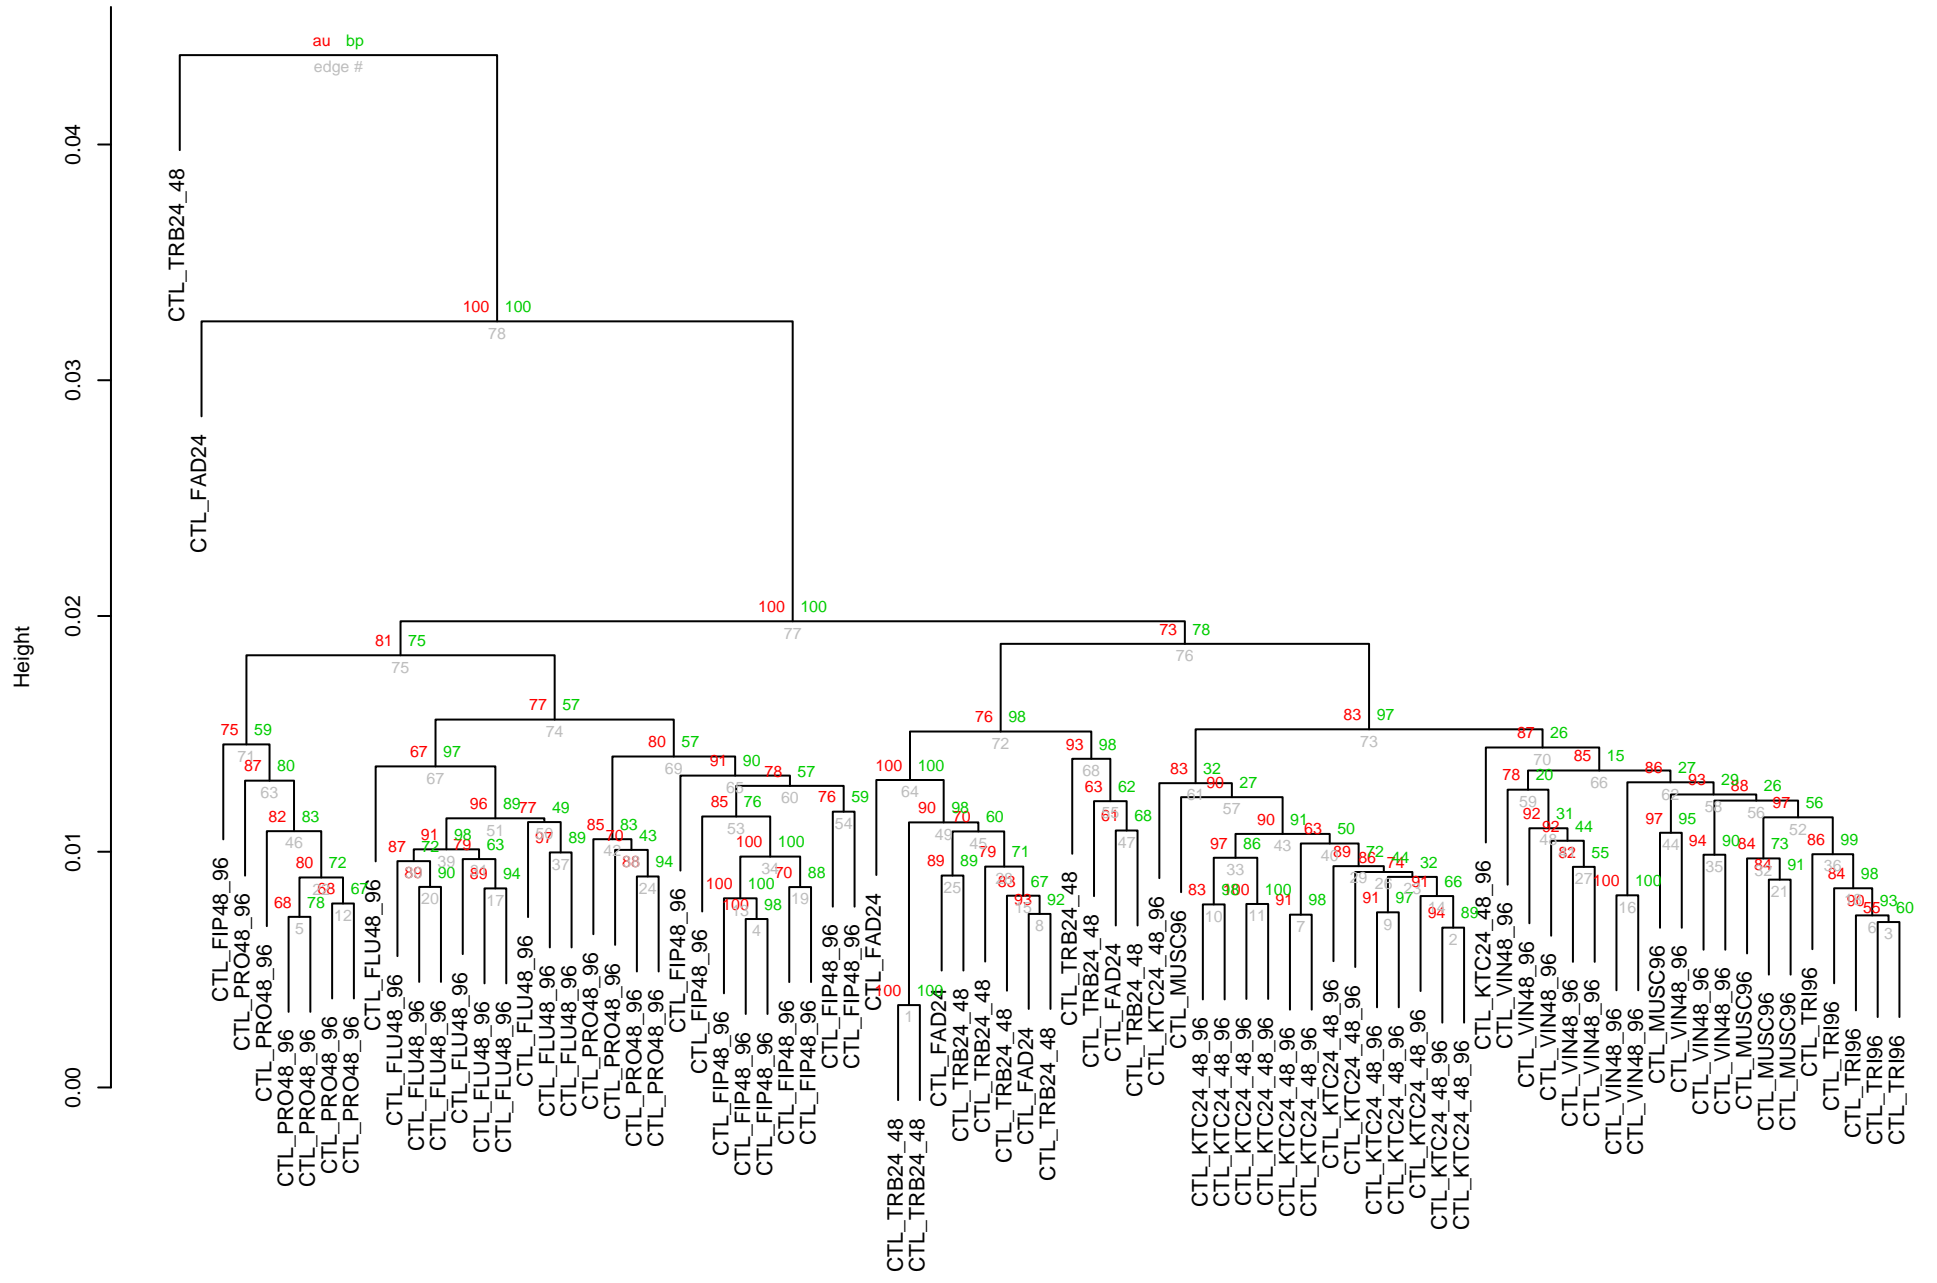

Figure S17B

Distance: correlation  
Cluster method: average

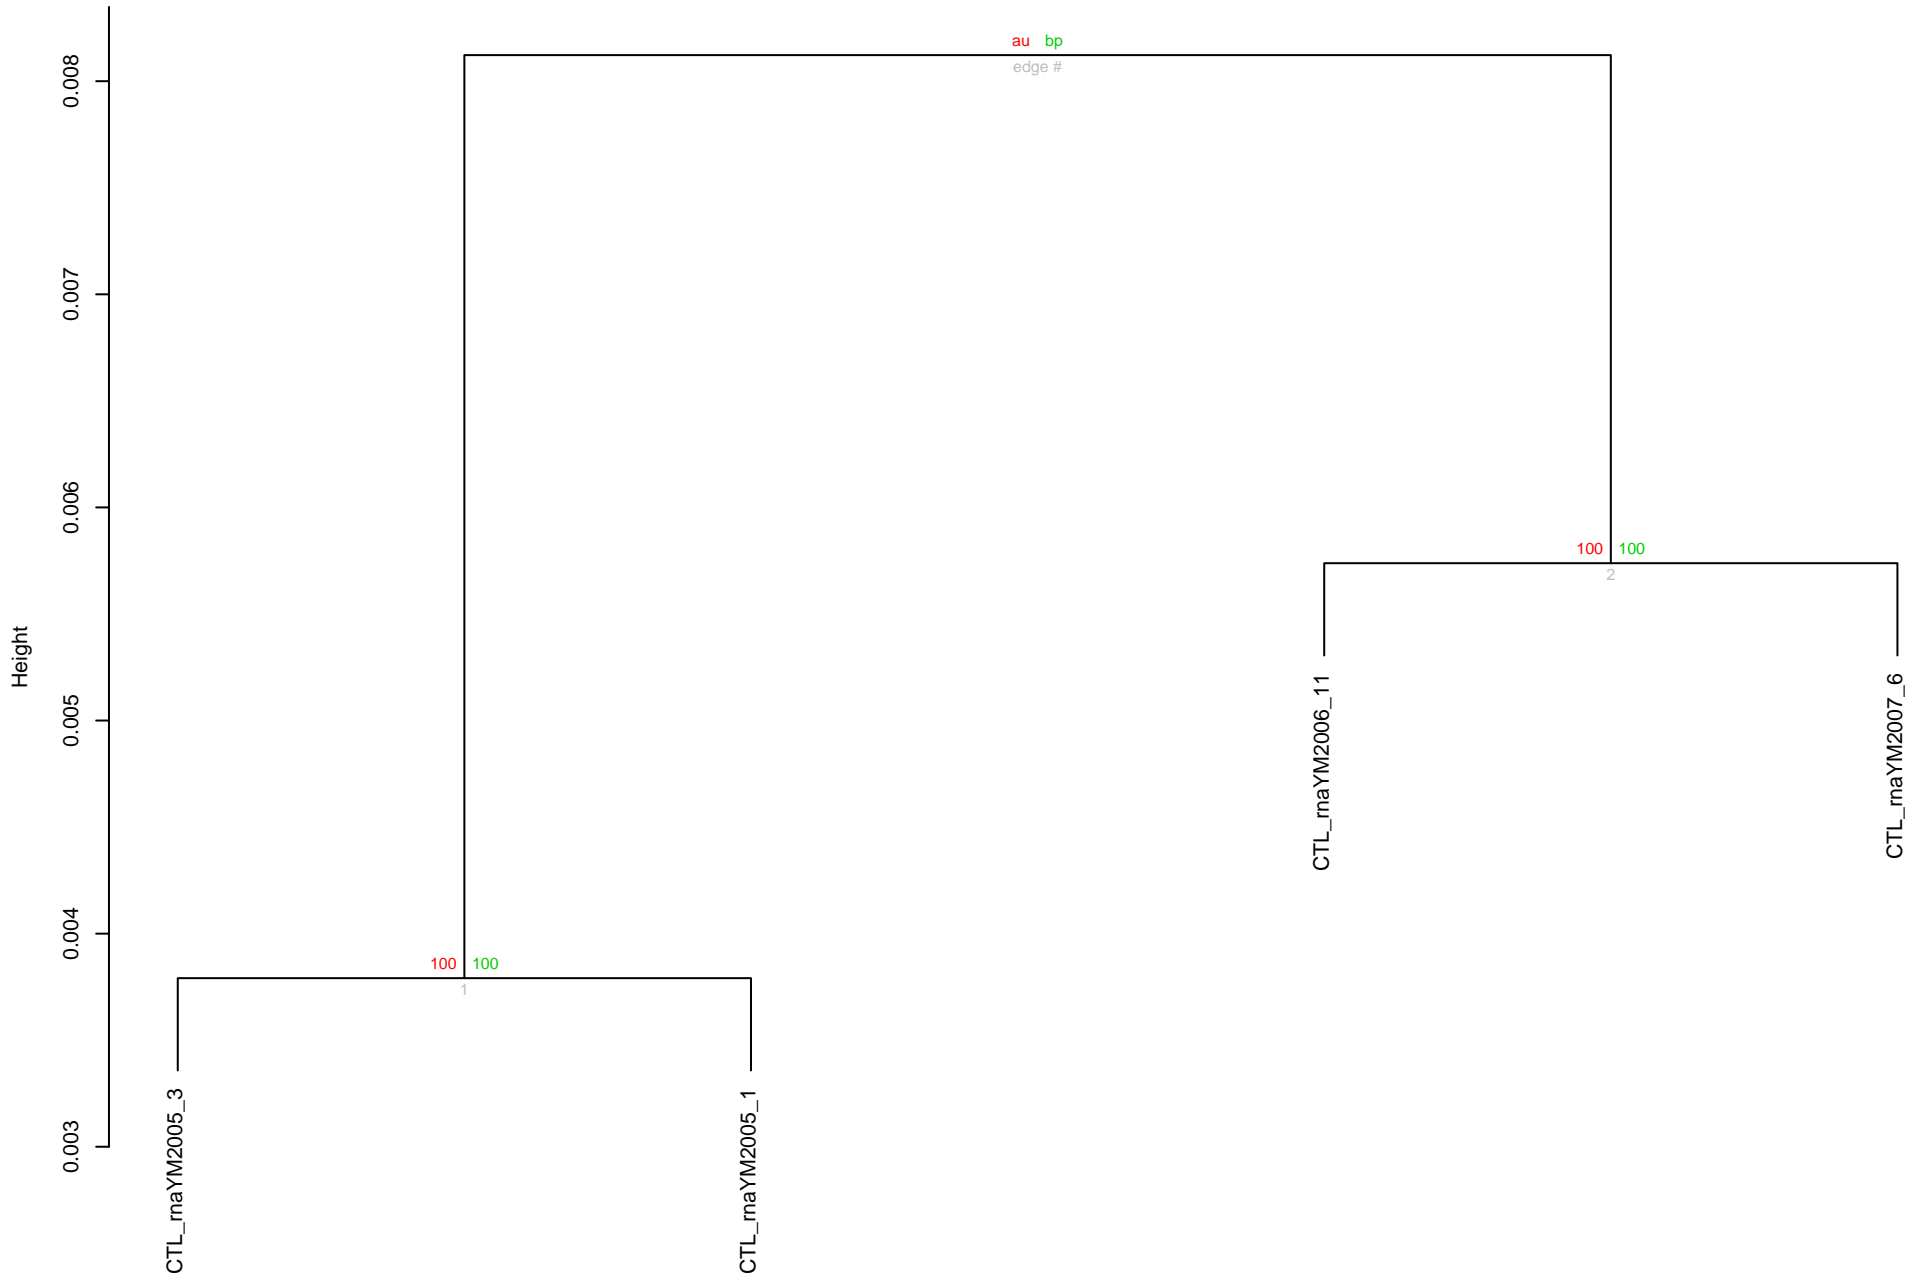

Figure S18A

Distance: correlation  
 Cluster method: average



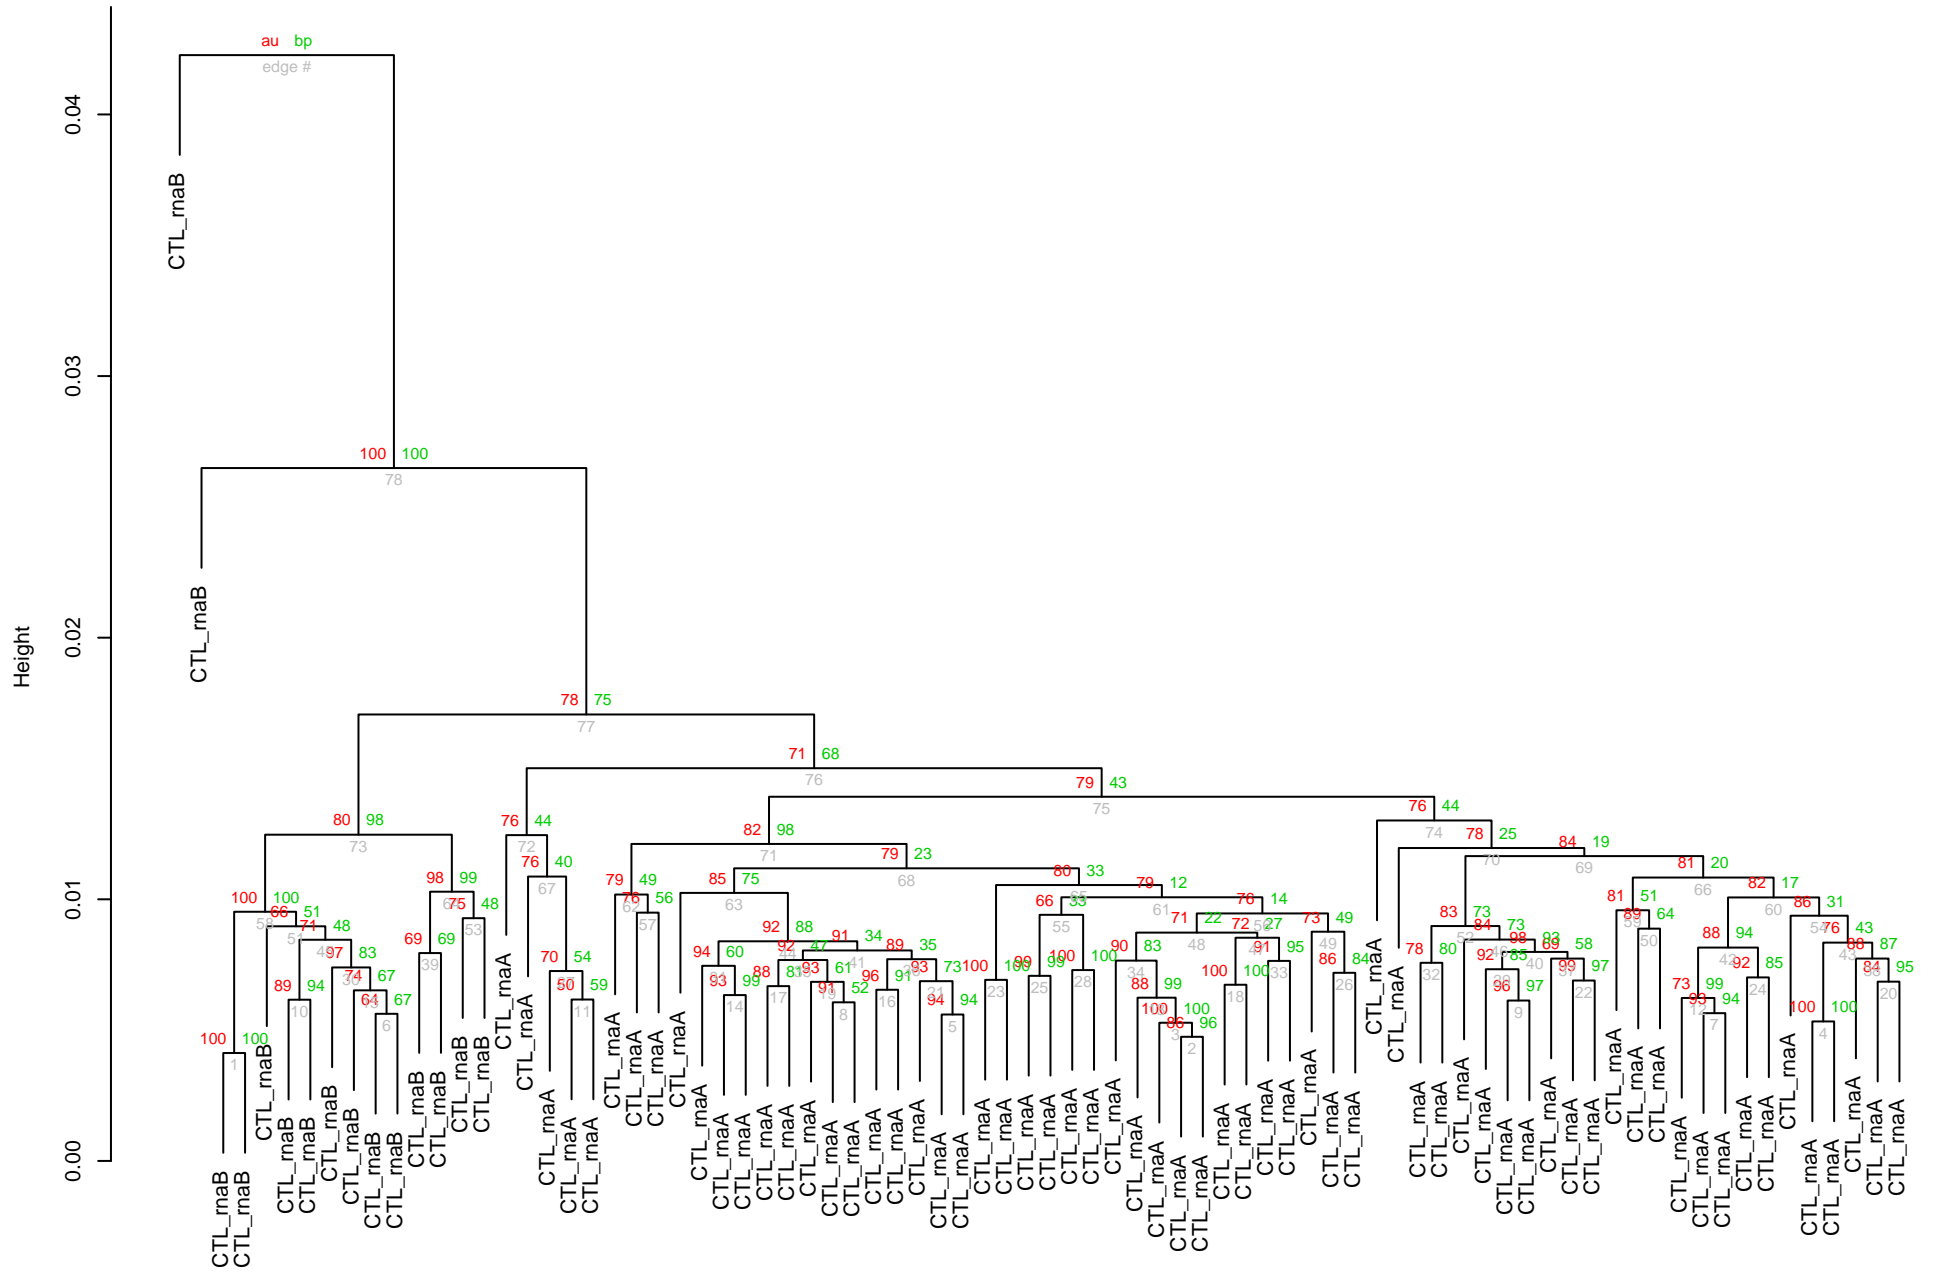

Figure S19B

Distance: correlation  
 Cluster method: average

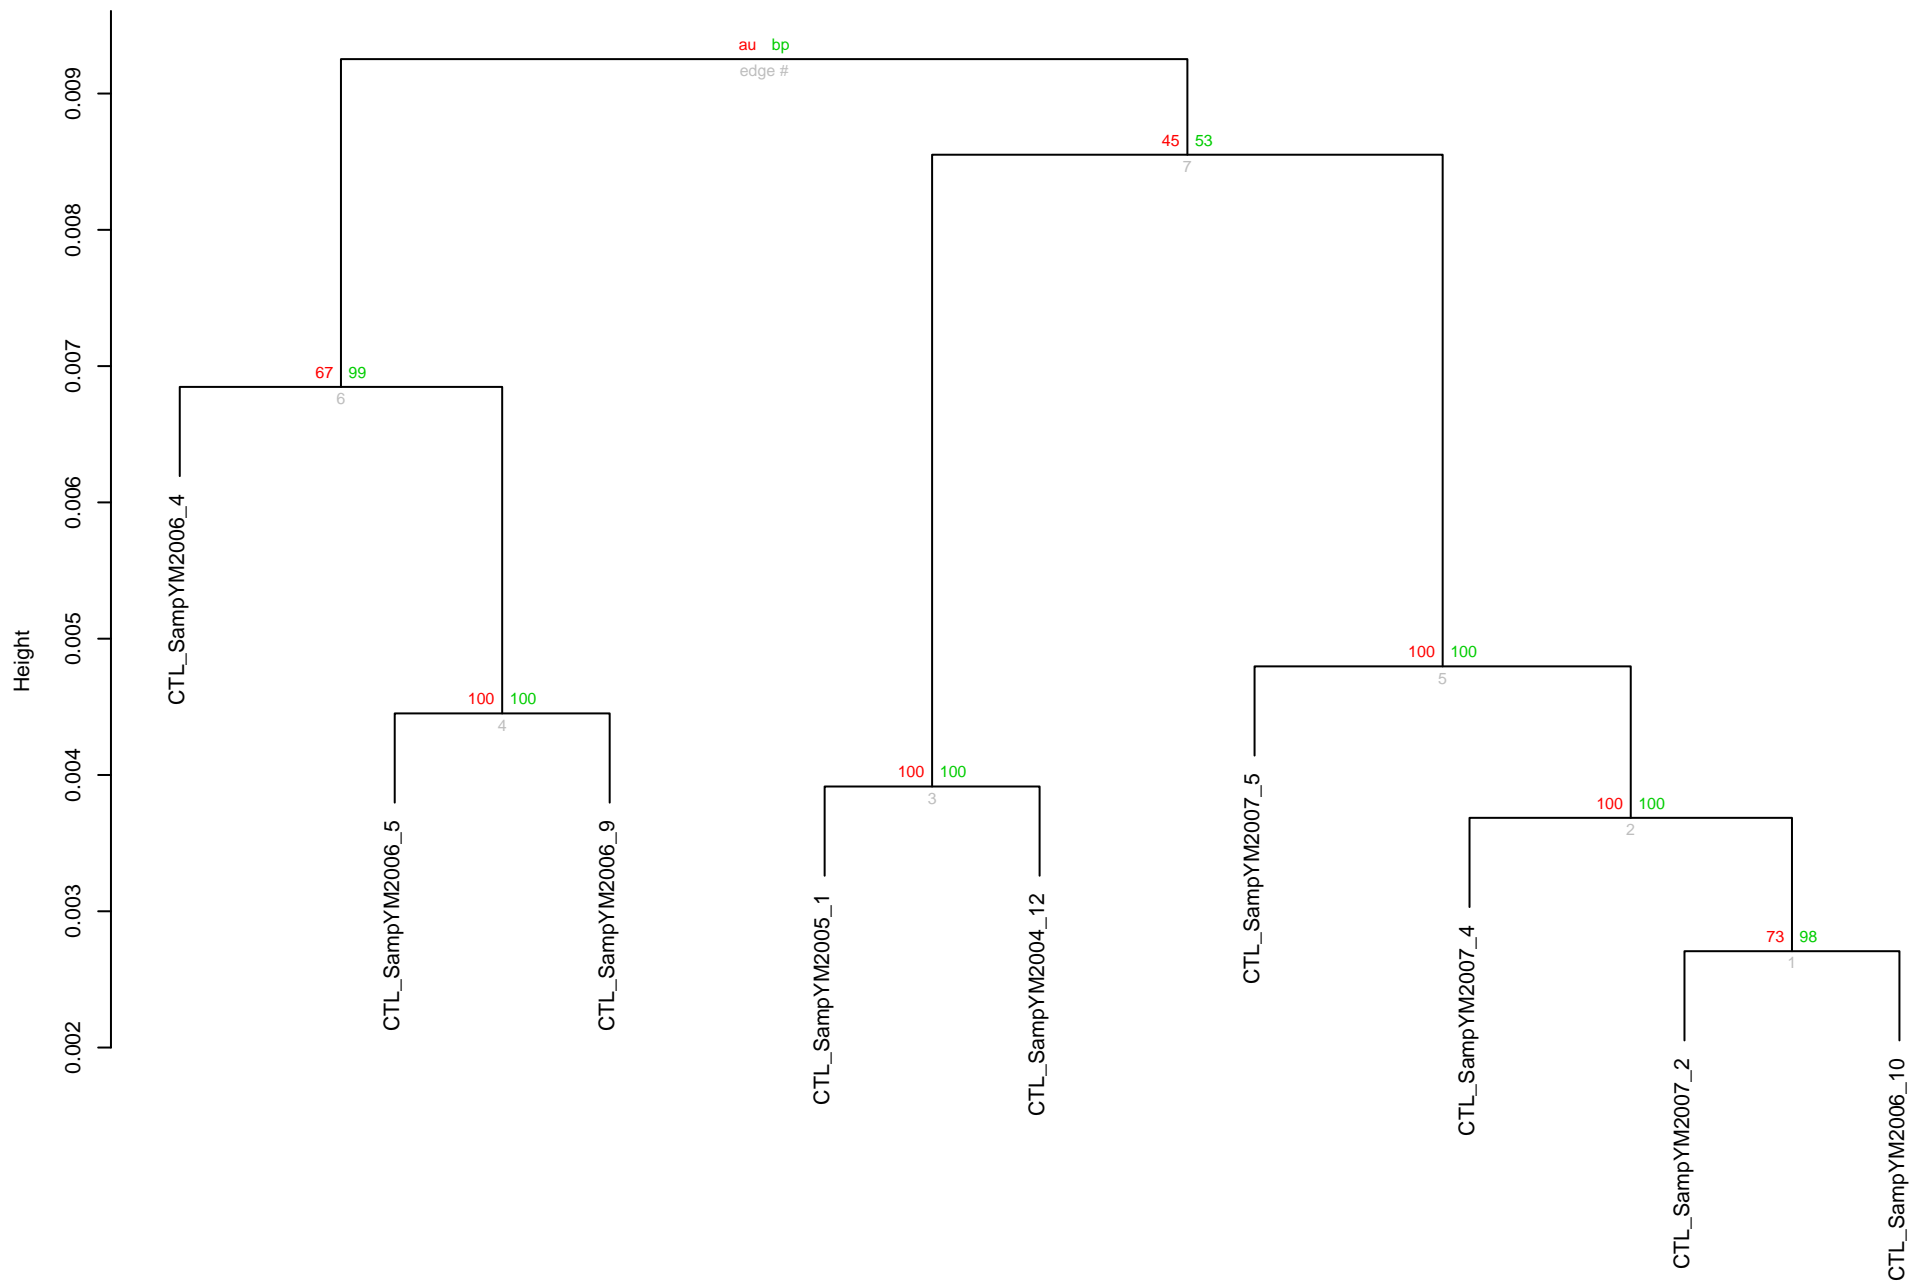

Figure S20A

Distance: correlation  
Cluster method: average



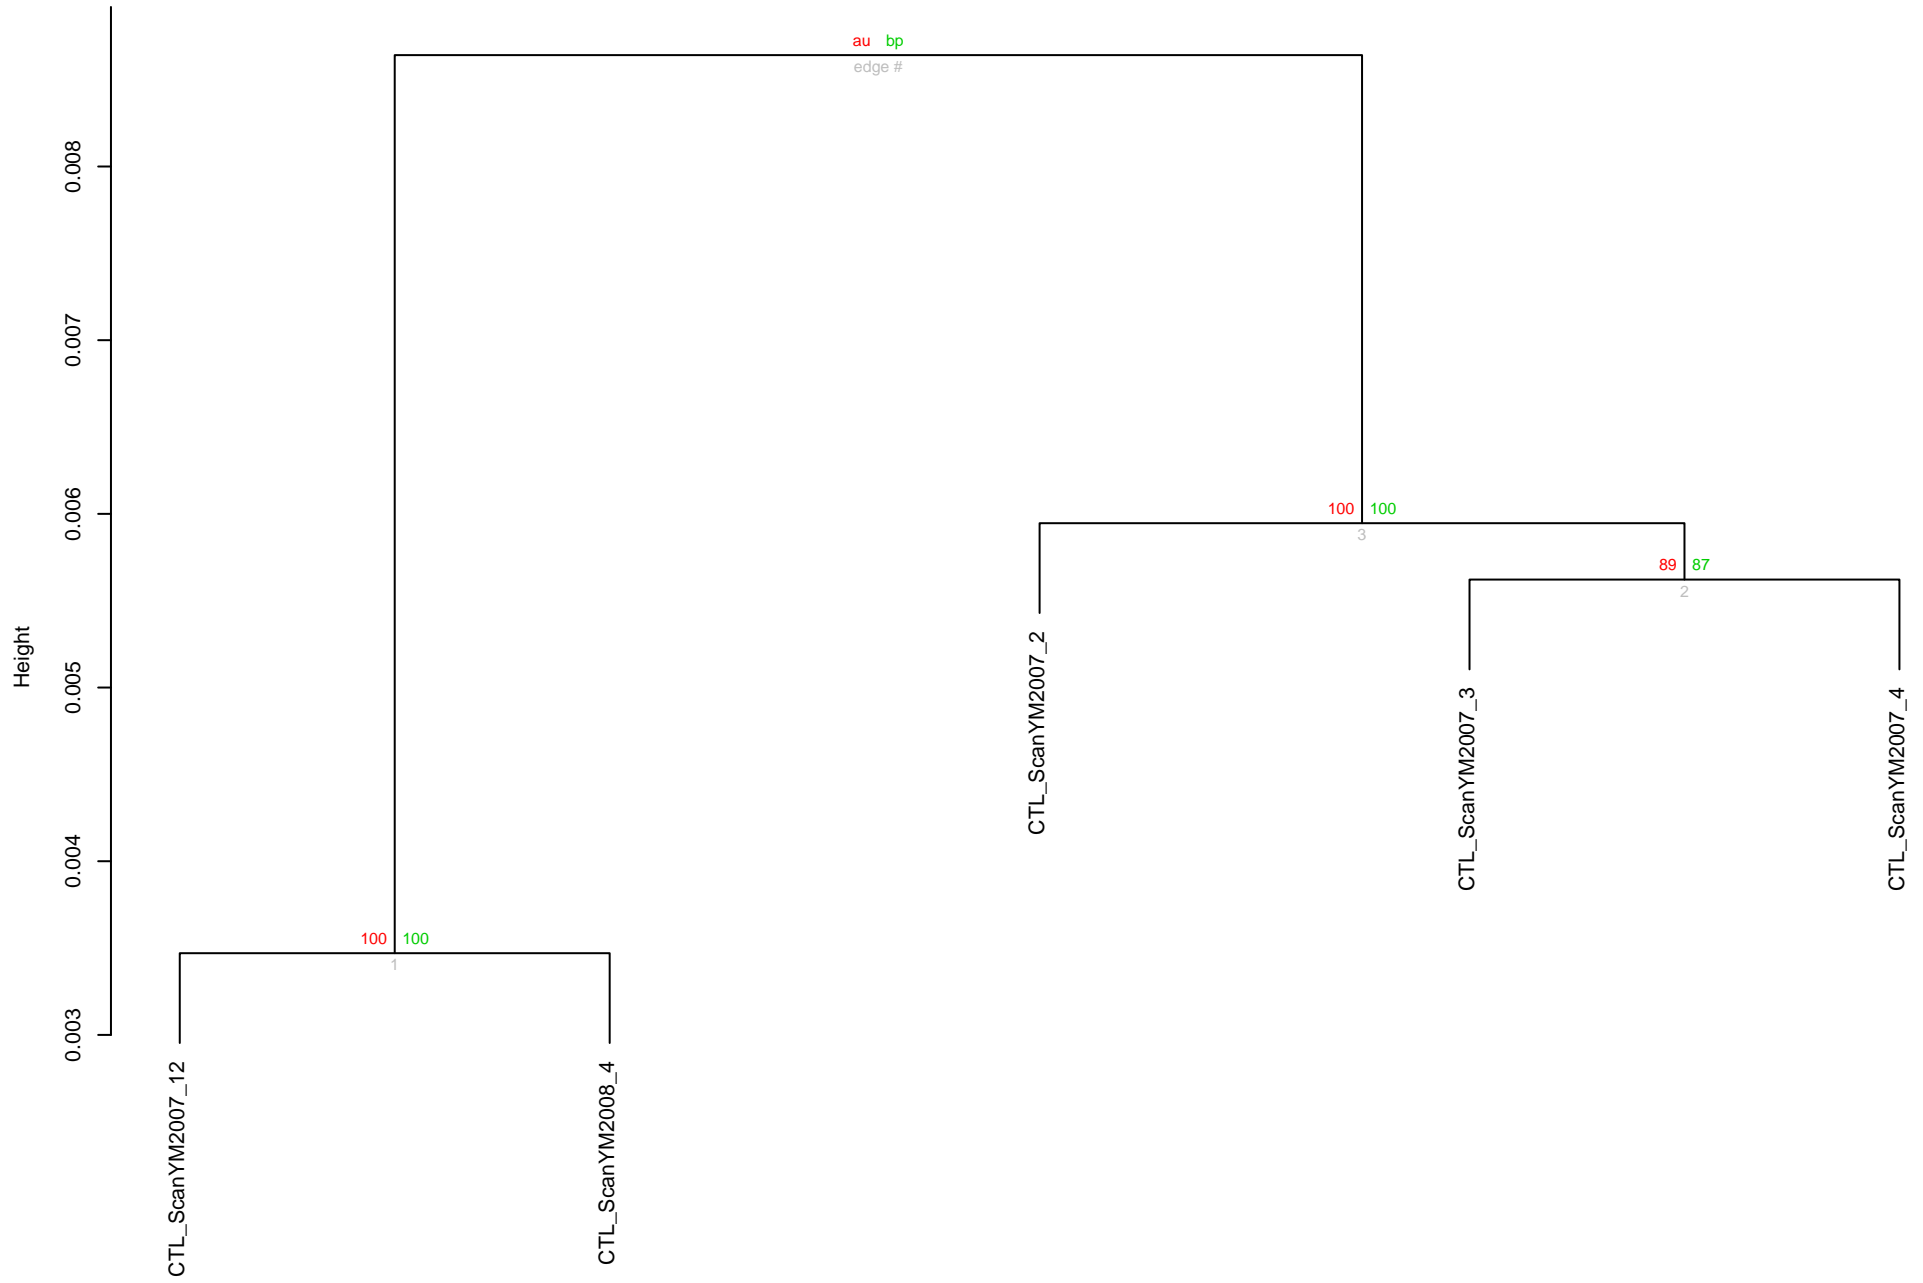

Figure S21A

Distance: correlation  
 Cluster method: average



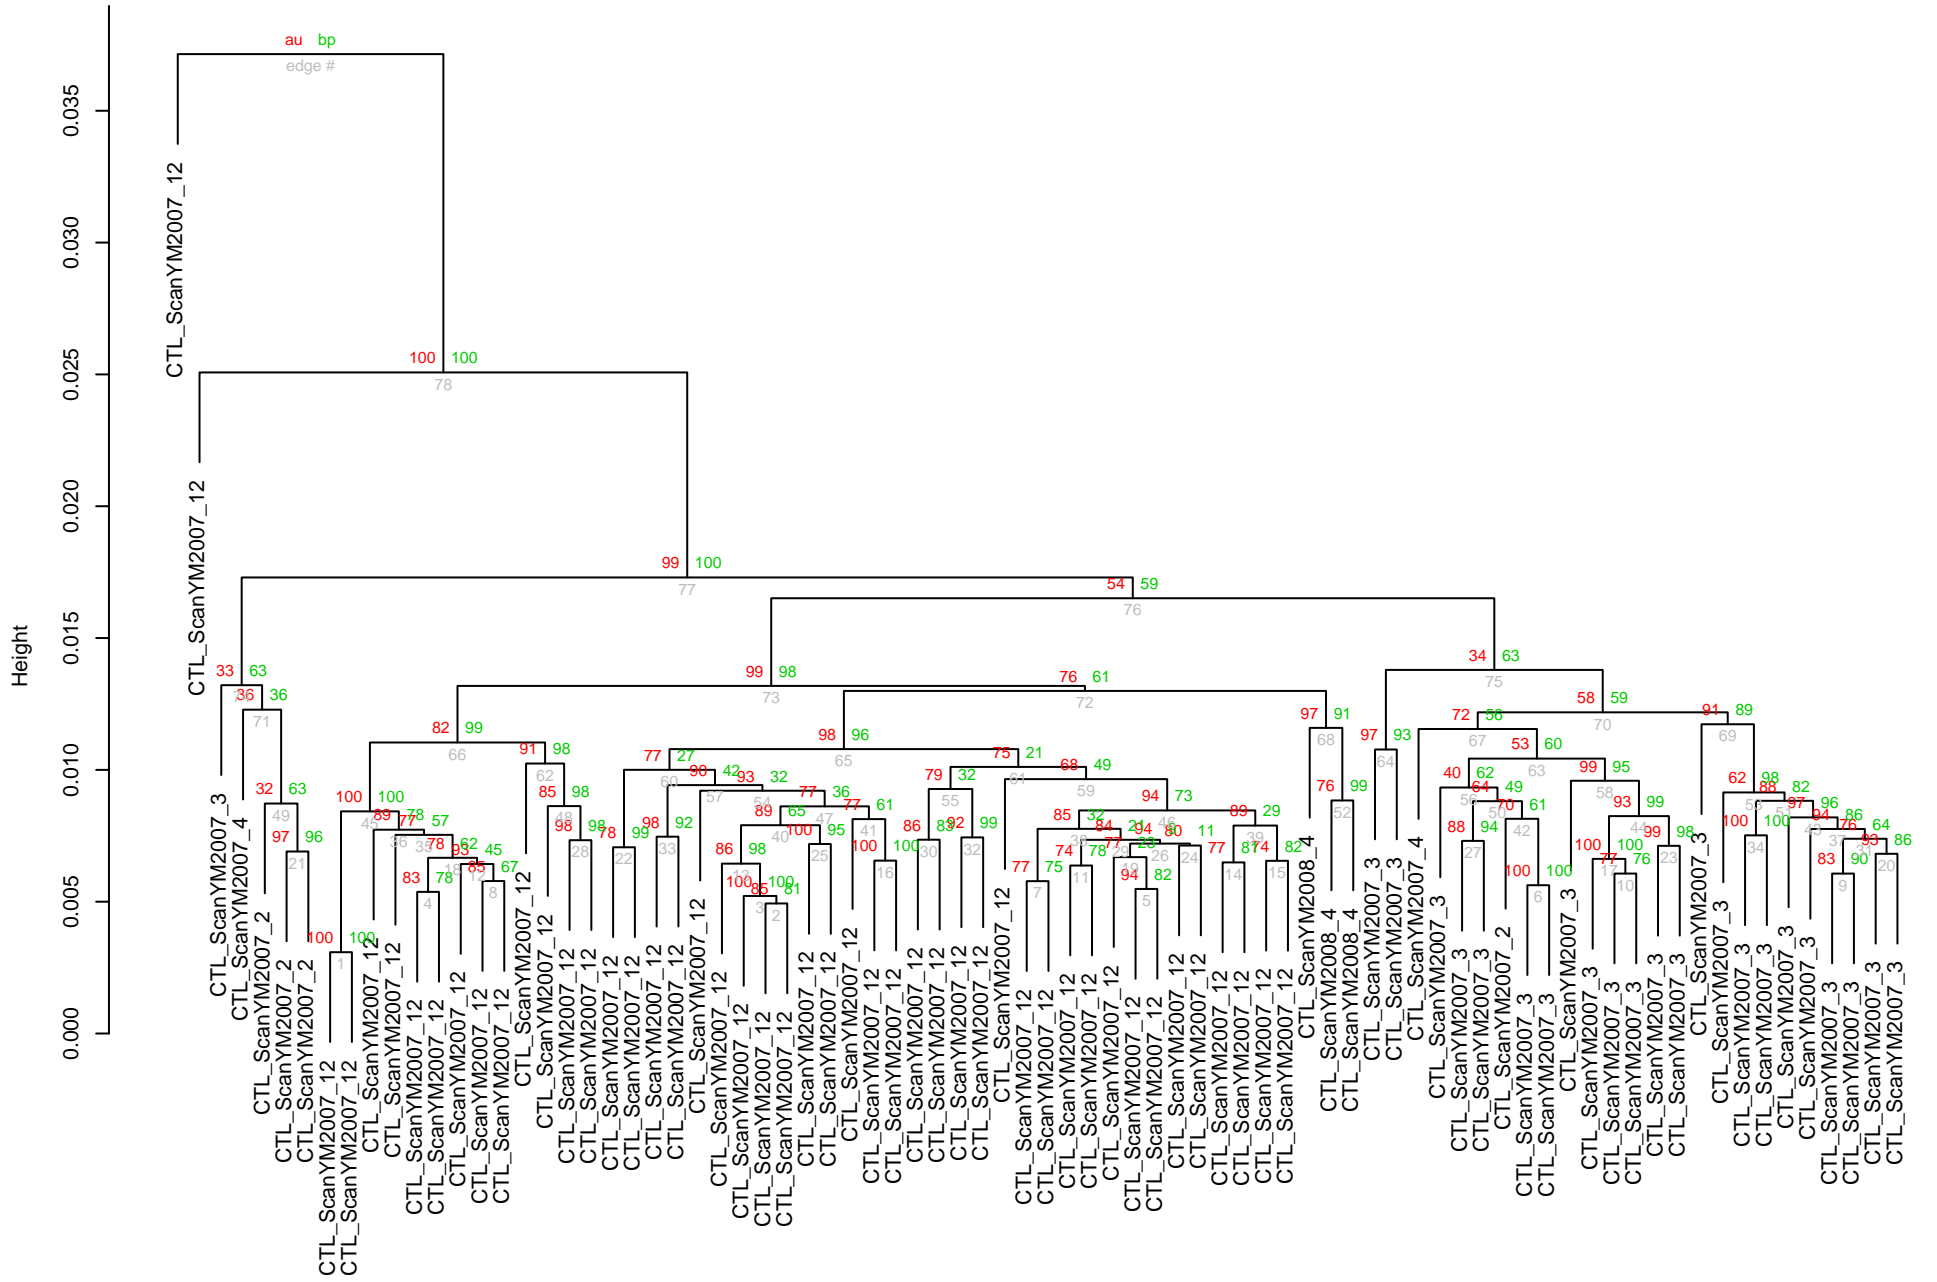

Figure S21B

Distance: correlation  
 Cluster method: average
